# Supplementary material for: One-pot two-component tandem multiple transformations in the synthesis of N,4-diaryl-2,3-dihydropyrrolo[3,4-c]quinolin-1,3-diones and their 3-thioxo-analogues under neat conditions
Source: Royal Society of Chemistry journal article supplement (doi:10.1039/c3ra43489c), 2013-01-01

## One-pot two component tandem multiple transformations in the synthesis of *N*,4-diaryl-2,3-dihydropyrrolo[3,4-*c*]quinolin-1,3-diones and their 3-thioxo-analogues in neat phase

Sreenivas Avula,<sup>†</sup> Satish Koppireddi,<sup>†</sup> Jayaram Reddy Komsani,<sup>†</sup> Jagadeesh Babu Nanubolu<sup>§</sup>,  
and Rambabu Yadla,<sup>†,\*</sup>

<sup>†</sup> *Fluoroorganics Division, CSIR-Indian Institute of Chemical Technology, Tarnaka, Hyderabad-500607, India.* <sup>§</sup> *Center for X-ray Crystallography, CSIR-IICT, Hyderabad-500607, India.*

E-Mail: [ryadla@yahoo.com](mailto:ryadla@yahoo.com)

### Supporting information for Publication

#### Table of Contents:

|                                                                                                |         |
|------------------------------------------------------------------------------------------------|---------|
| General information .....                                                                      | S1-S2   |
| X-ray crystallographic data of compound <b>3a</b> .....                                        | S2-S3   |
| <sup>1</sup> H NMR and <sup>13</sup> C NMR spectra of compounds <b>3a-z<sub>vi</sub></b> ..... | S4-S35  |
| HRMS – Data (spectra) of compounds <b>3a-z<sub>vi</sub></b> .....                              | S36-S66 |

**General Information:** β-Aroyl-thioacetanilides (**5**, X = S) are prepared as reported in literature. Isatine derivatives (**1**), DMAP (4-dimethylaminopyridine) and solvents used are commercially available. IR spectra of all the compounds are recorded in KBr on FT-IR spectrometer and  $\nu$  values are reported in reciprocal centimetres (cm<sup>-1</sup>). <sup>1</sup>H NMR spectra are recorded at 300 MHz with TMS as internal standard ( $\delta = 0$ ) and the values are reported as follows: chemical shift ( $\delta$  ppm), multiplicity (s = singlet, d = doublet, t = triplet, q = quartet, m = multiplet), coupling constants (in Hz) and integration. For <sup>13</sup>C NMR at 75 MHz, CDCl<sub>3</sub> ( $\delta = 77.27$ ) and/or TFA ( $\delta = 115$  q, 161 q) are used as internal standards and spectra are obtained with complete proton decoupling. Low-resolution MS and HRMS data are obtained using Electron Spray Ionization (ESI) and high-resolution spectra are recorded on QSTARXL hybrid MS/MS system under ESI.

All the reactions are monitored by thin layer chromatography (TLC) on precoated silica gel 60 F<sub>254</sub> (mesh) and spots are visualized under UV light.

### X-ray Crystallography Data of compound 3a:

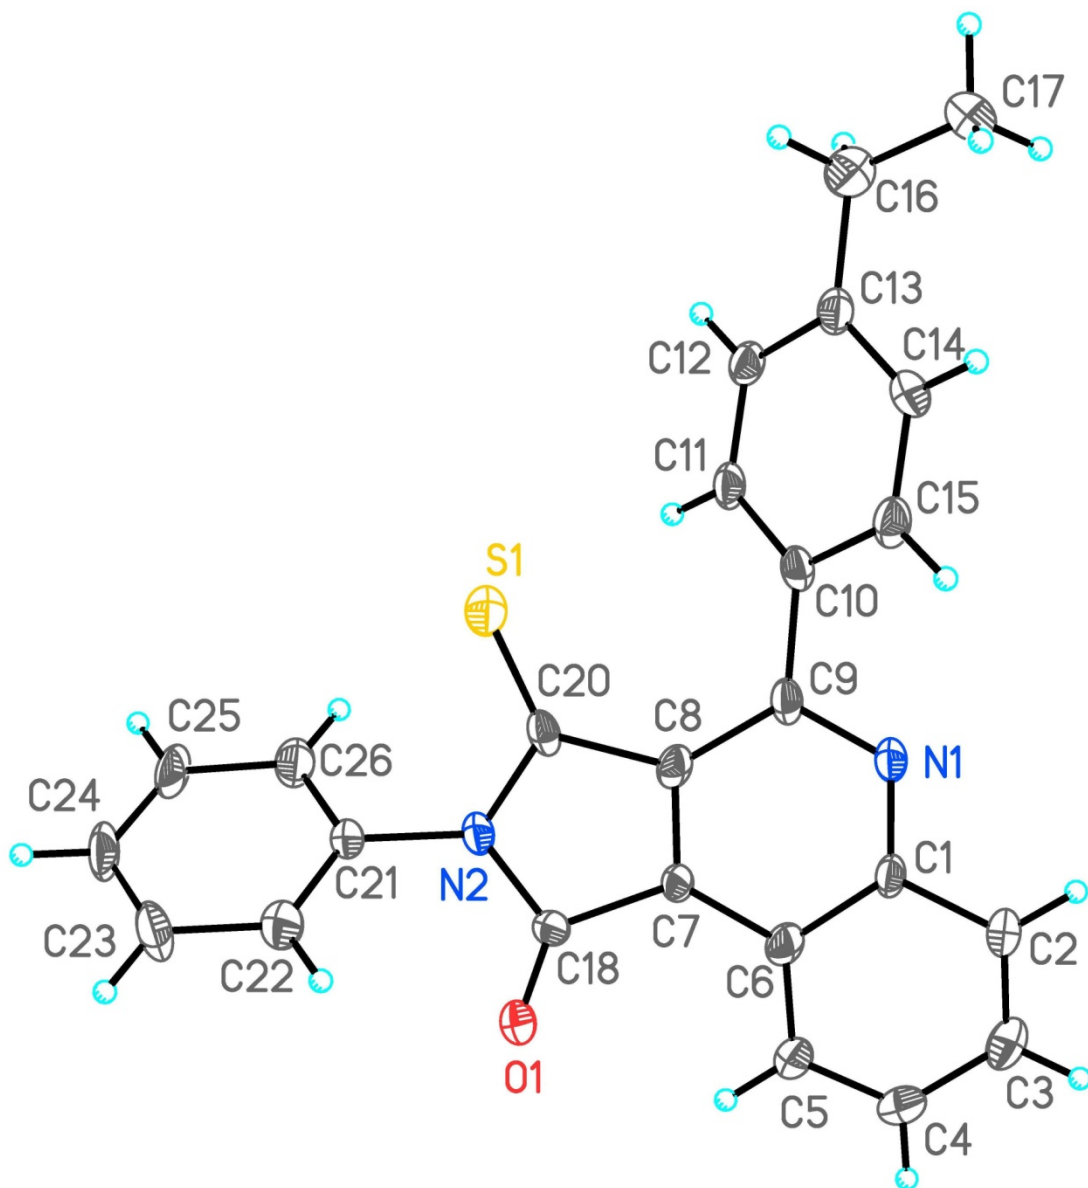

**Figure caption:** The molecular structure of **3a**, with the atom-numbering scheme. Displacement ellipsoids are drawn at the 30% probability level and H atoms are shown as small spheres of arbitrary radius.

### Crystallographic data for 3a

X-ray data for the compound were collected at room temperature with a graphite monochromated MoK $\alpha$  radiation ( $\lambda=0.71073\text{\AA}$ ) with  $\omega$ -scan method.<sup>1</sup> Preliminary lattice parameters and orientation matrices were obtained from four sets of frames. Unit cell dimensions were determined using 3740 reflections for **3a** data. Integration and scaling of intensity data were accomplished using SAINT program.<sup>1</sup> The structures were solved by Direct Methods using SHELXS97<sup>2</sup> and refinement was carried out by full-matrix least-squares technique using SHELXL97.<sup>2</sup> Anisotropic displacement parameters were included for all non-hydrogen atoms. All H atoms were positioned geometrically and treated as riding on their parent C atoms, with C-H distances of 0.93--0.97  $\text{\AA}$ , and with  $U_{\text{iso}}(\text{H}) = 1.2U_{\text{eq}}(\text{C})$  or  $1.5U_{\text{eq}}(\text{C})$  for methyl atoms.

Crystal data for AO68: C<sub>25</sub>H<sub>18</sub>N<sub>2</sub>OS,  $M = 394.47$ , colourless needle,  $0.42 \times 0.23 \times 0.11$  mm<sup>3</sup>, orthorhombic, space group  $P2_12_12_1$  (No. 19),  $a = 4.2876(5)$ ,  $b = 19.102(2)$ ,  $c = 23.711(3)$   $\text{\AA}$ ,  $V = 1942.0(4)$   $\text{\AA}^3$ ,  $Z = 4$ ,  $D_c = 1.349$  g/cm<sup>3</sup>,  $F_{000} = 824$ , CCD area detector, Mo-K $\alpha$  radiation,  $\lambda = 0.71073$   $\text{\AA}$ ,  $T = 293(2)\text{K}$ ,  $2\theta_{\text{max}} = 50.0^\circ$ , 18599 reflections collected, 3411 unique ( $R_{\text{int}} = 0.0629$ ). Final  $Goof = 1.315$ ,  $RI = 0.0867$ ,  $wR2 = 0.1938$ ,  $R$  indices based on 3223 reflections with  $I > 2\sigma(I)$  (refinement on  $F^2$ ), 263 parameters,  $\mu = 0.186$  mm<sup>-1</sup>. Absolute structure parameter (Flack parameter)<sup>3</sup> = 0.16(19). CCDC 922749 contains the supplementary crystallographic data for this paper. These data can be obtained free of charge at [www.ccdc.cam.ac.uk/conts/retrieving.html](http://www.ccdc.cam.ac.uk/conts/retrieving.html) [or from the Cambridge Crystallographic Data Centre (CCDC), 12 Union Road, Cambridge CB2 1EZ, UK; fax: +44(0) 1223 336 033; email: [deposit@ccdc.cam.ac.uk](mailto:deposit@ccdc.cam.ac.uk)].

1. SMART & SAINT. Software Reference manuals. Versions 6.28a & 5.625, Bruker Analytical X-ray Systems Inc., Madison, Wisconsin, U.S.A., 2001.
2. Sheldrick, G. M. SHELXS97 and SHELXL97, Programs for crystal structure solution and refinement; University of Gottingen: Germany, 1997.
3. Flack, H. D. *Acta Cryst.* **1983**, *A39*, 876-881.

**$^1\text{H}$  NMR and  $^{13}\text{C}$  NMR spectra for spectroscopic Data of pyrrolo[3,4-*c*]quinolinone derivatives **3a-z<sub>vi</sub>****

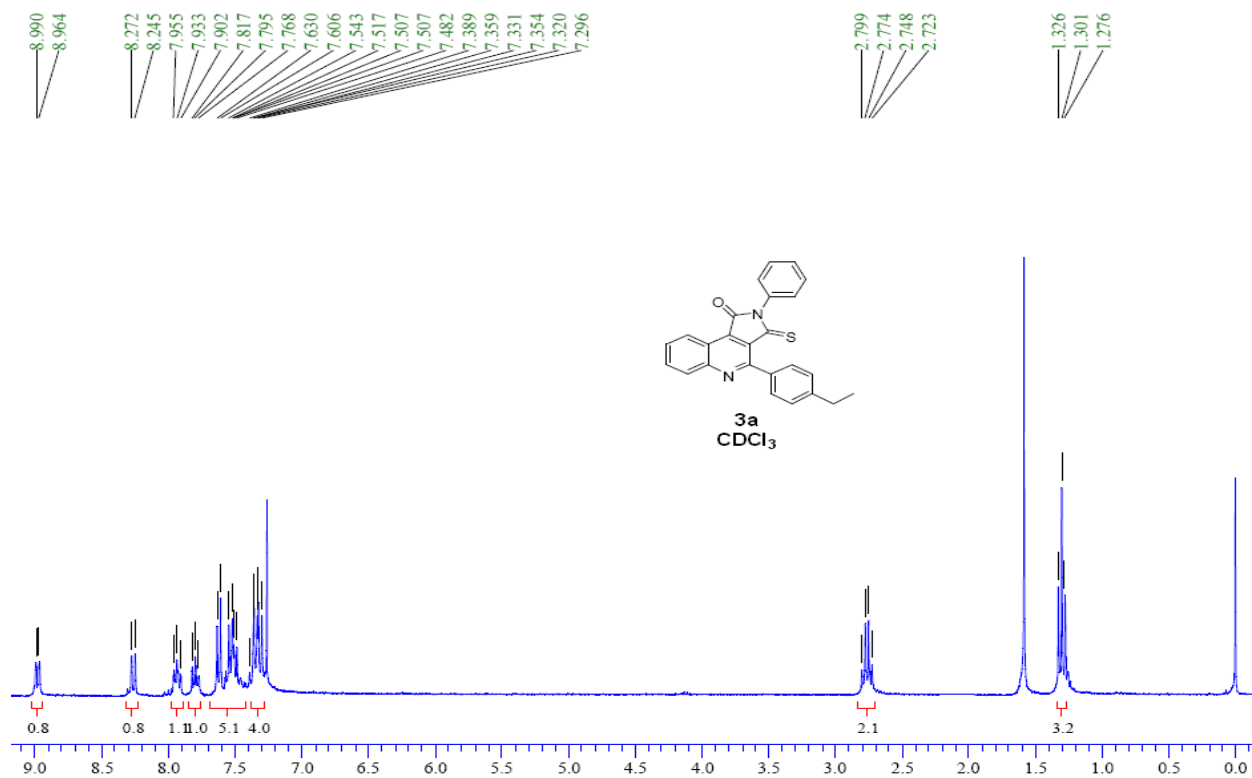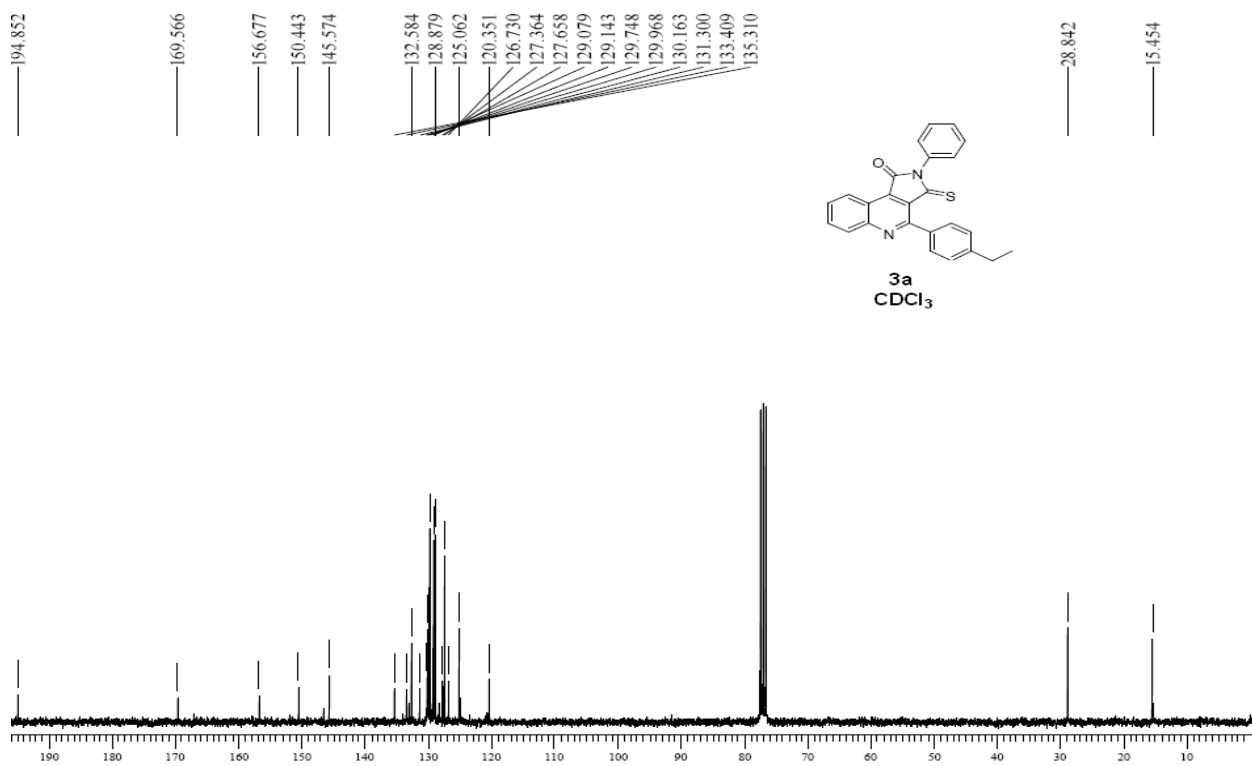

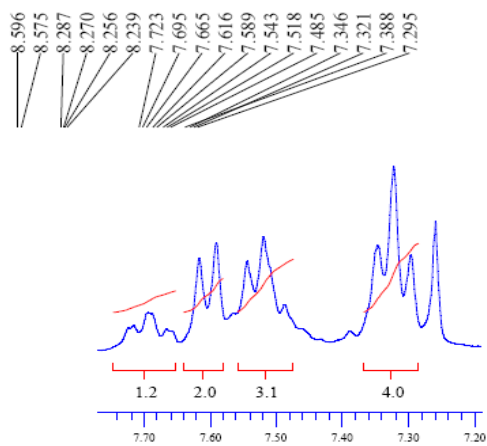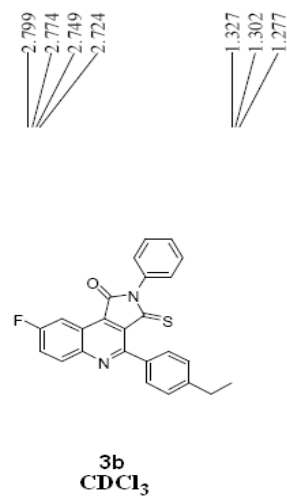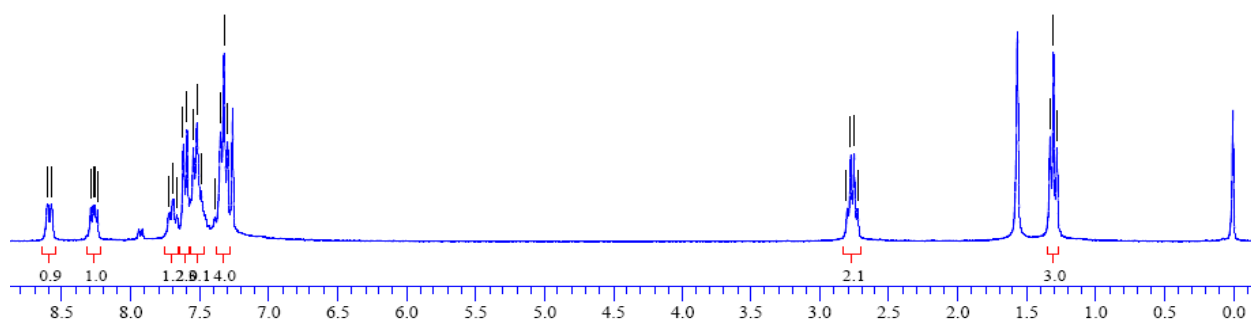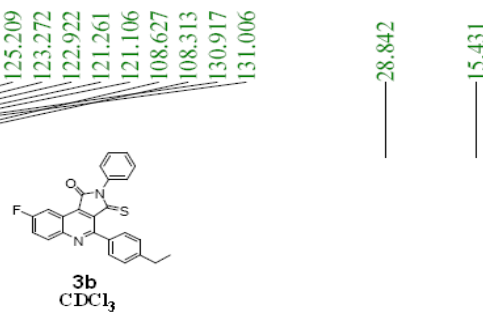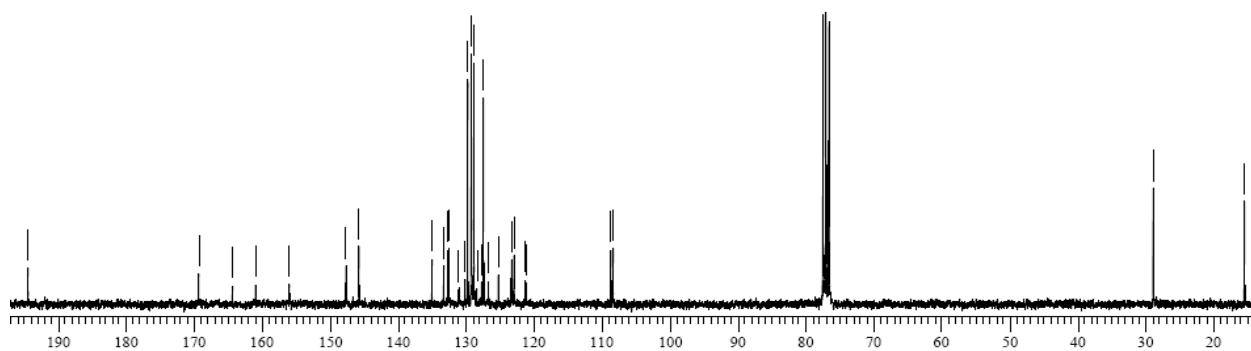

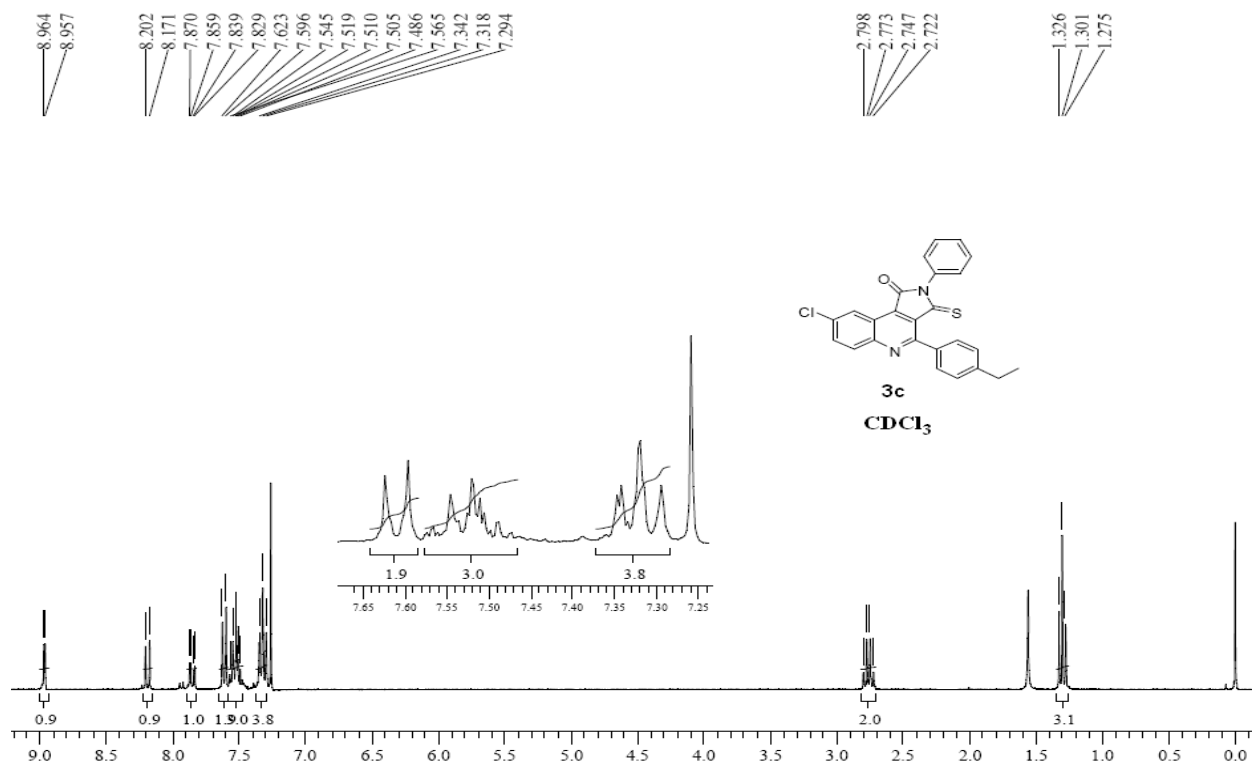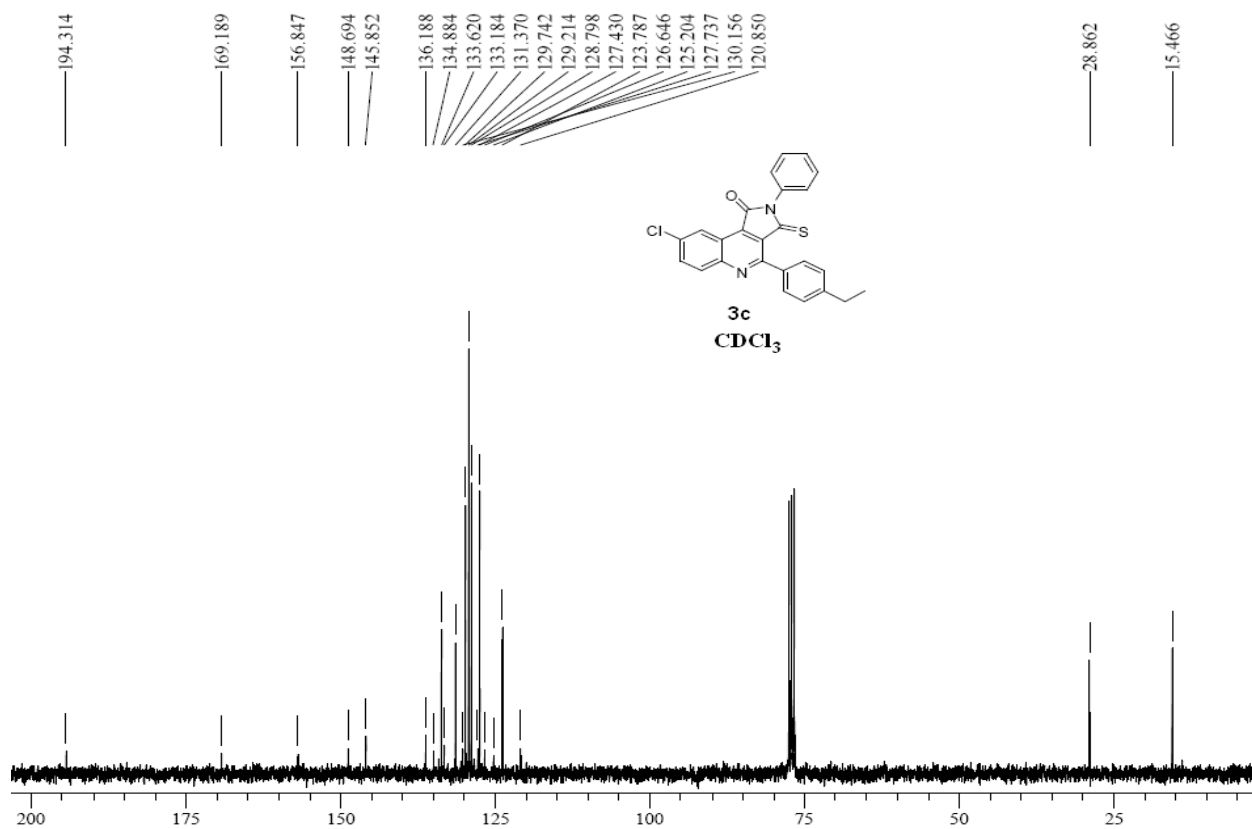

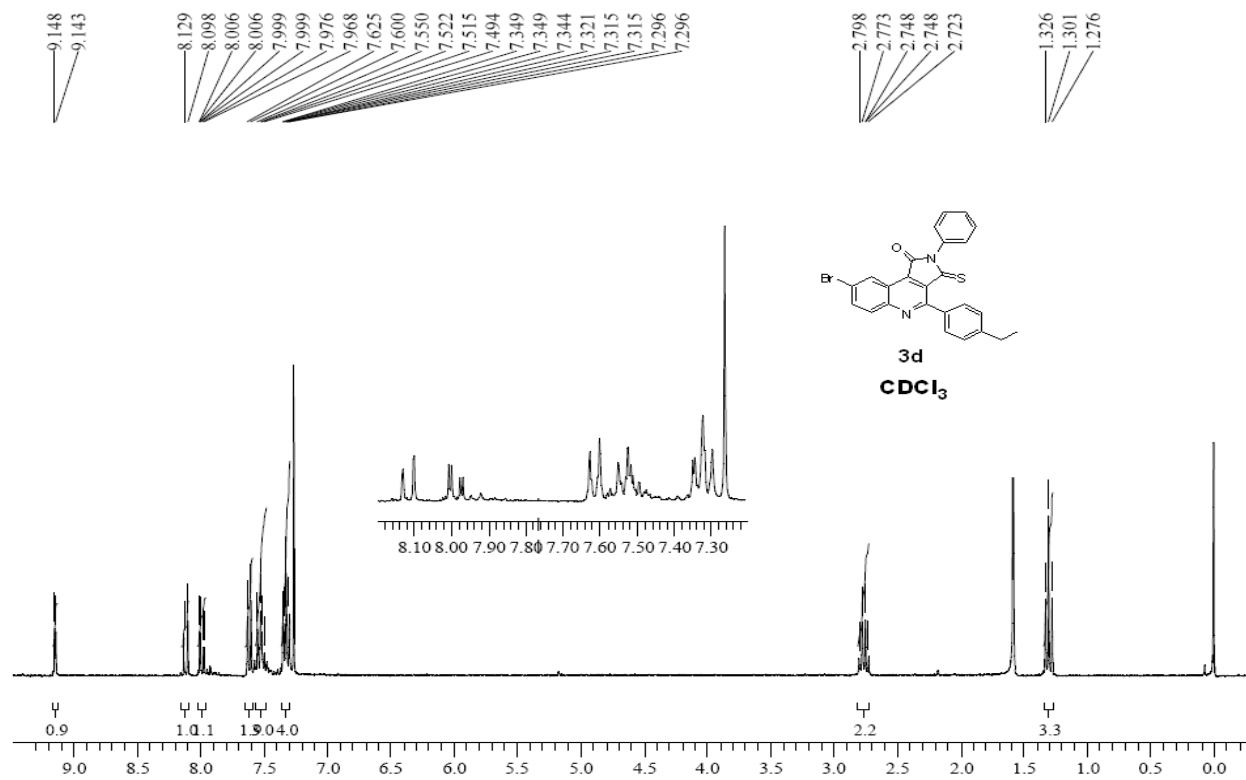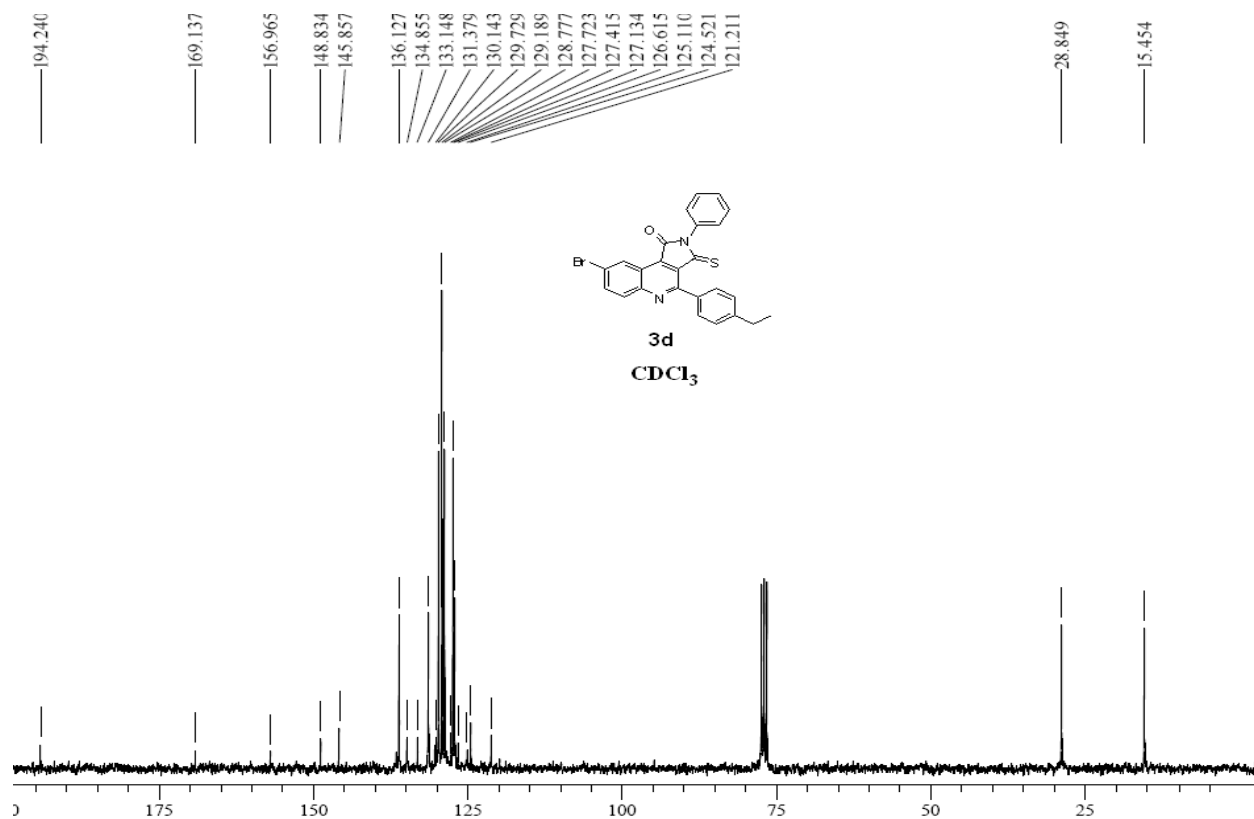



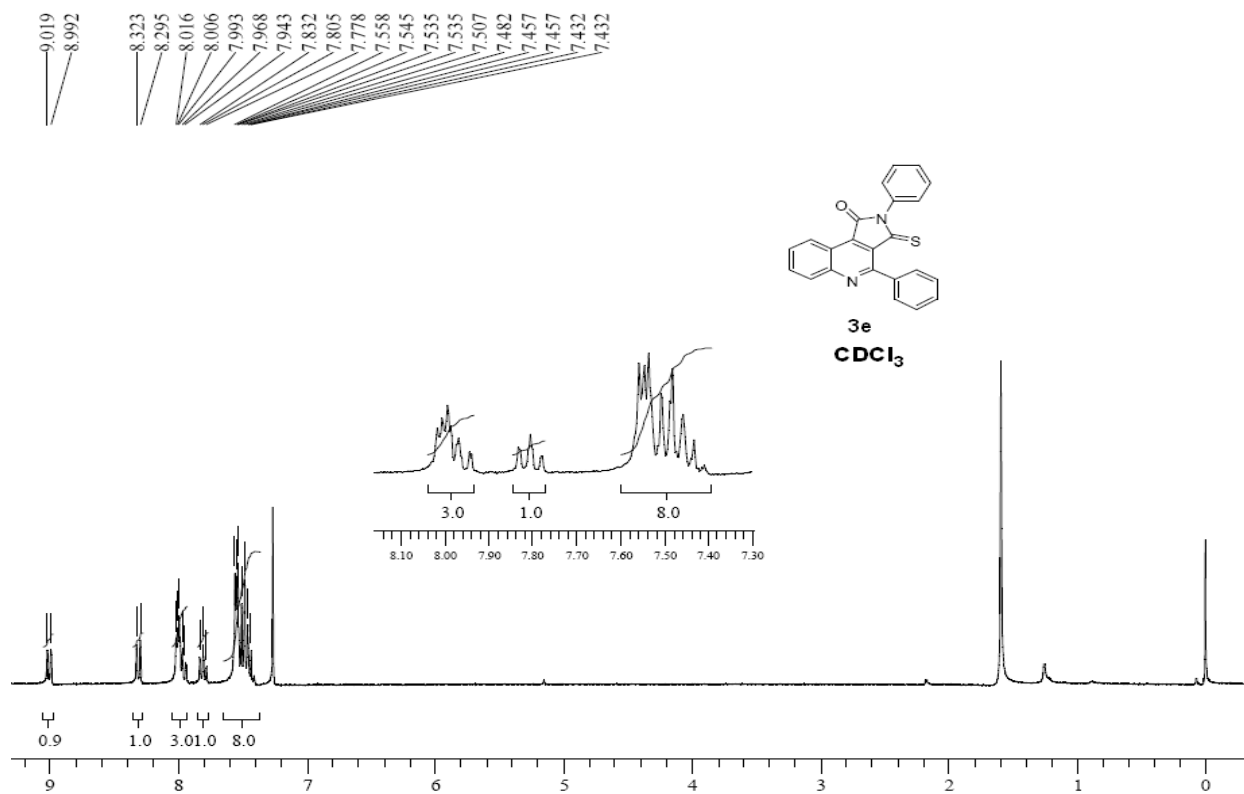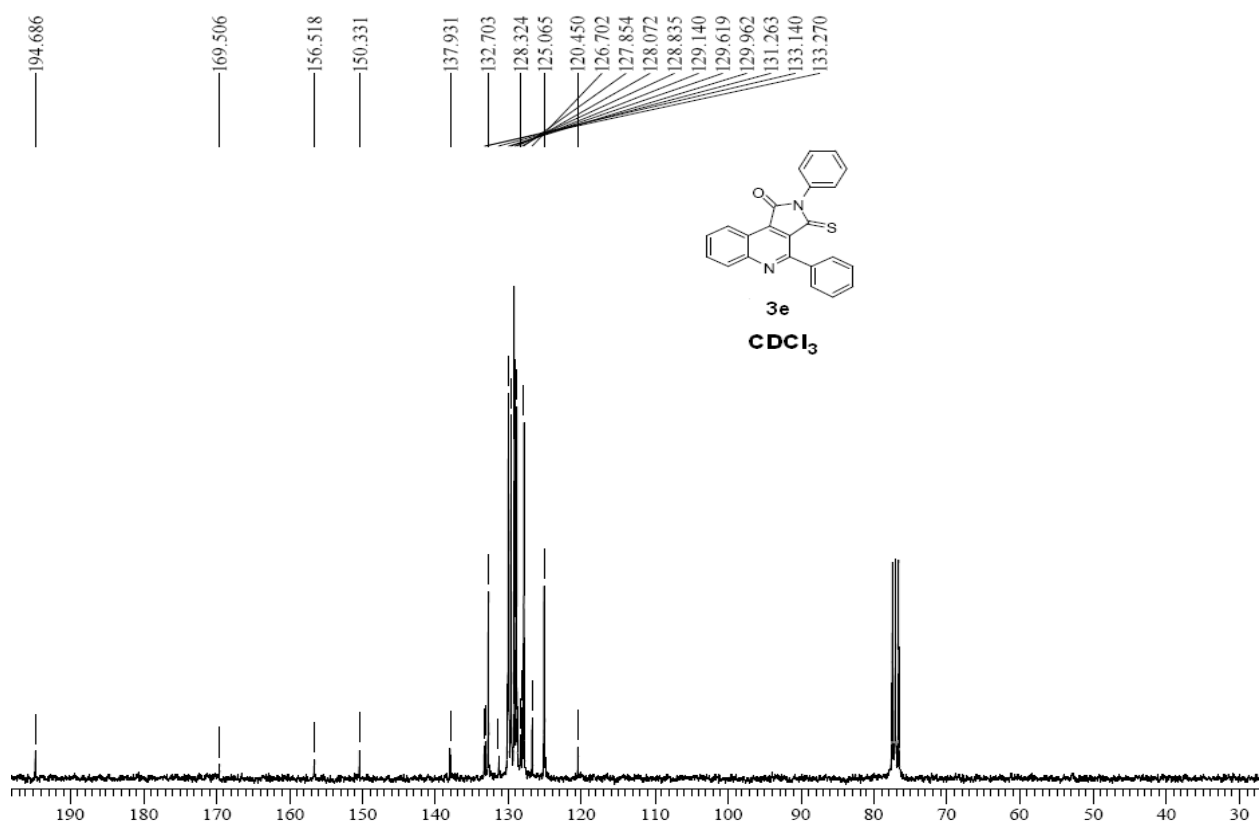

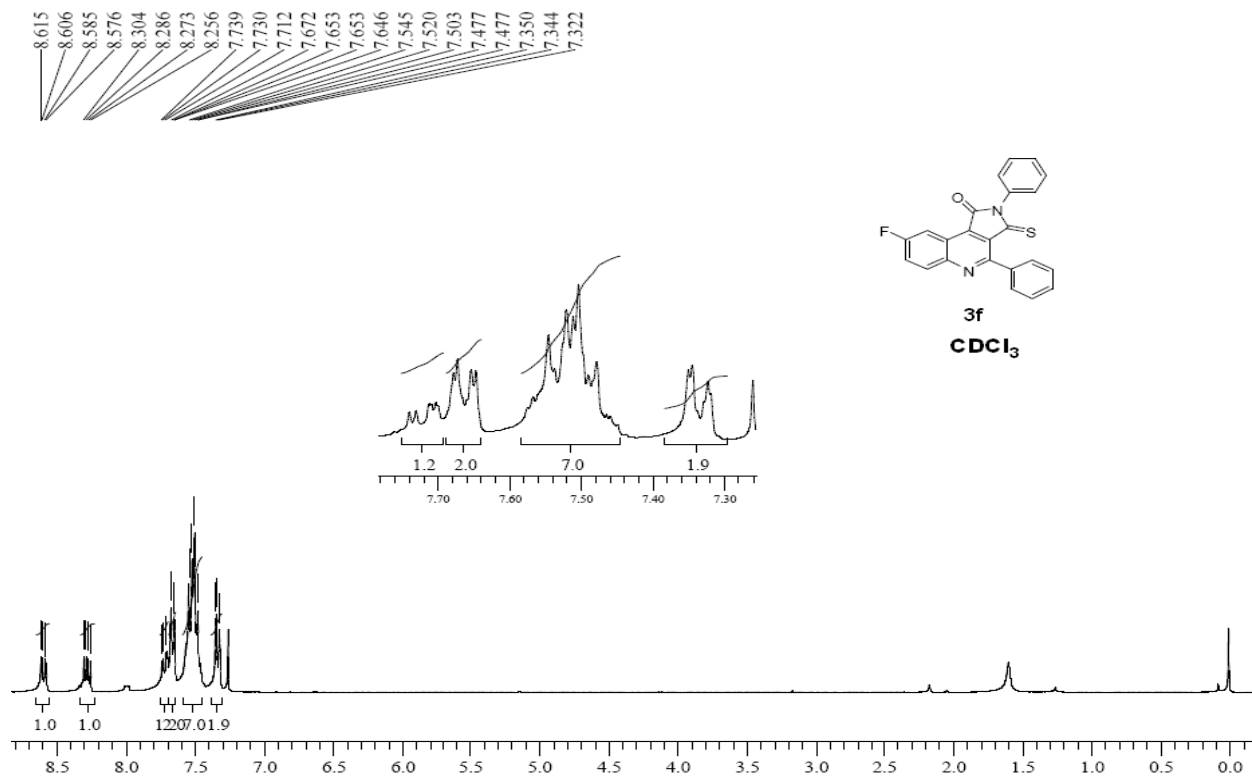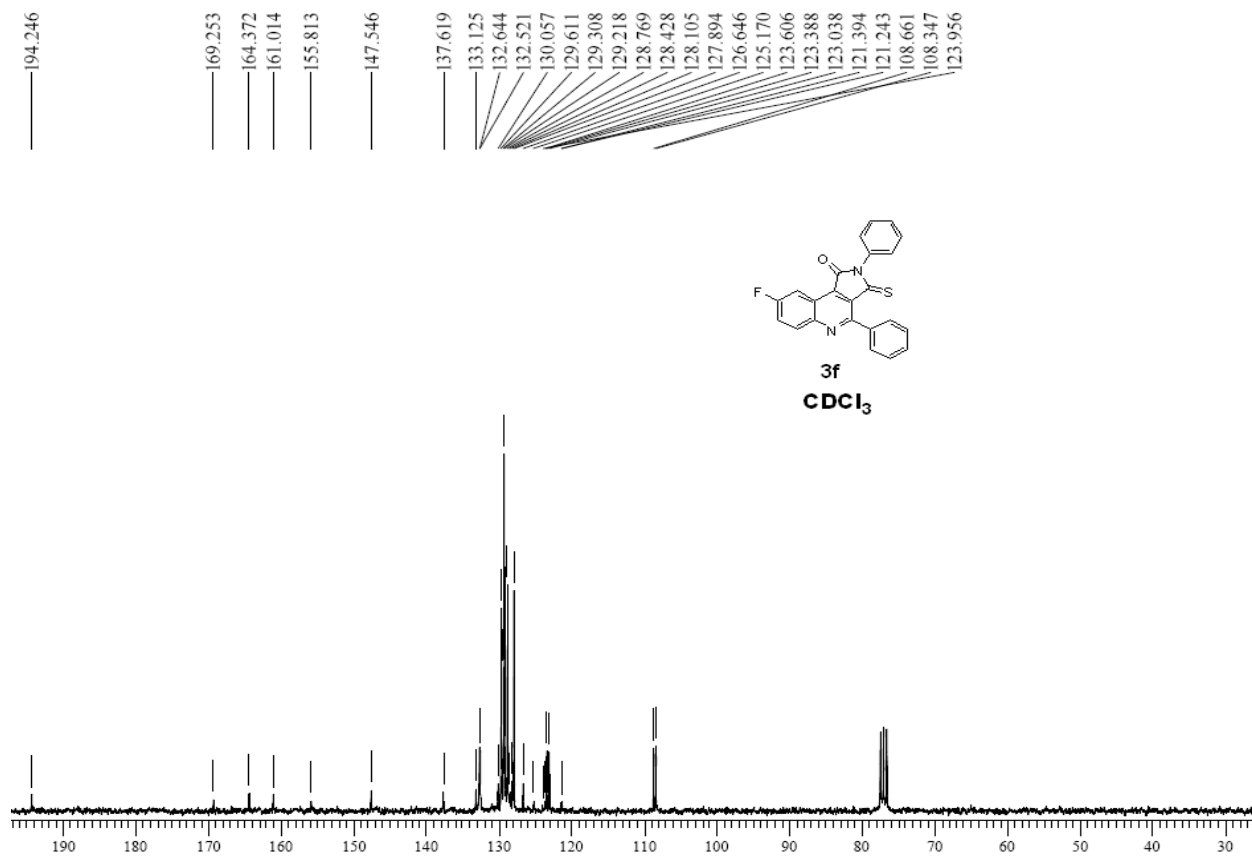

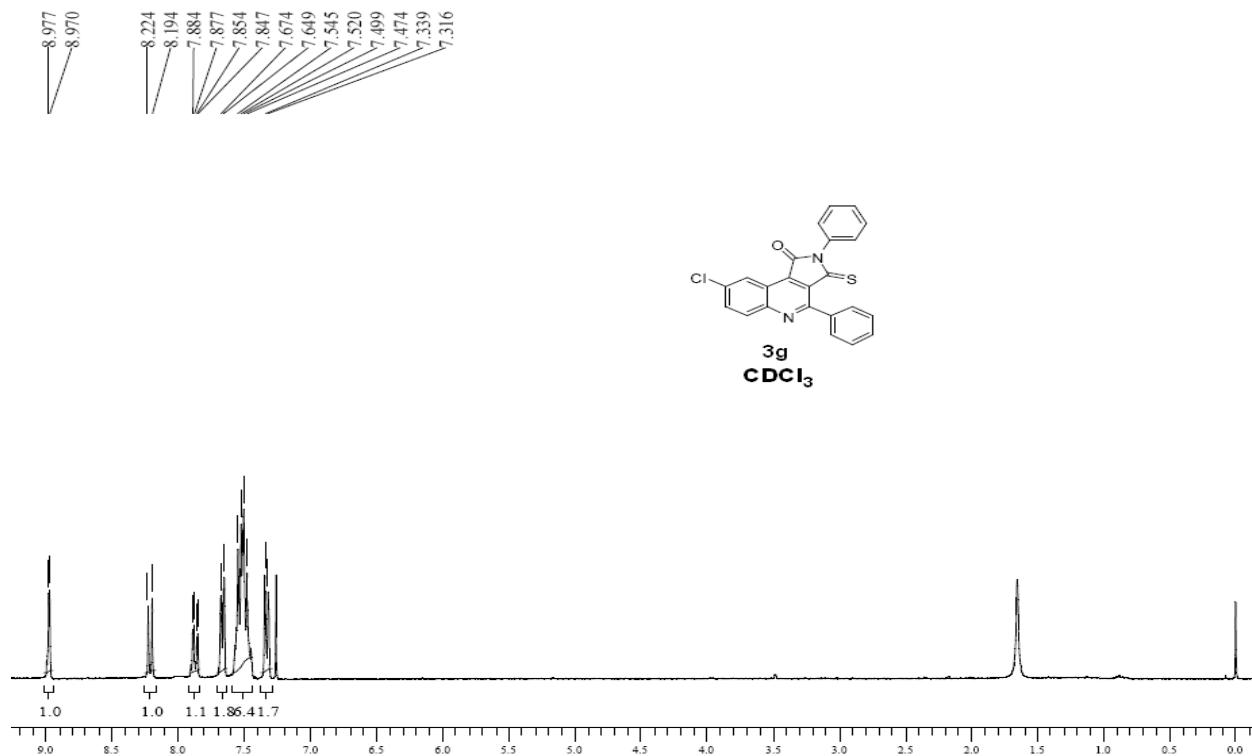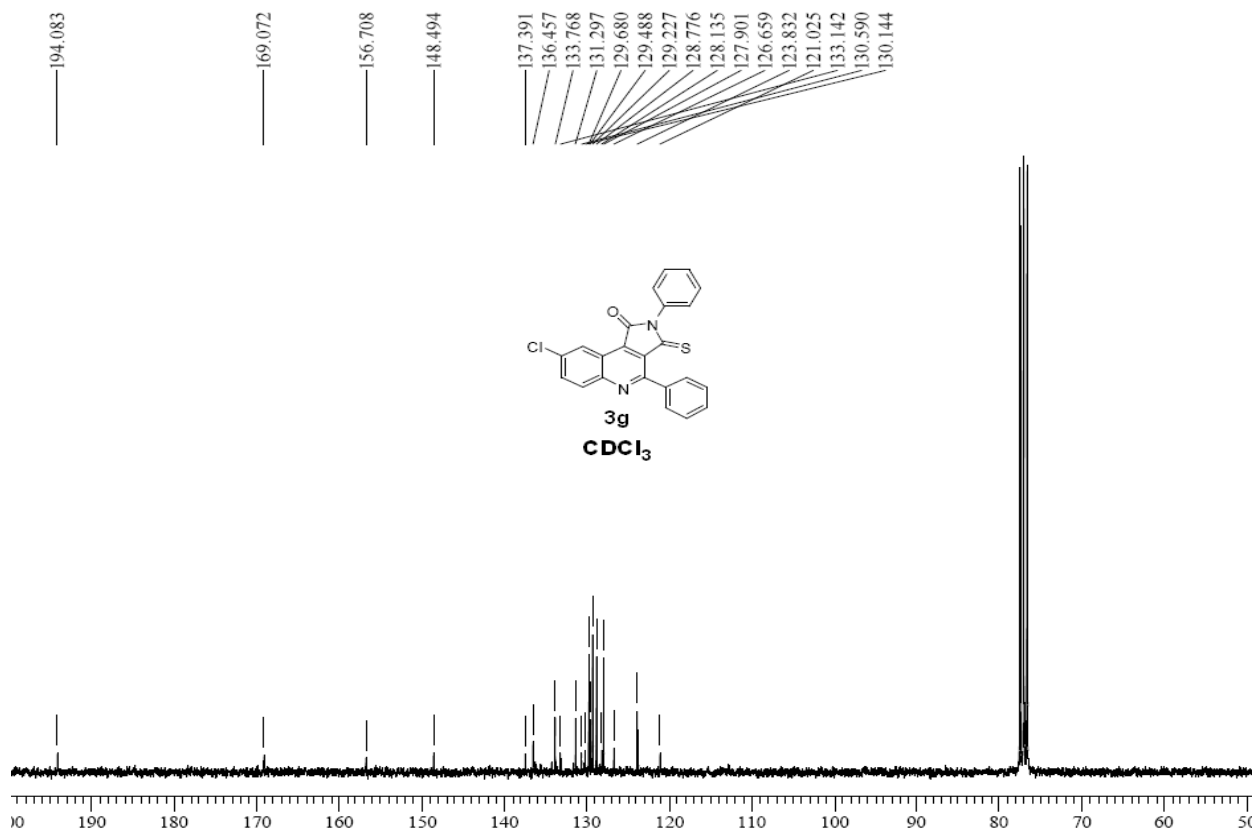

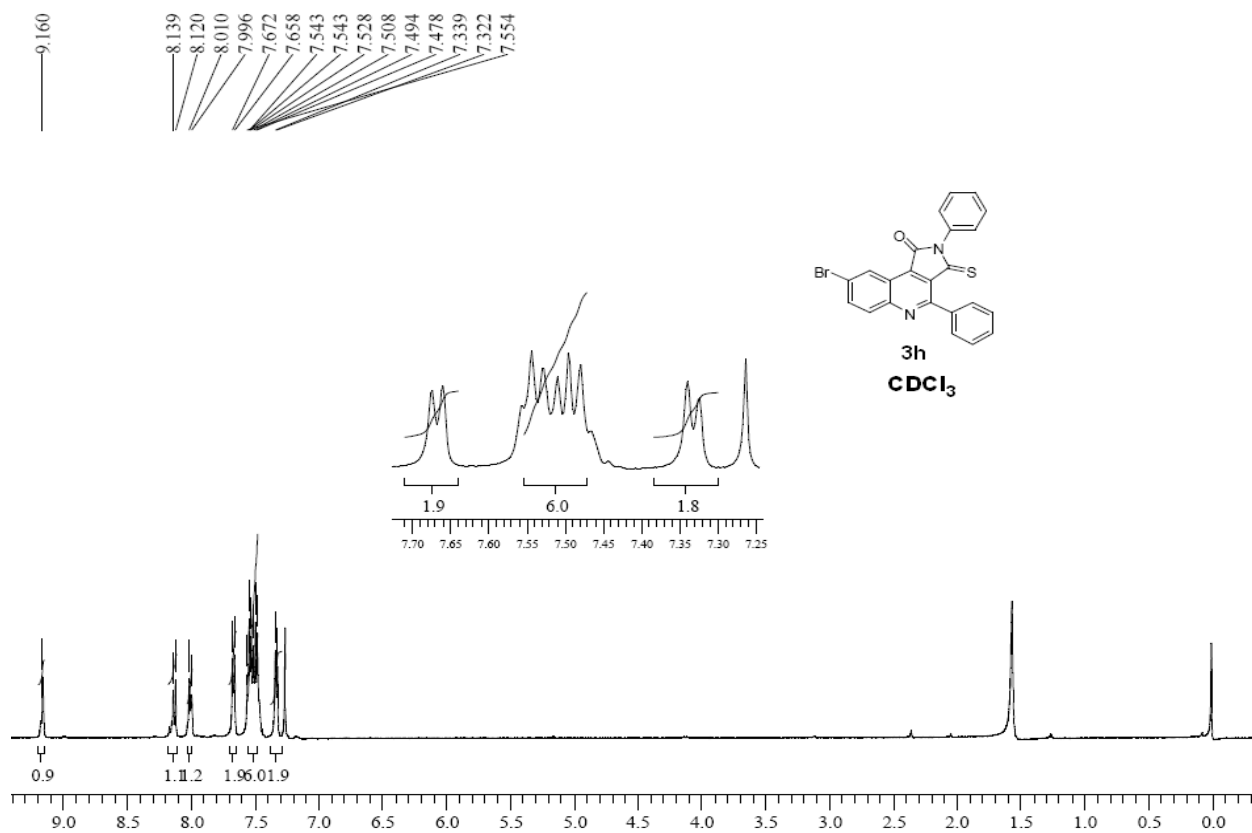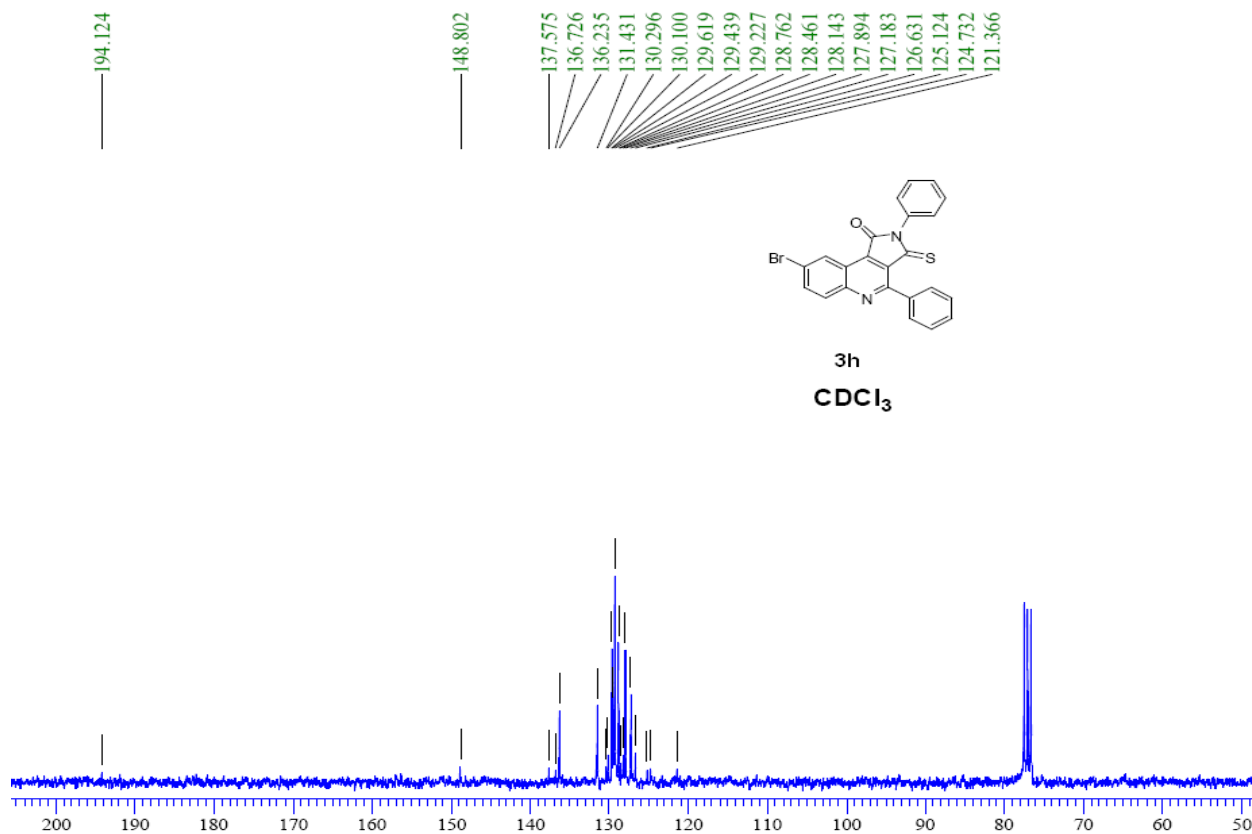

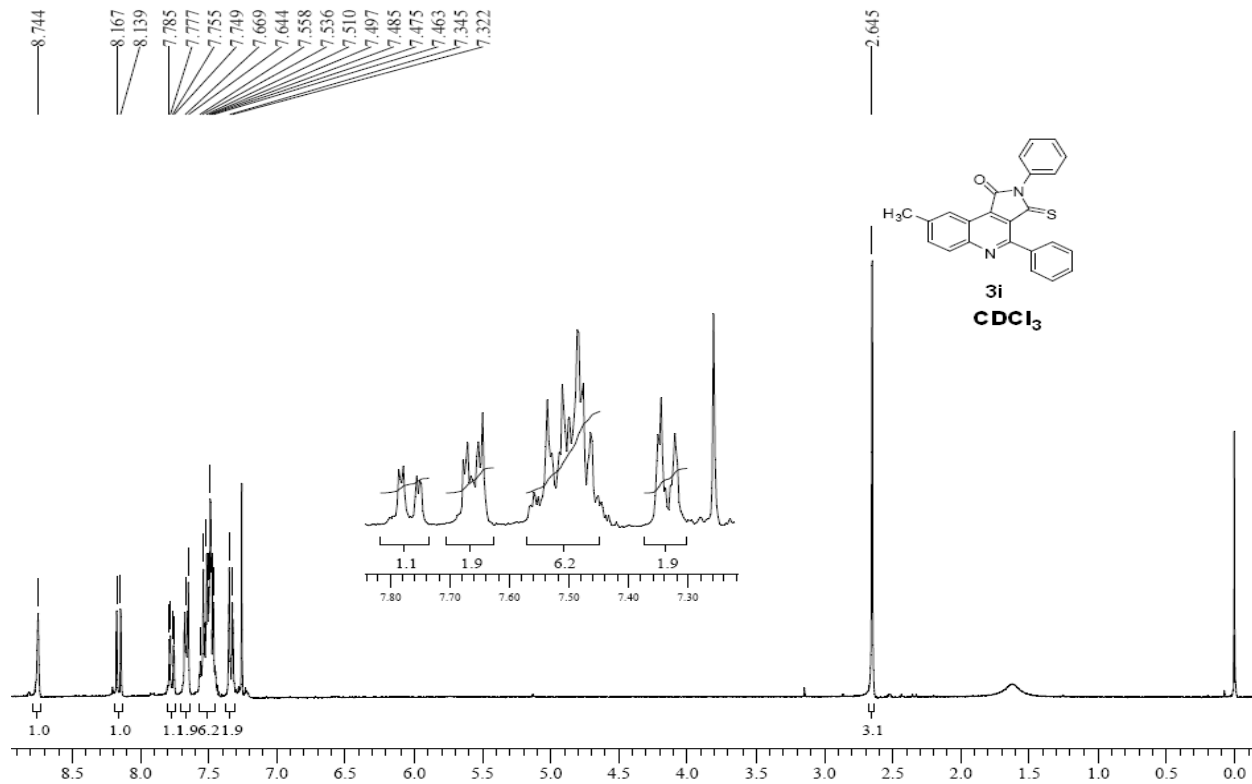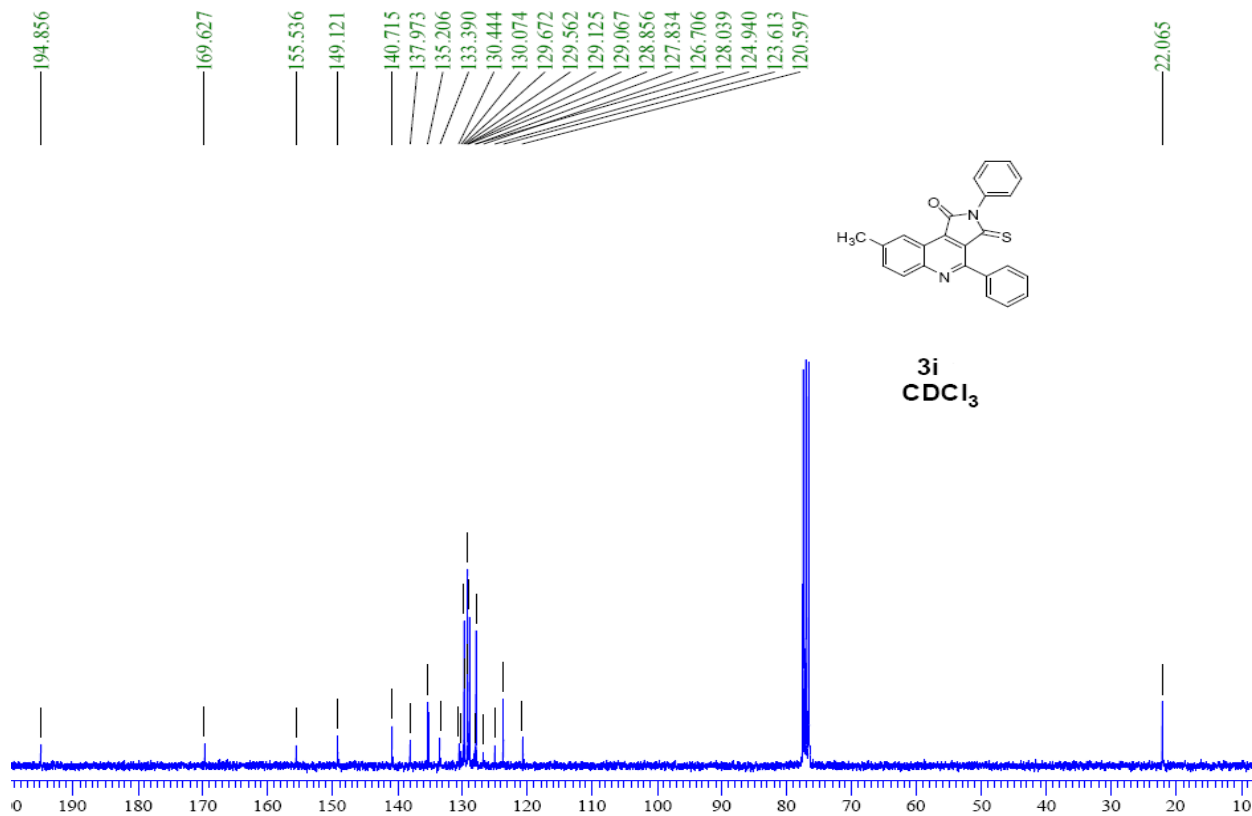

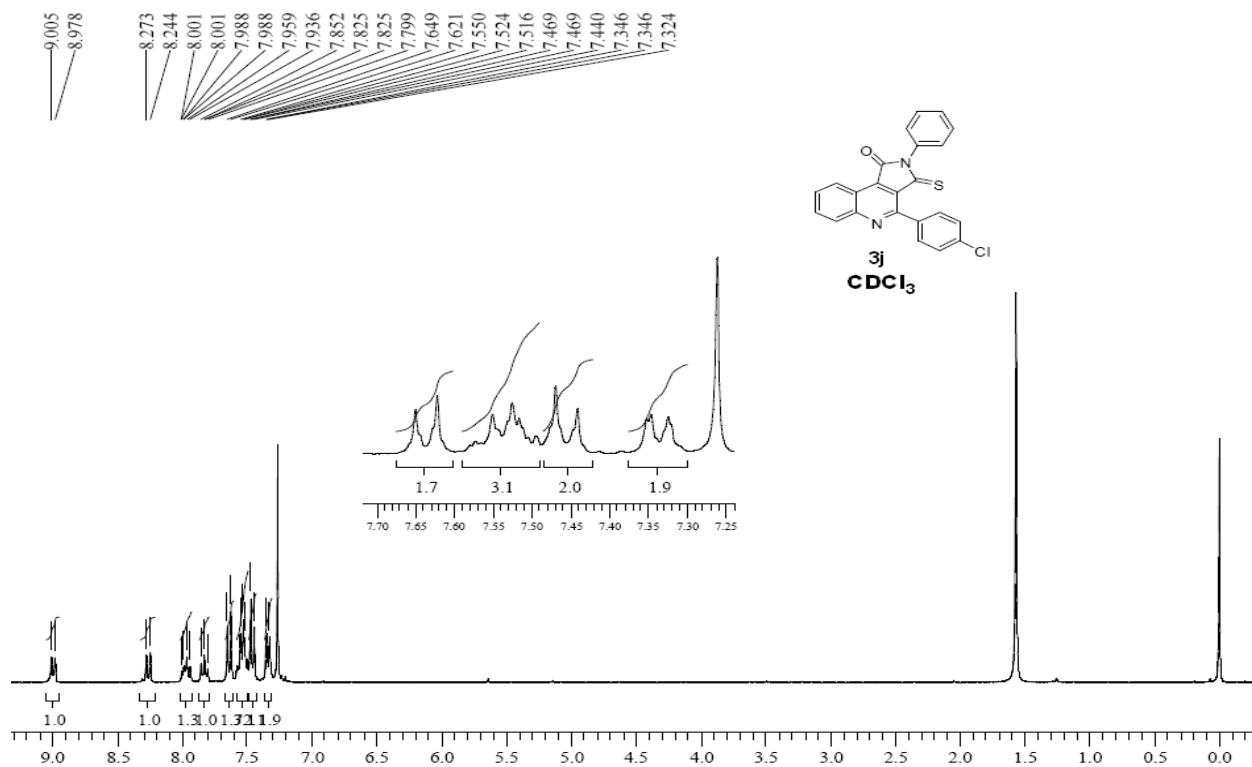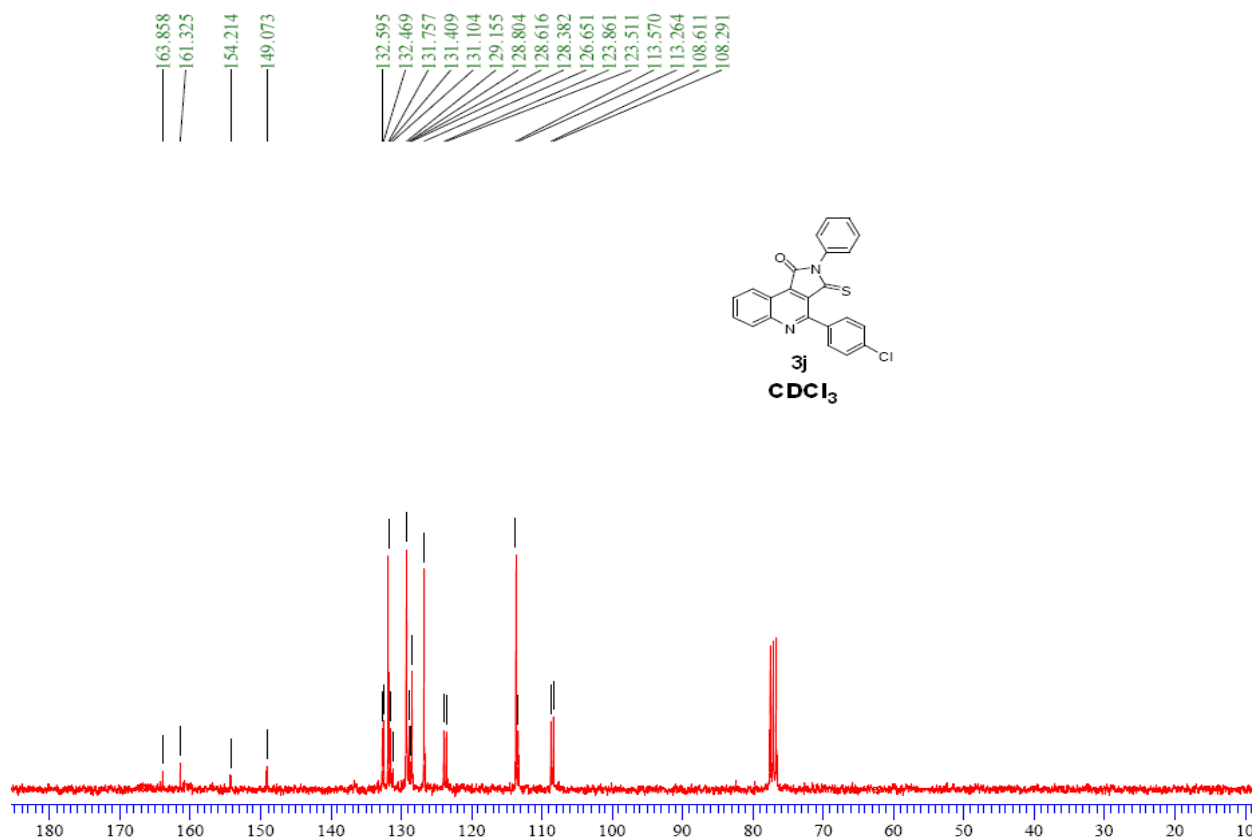

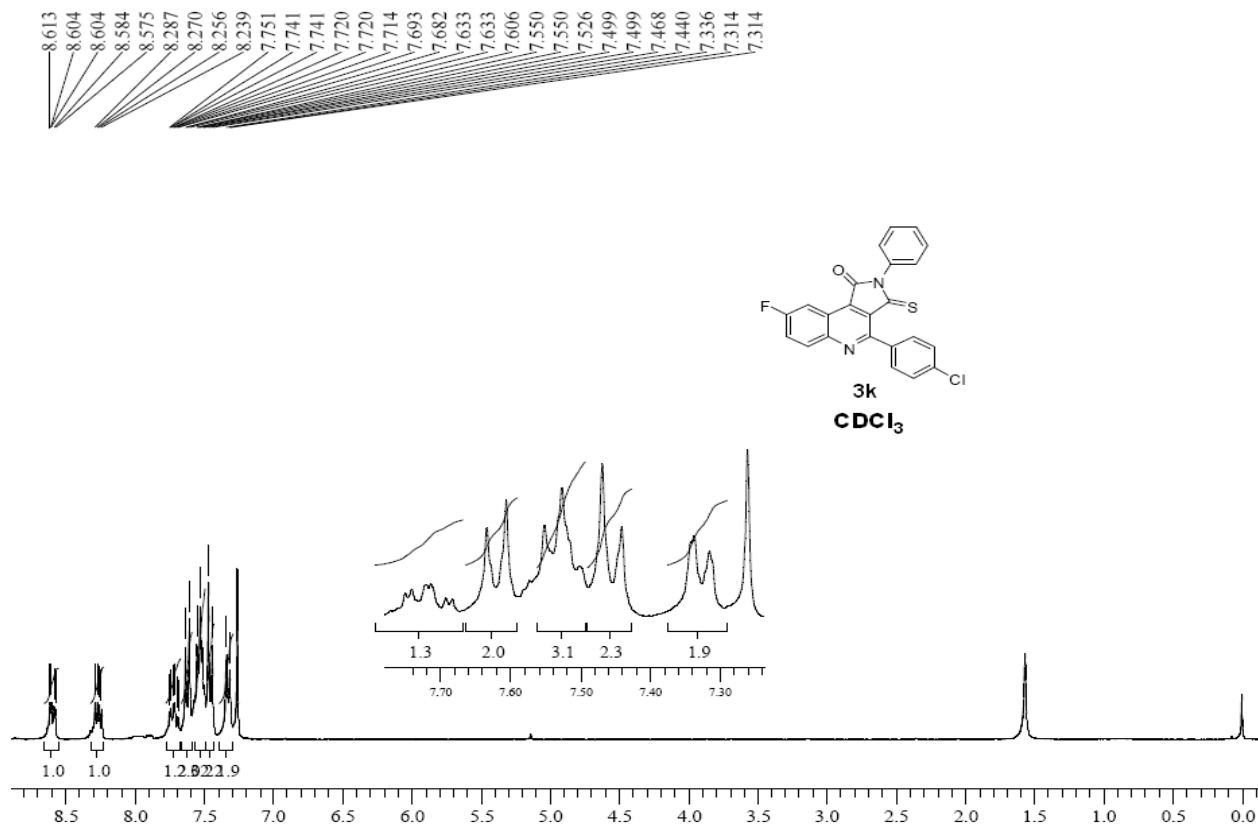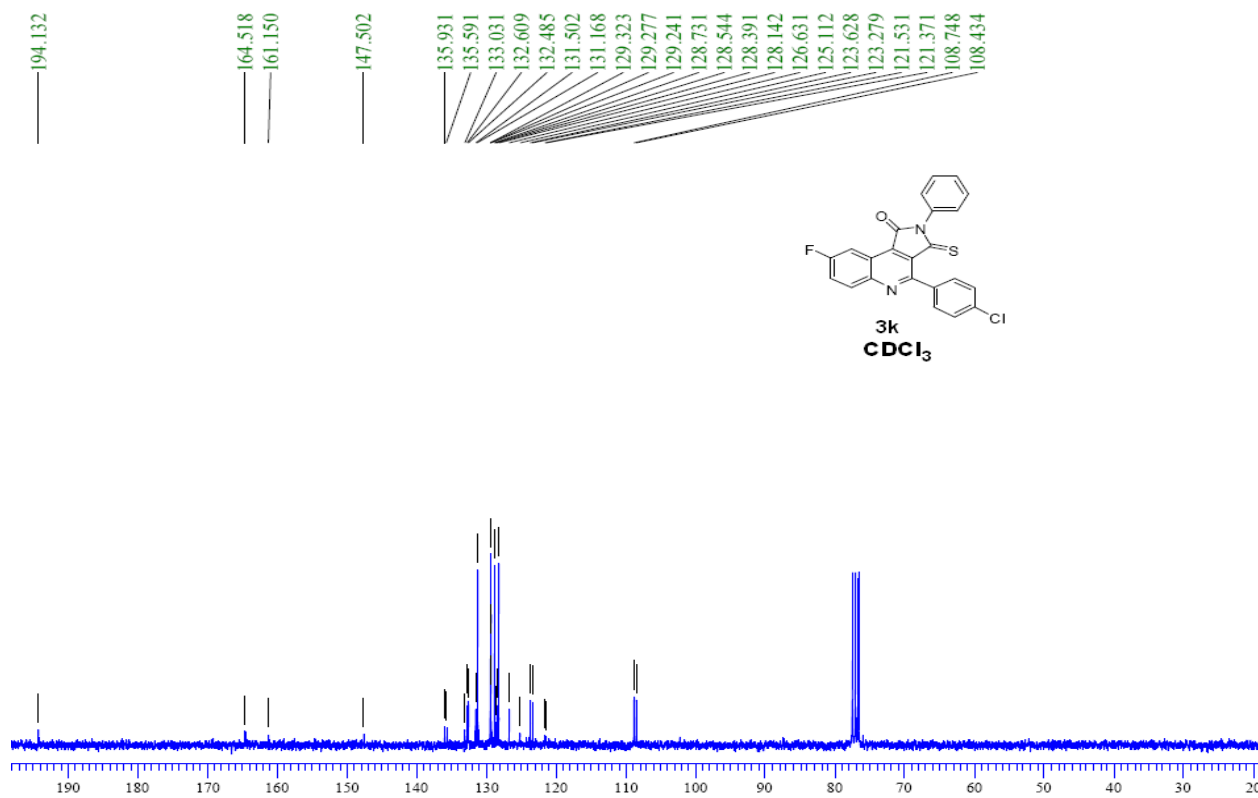

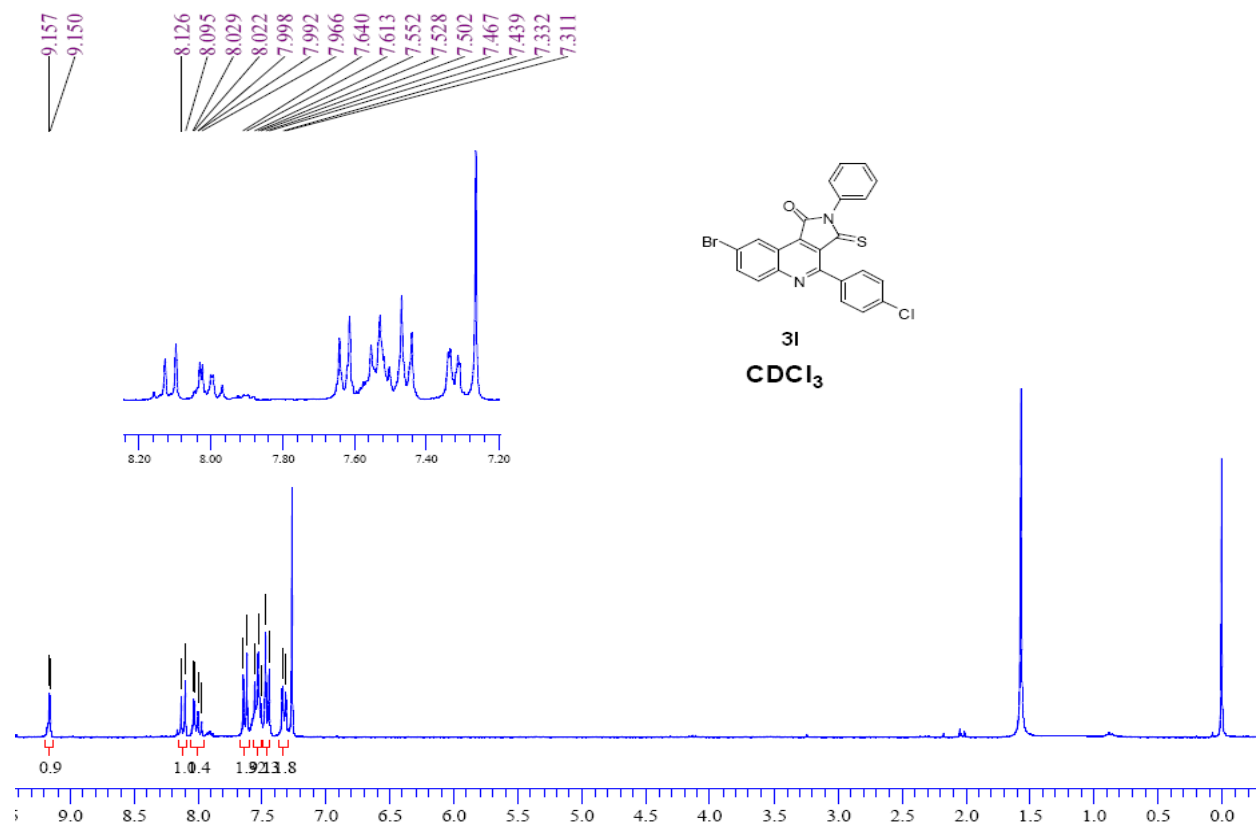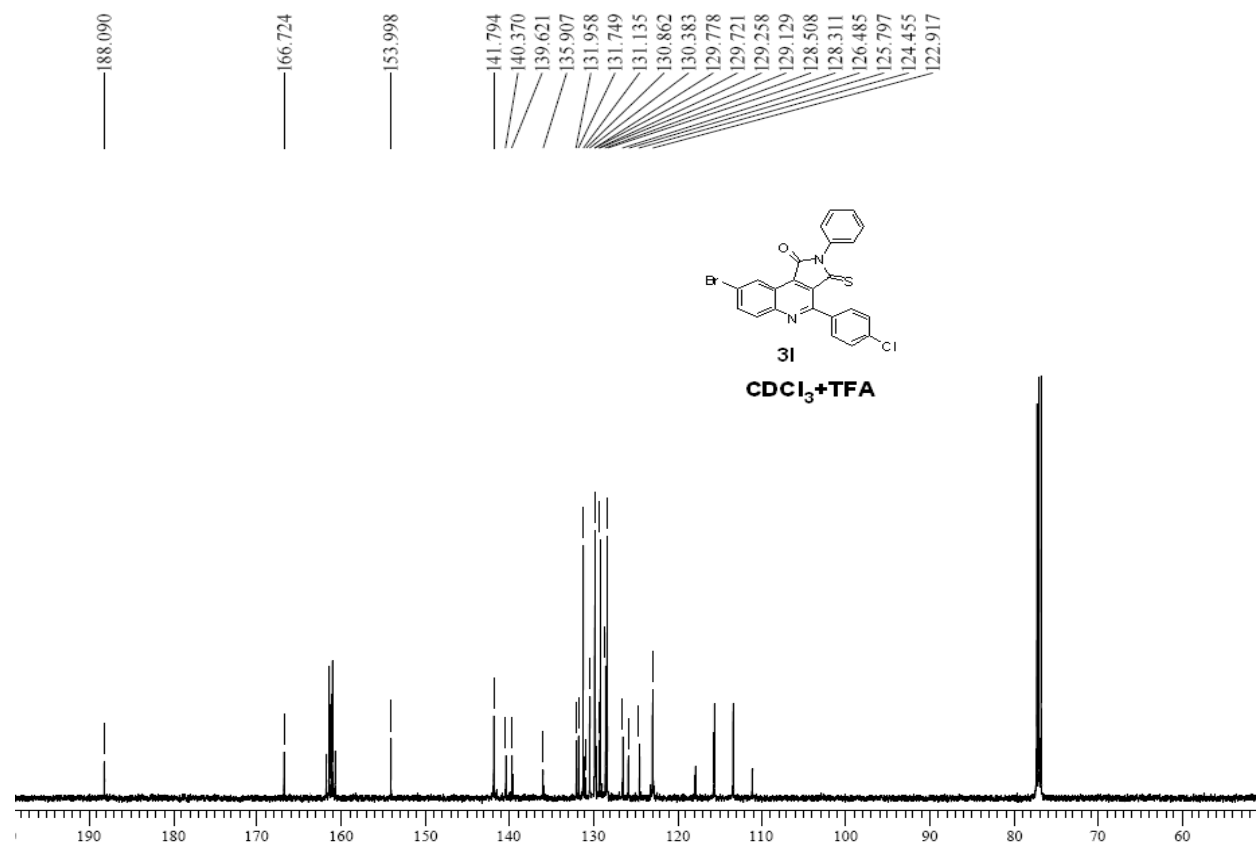



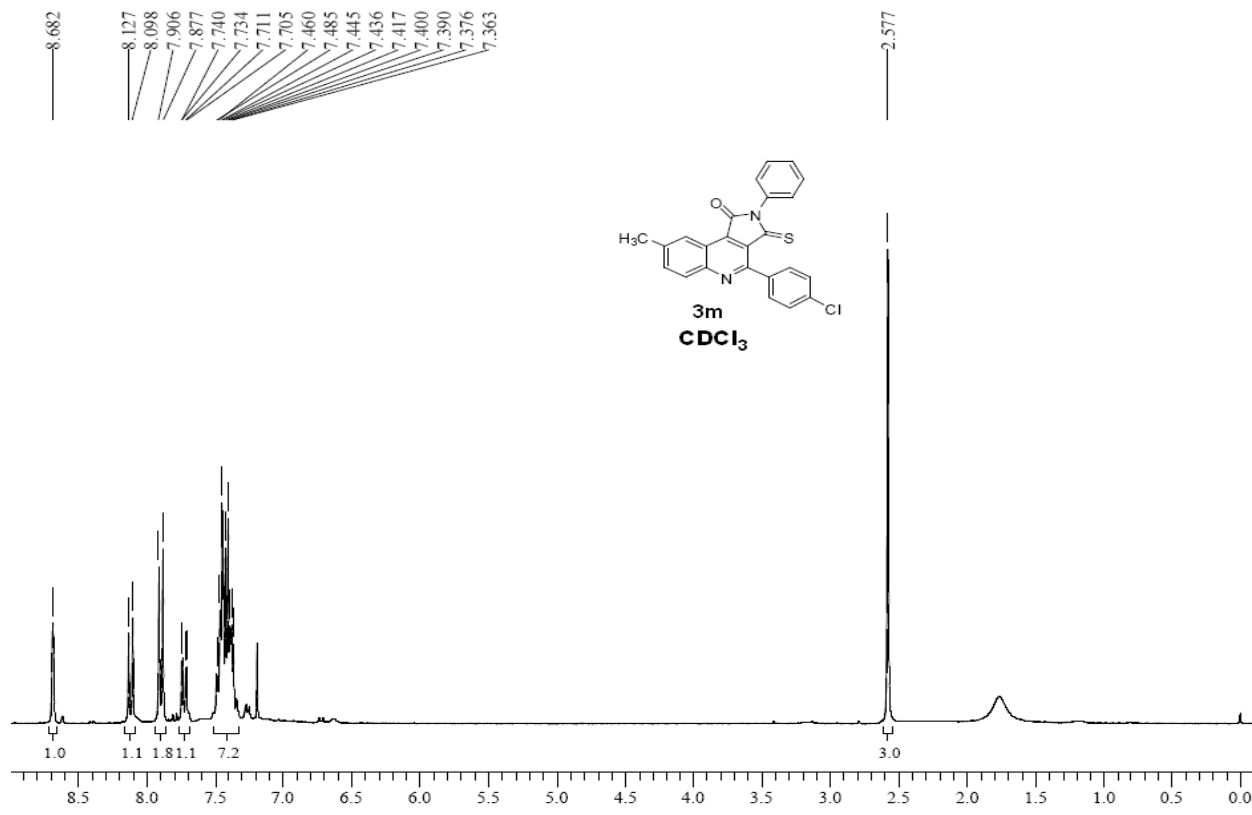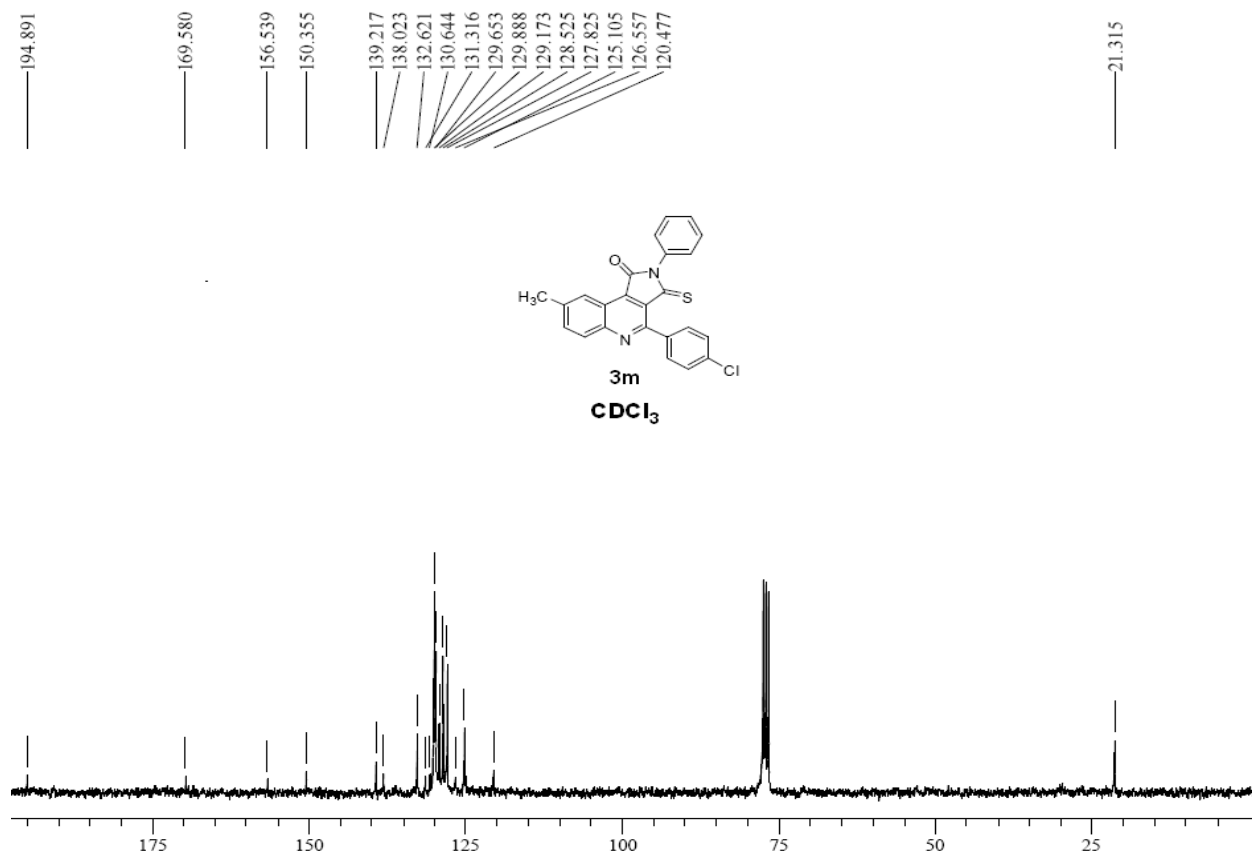

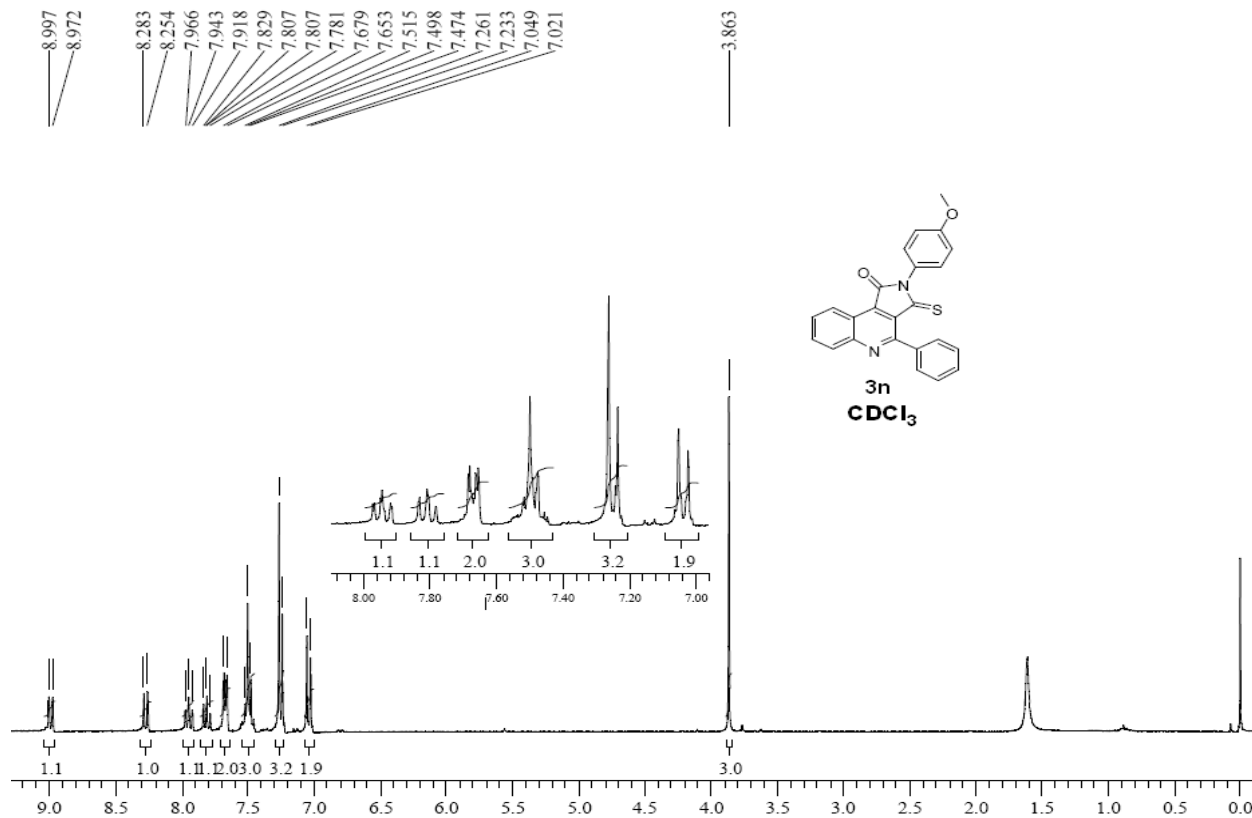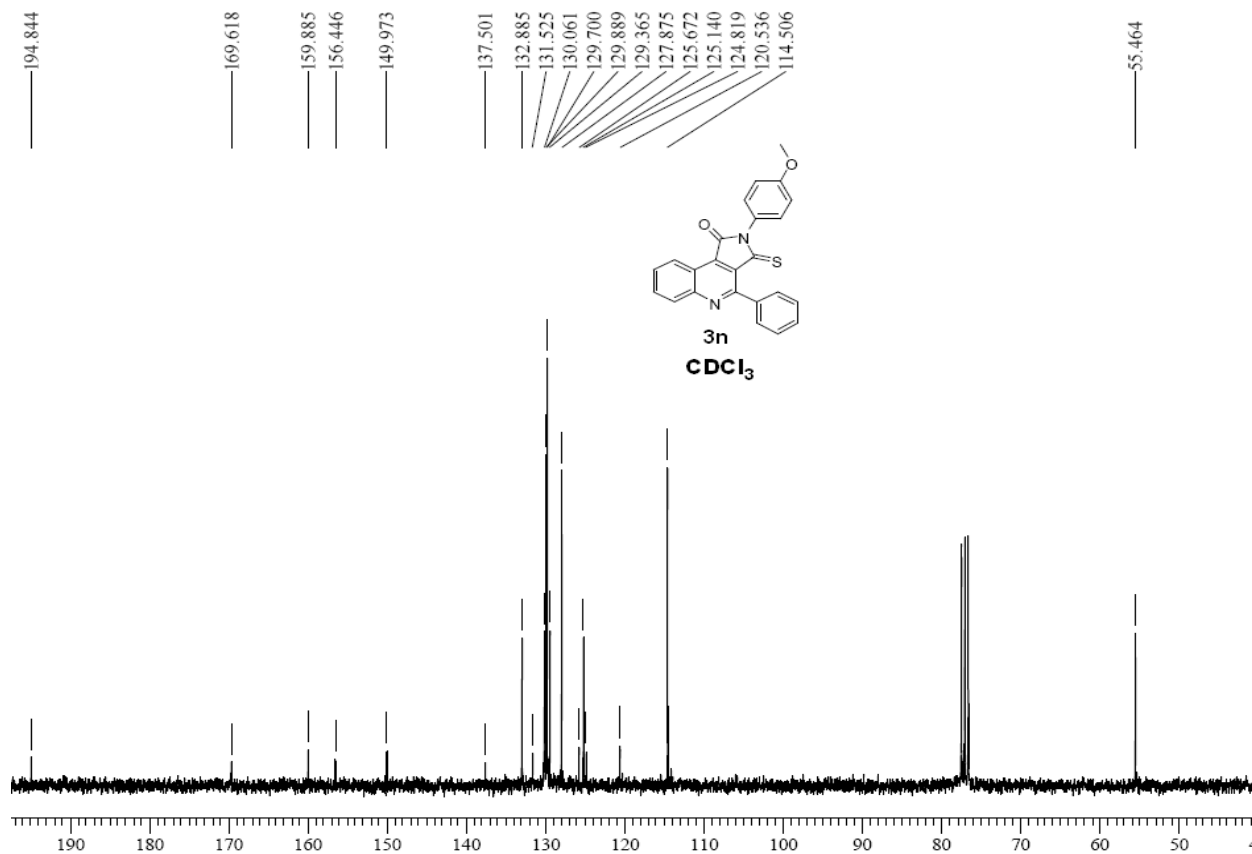

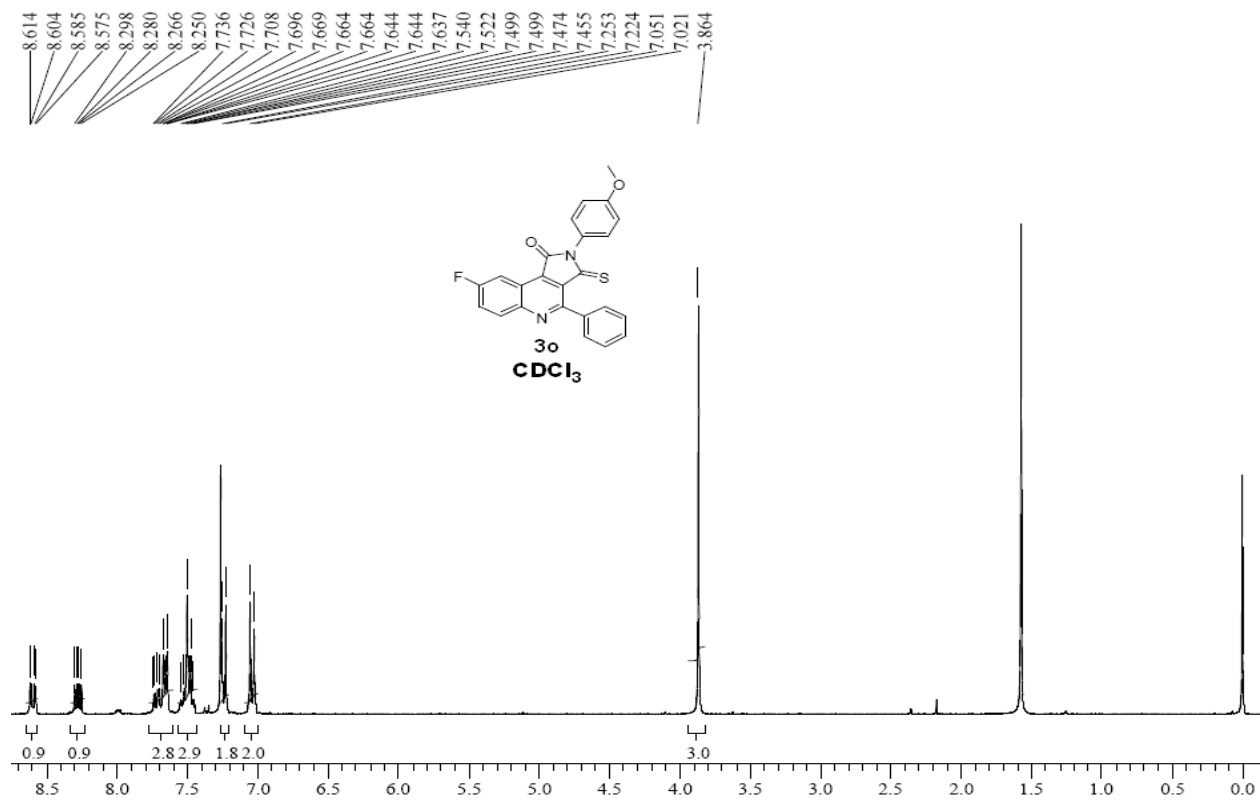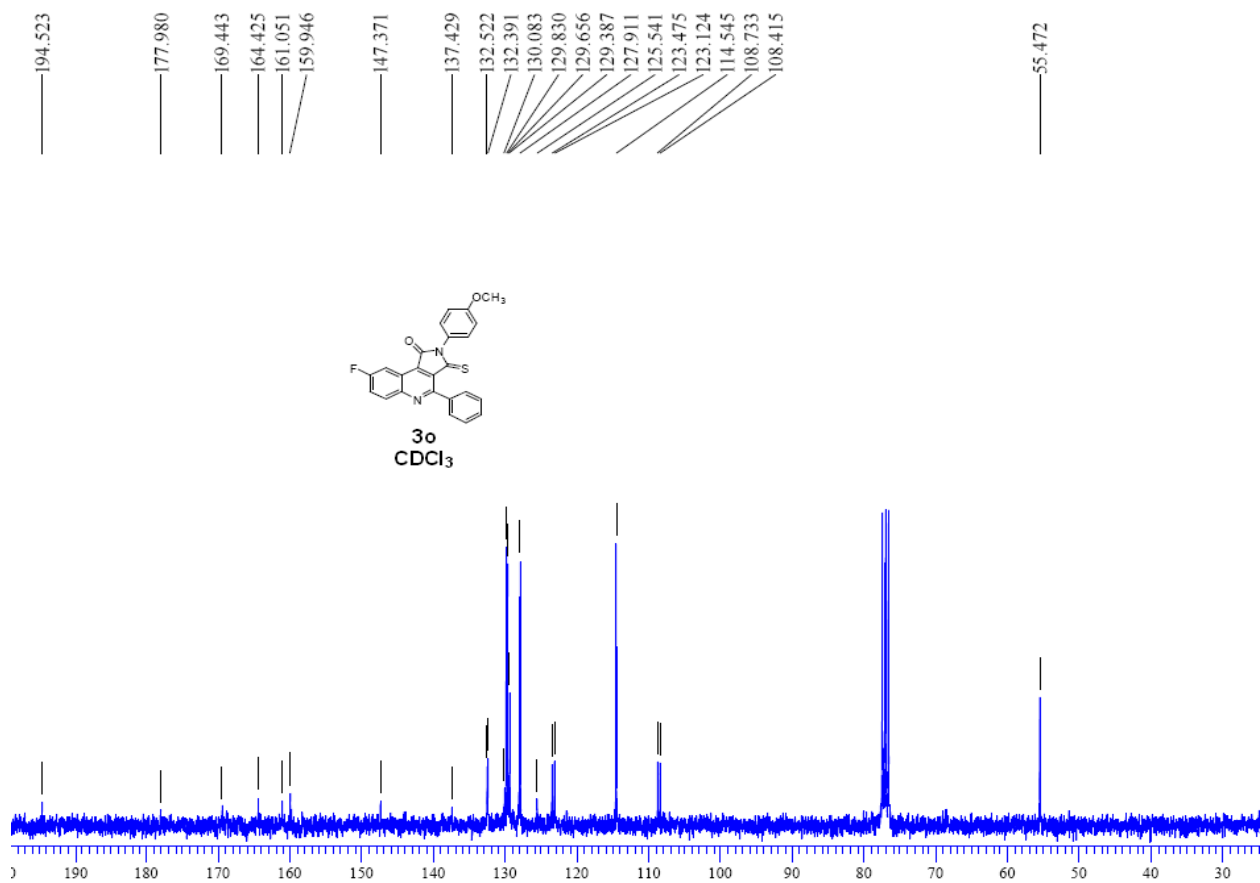

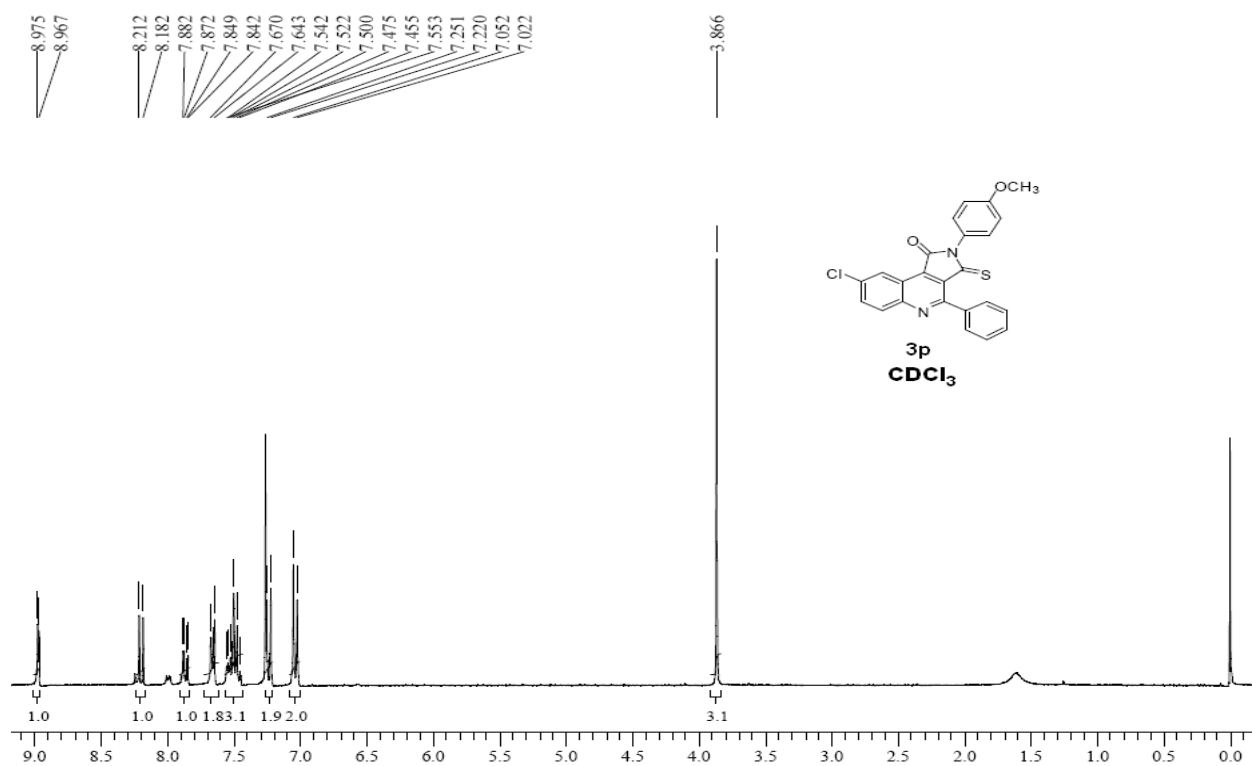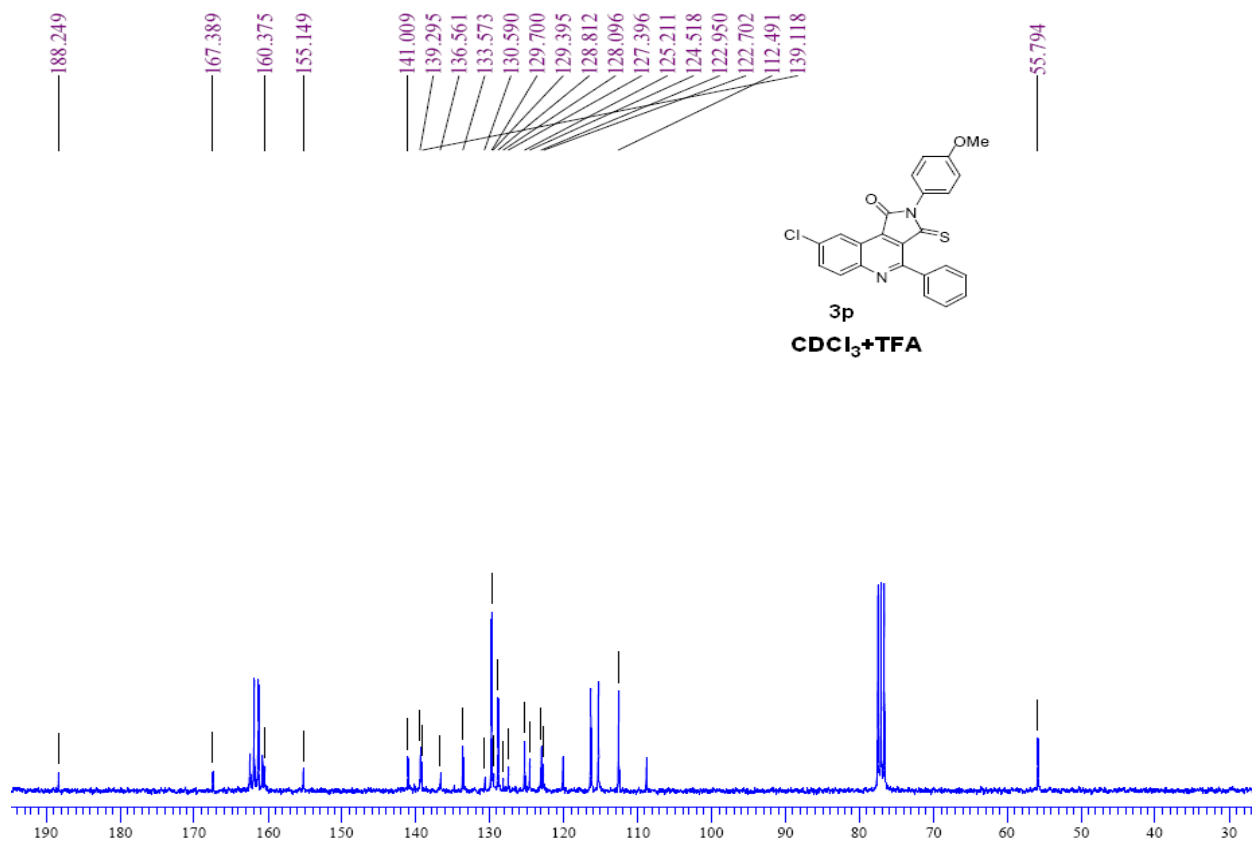

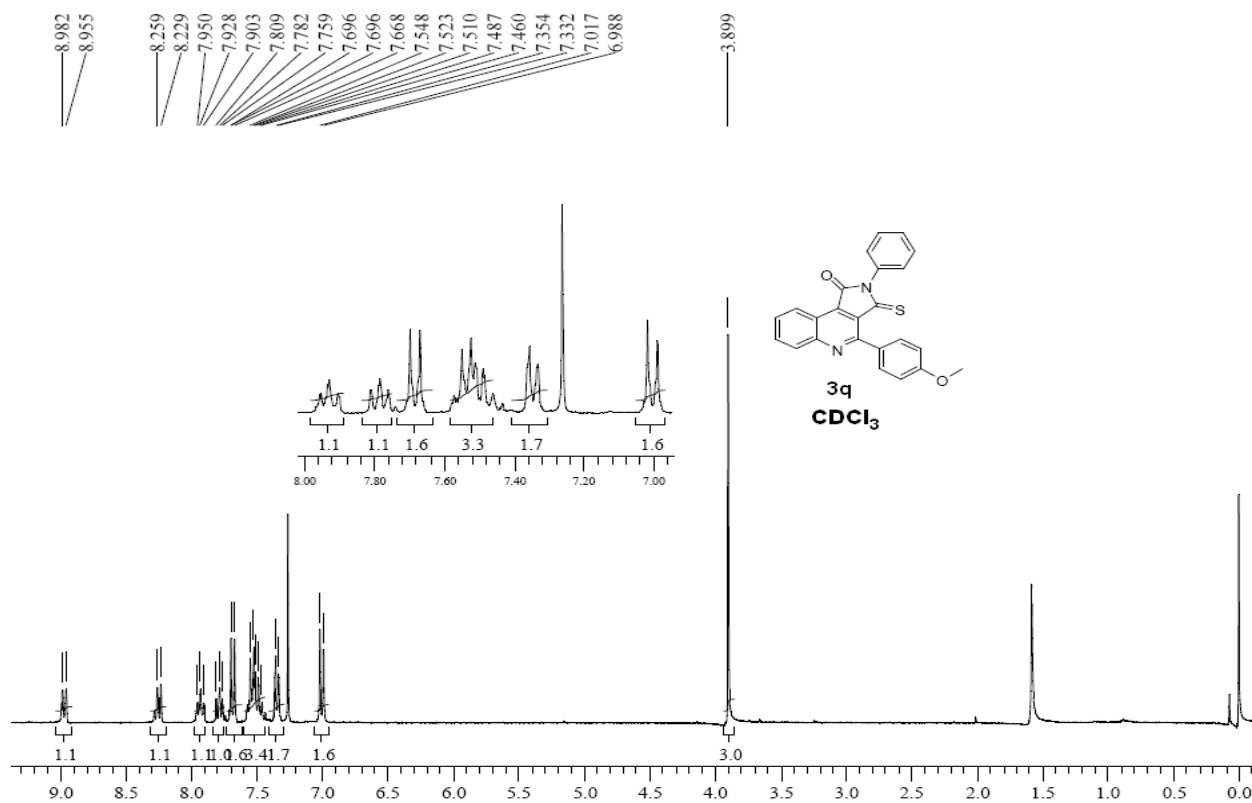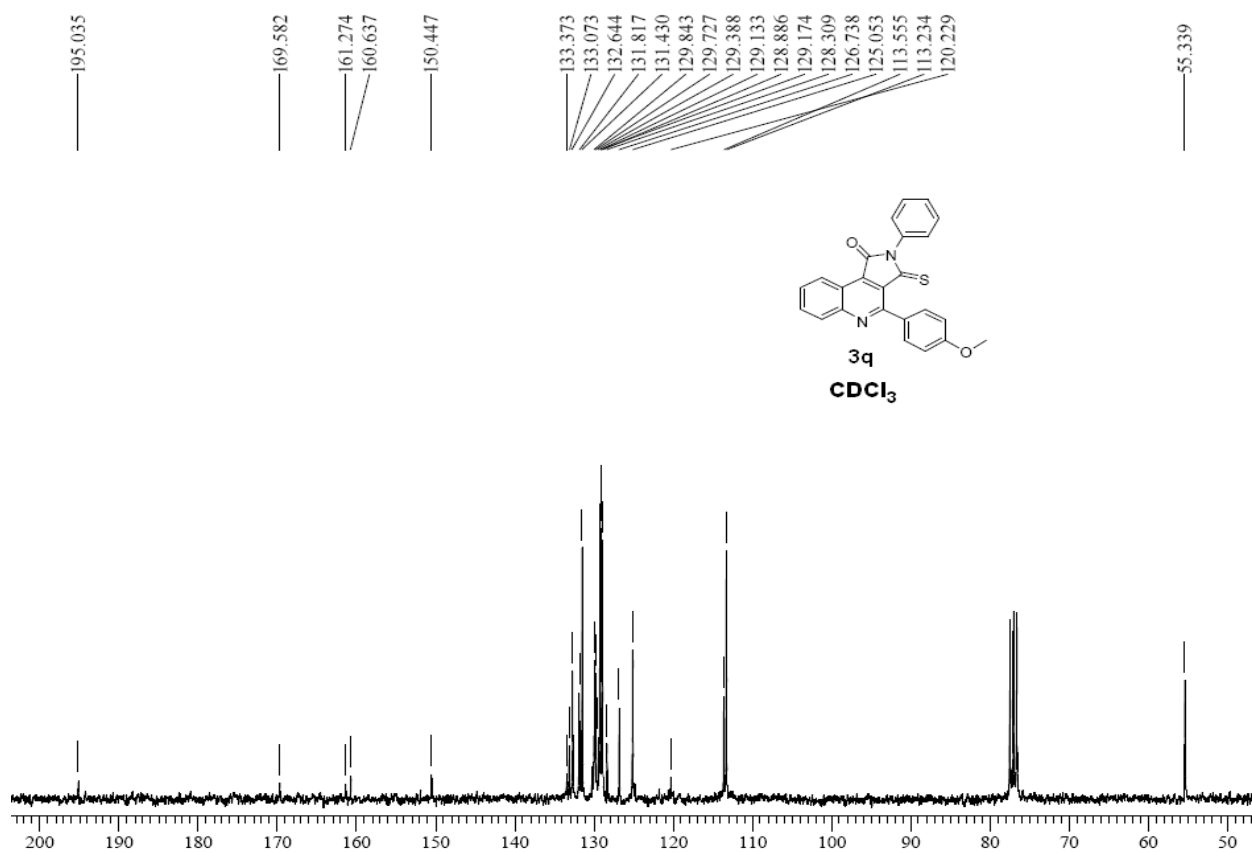

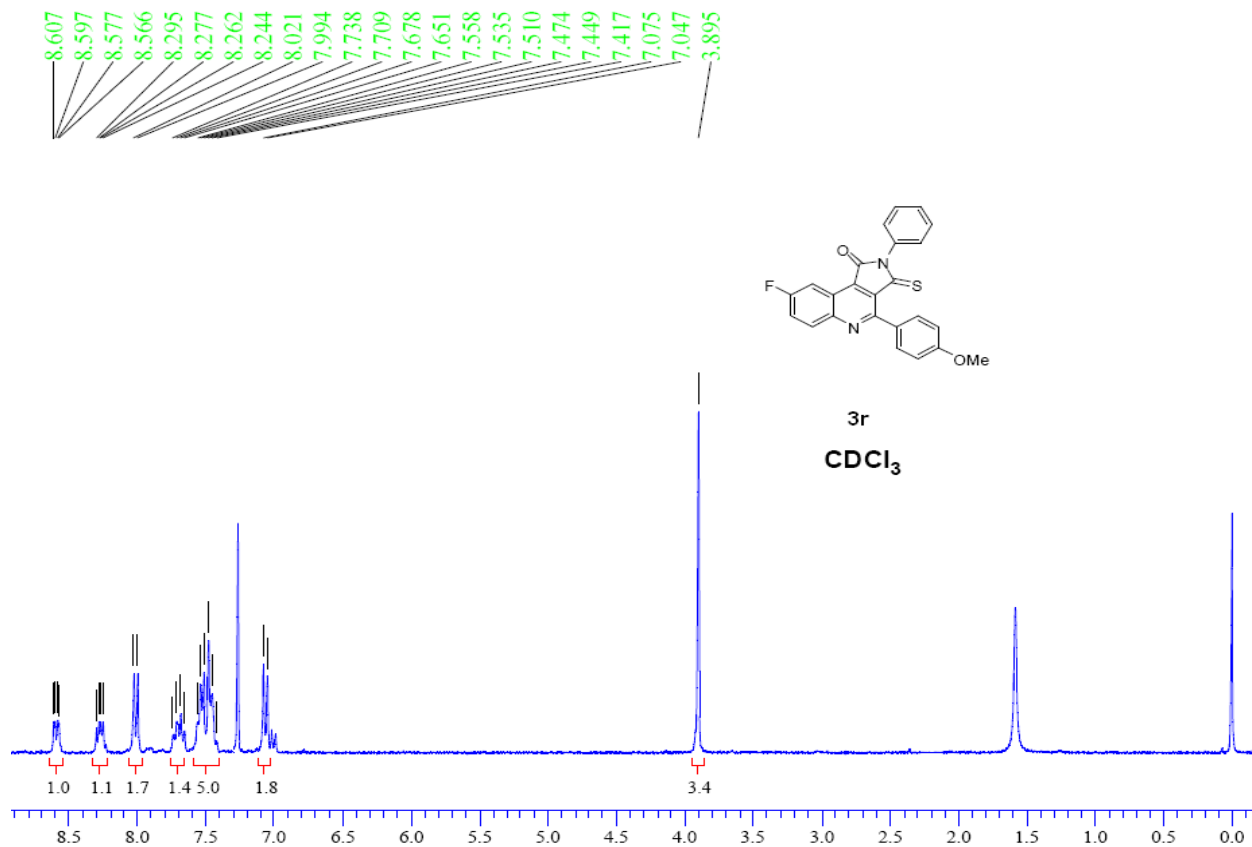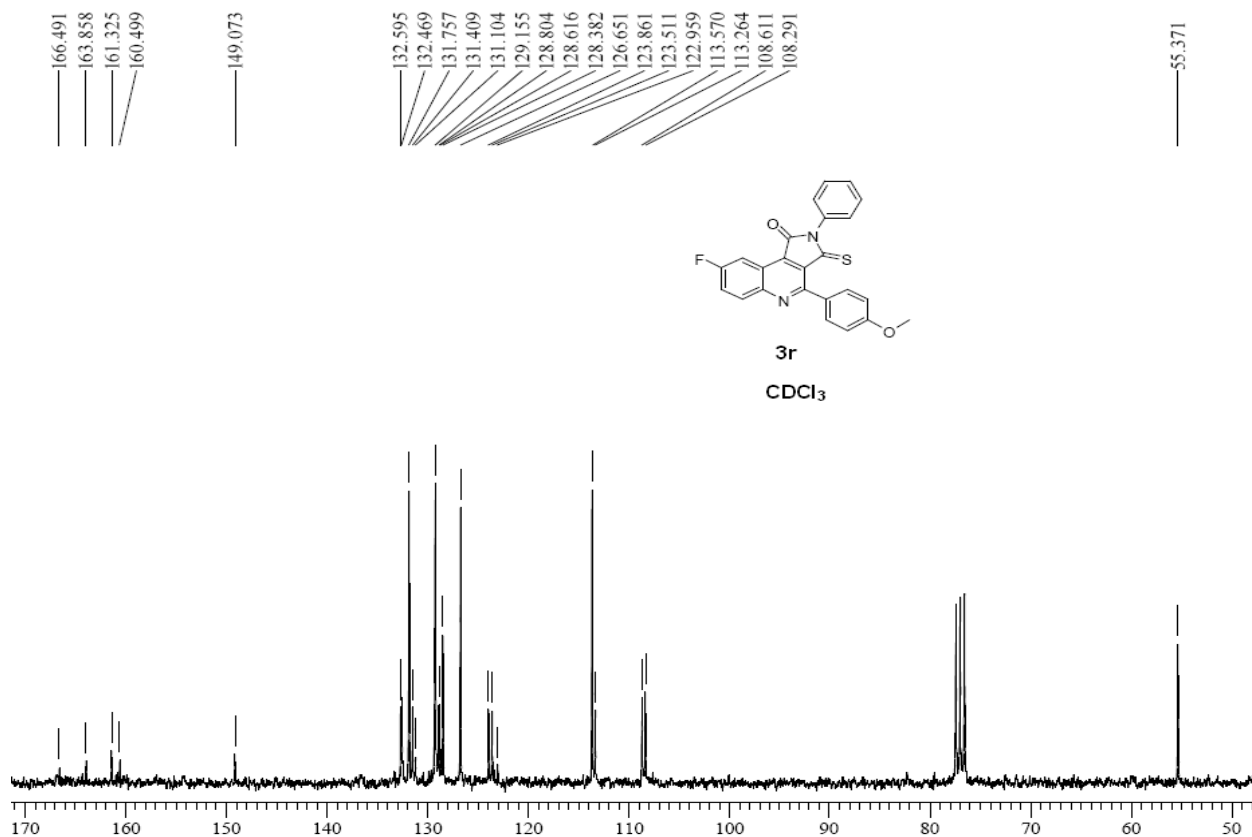

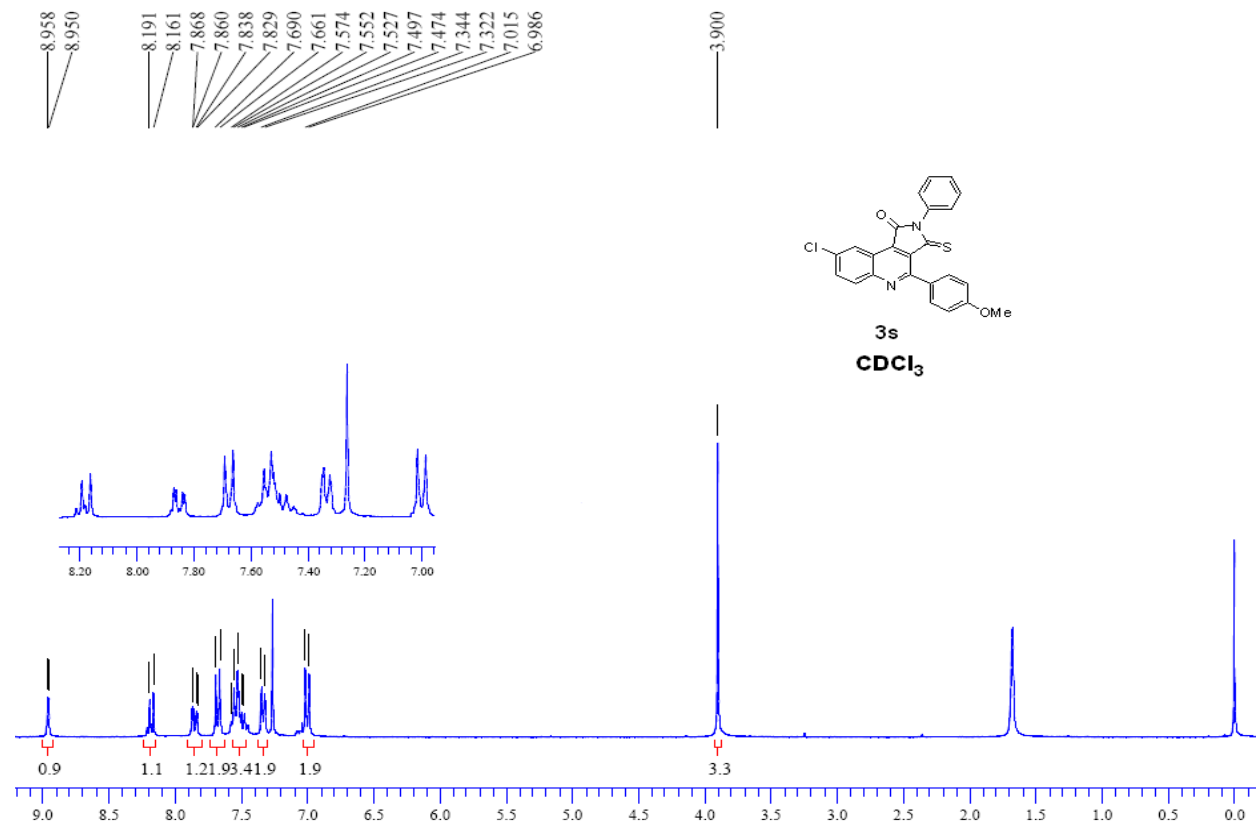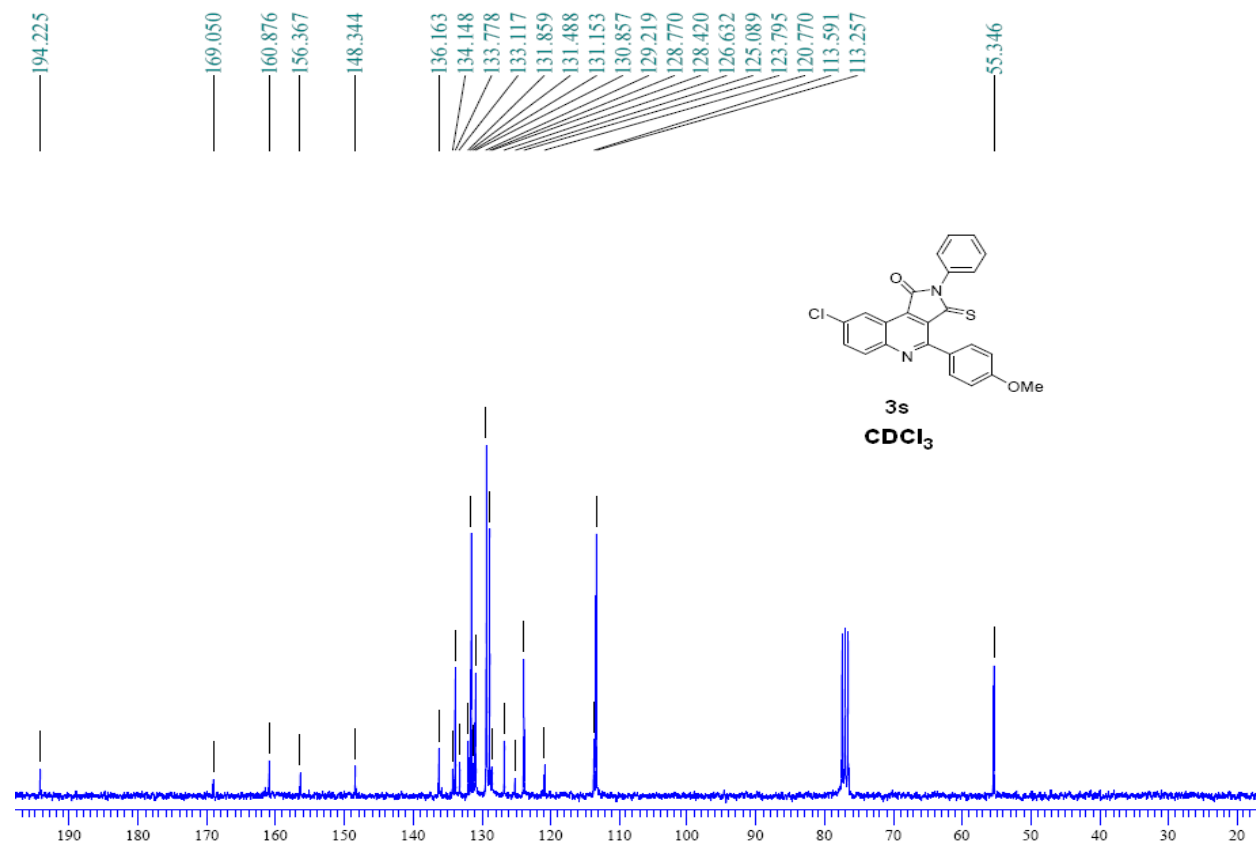

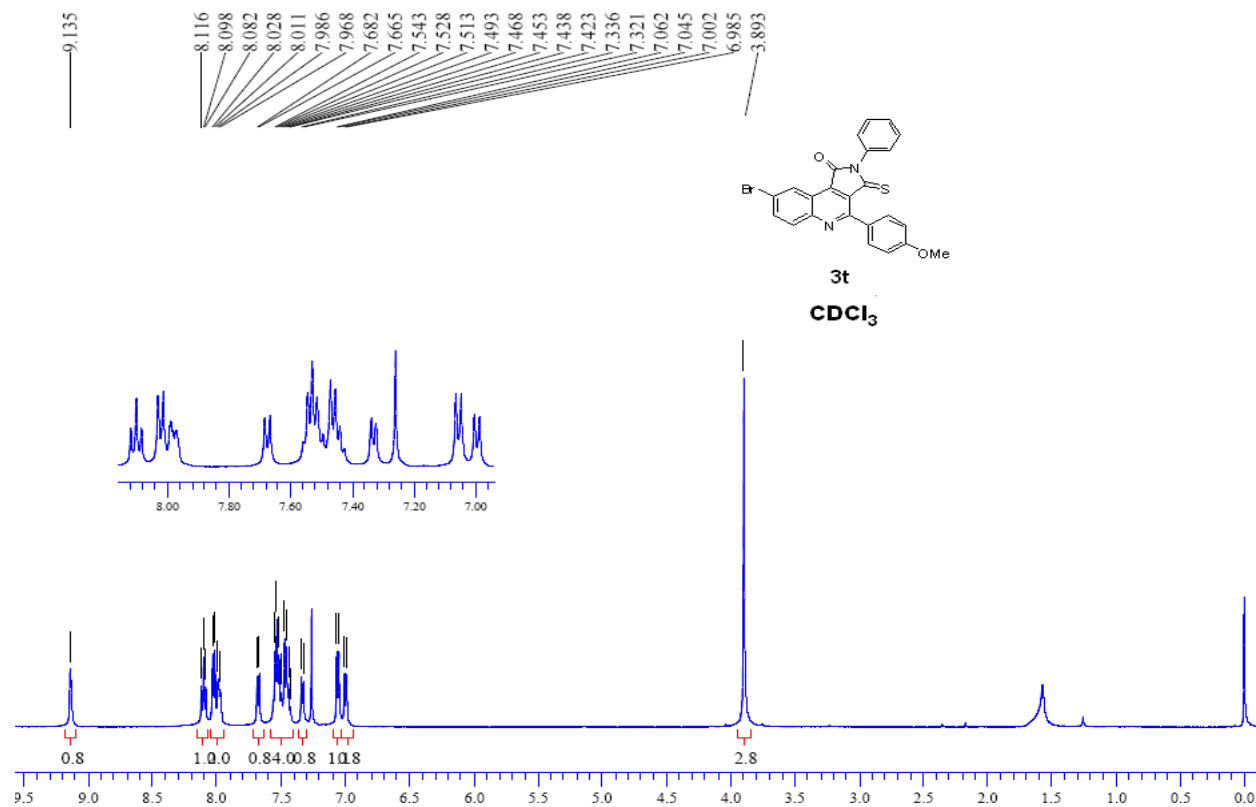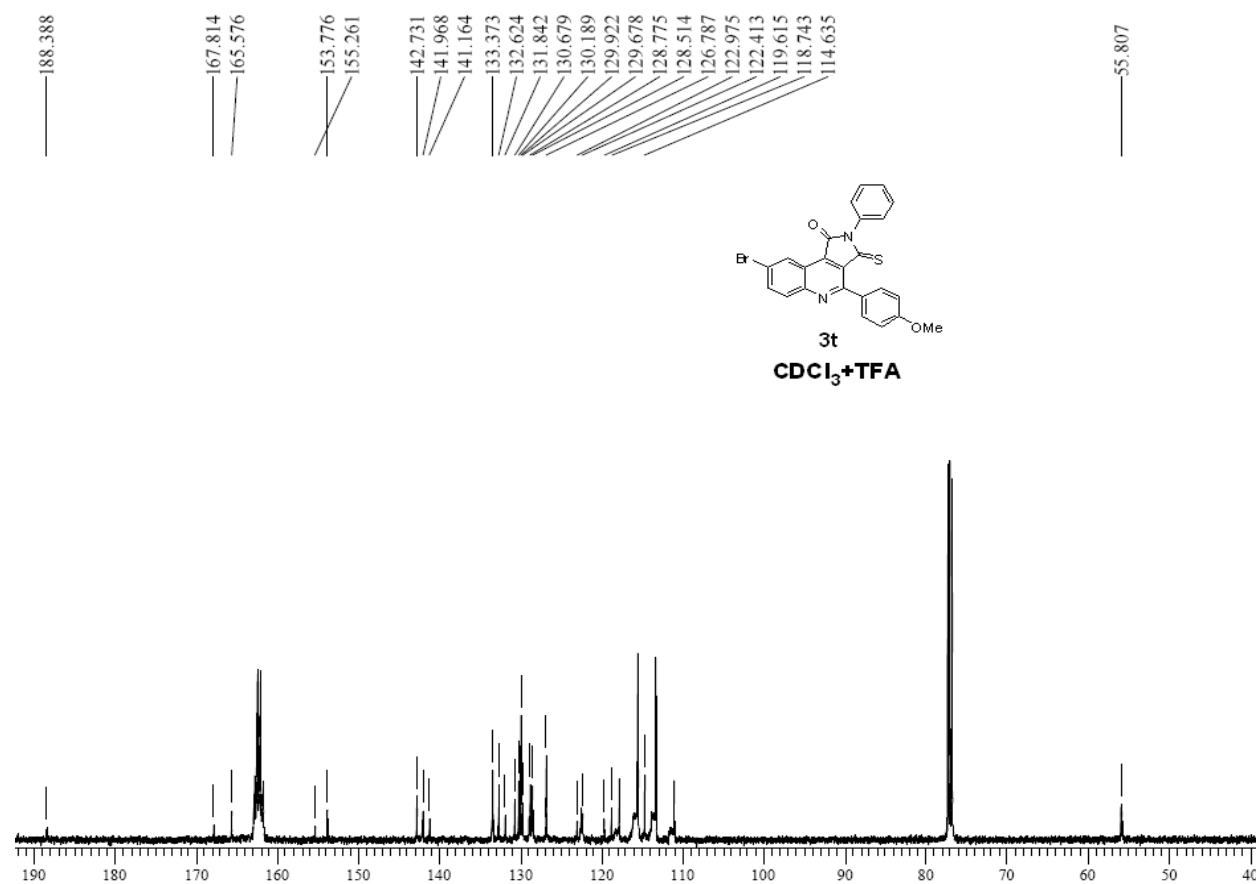



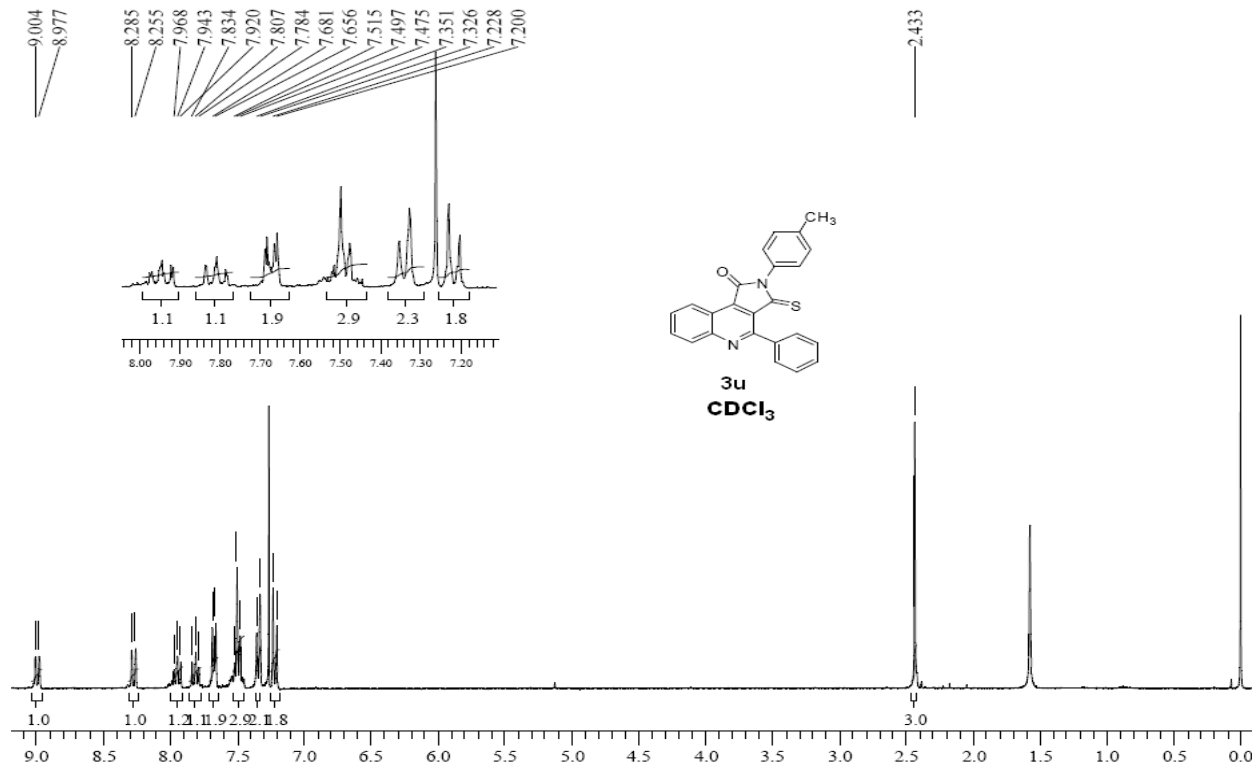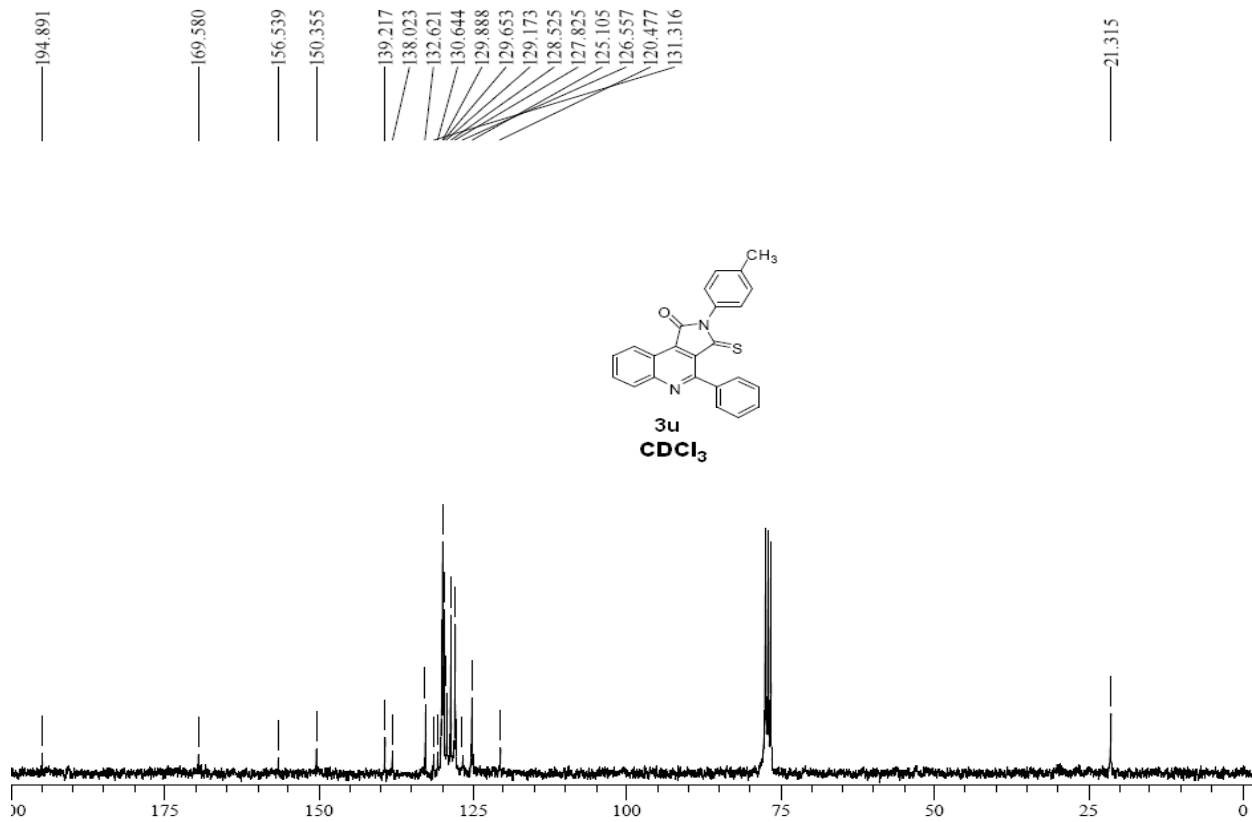

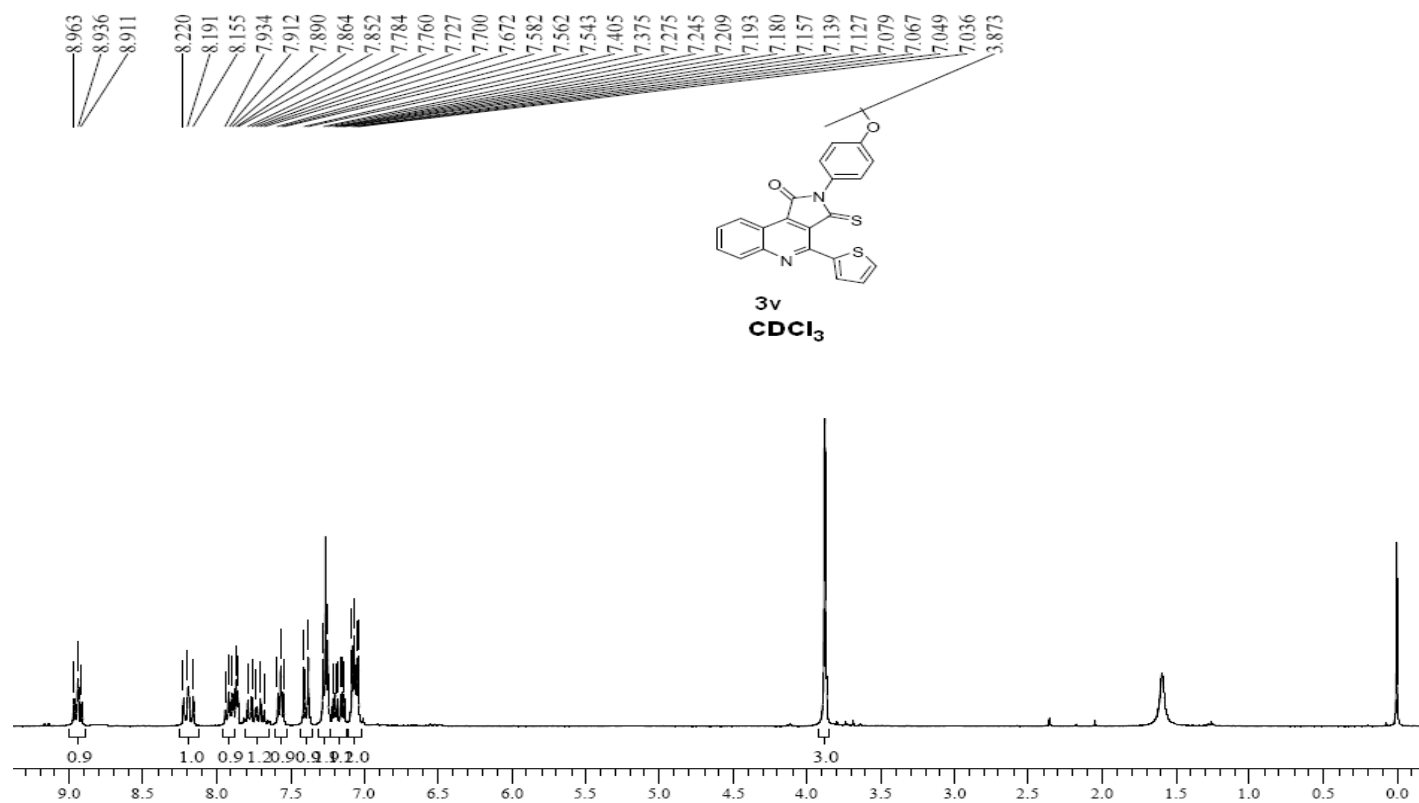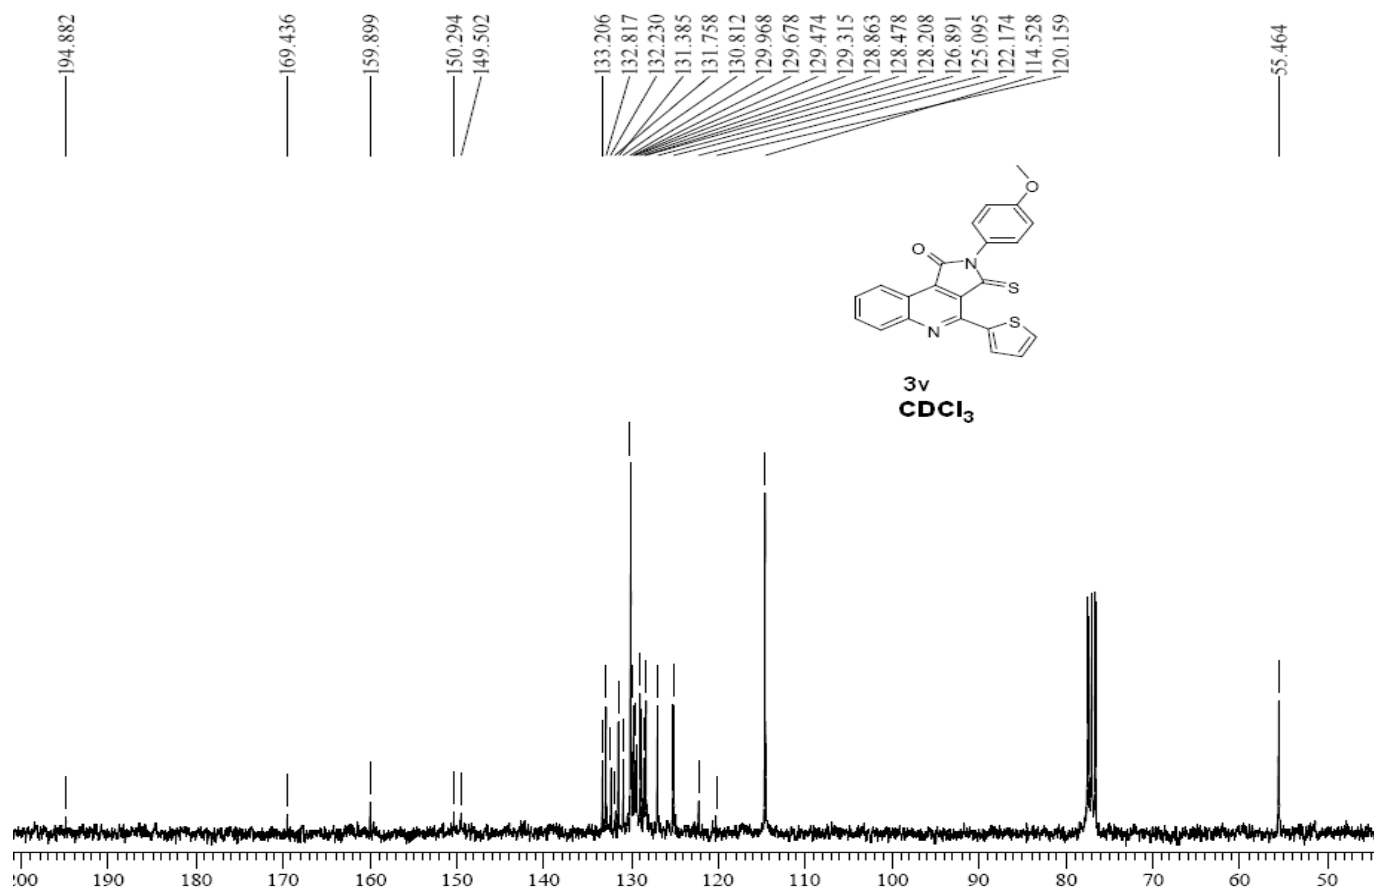

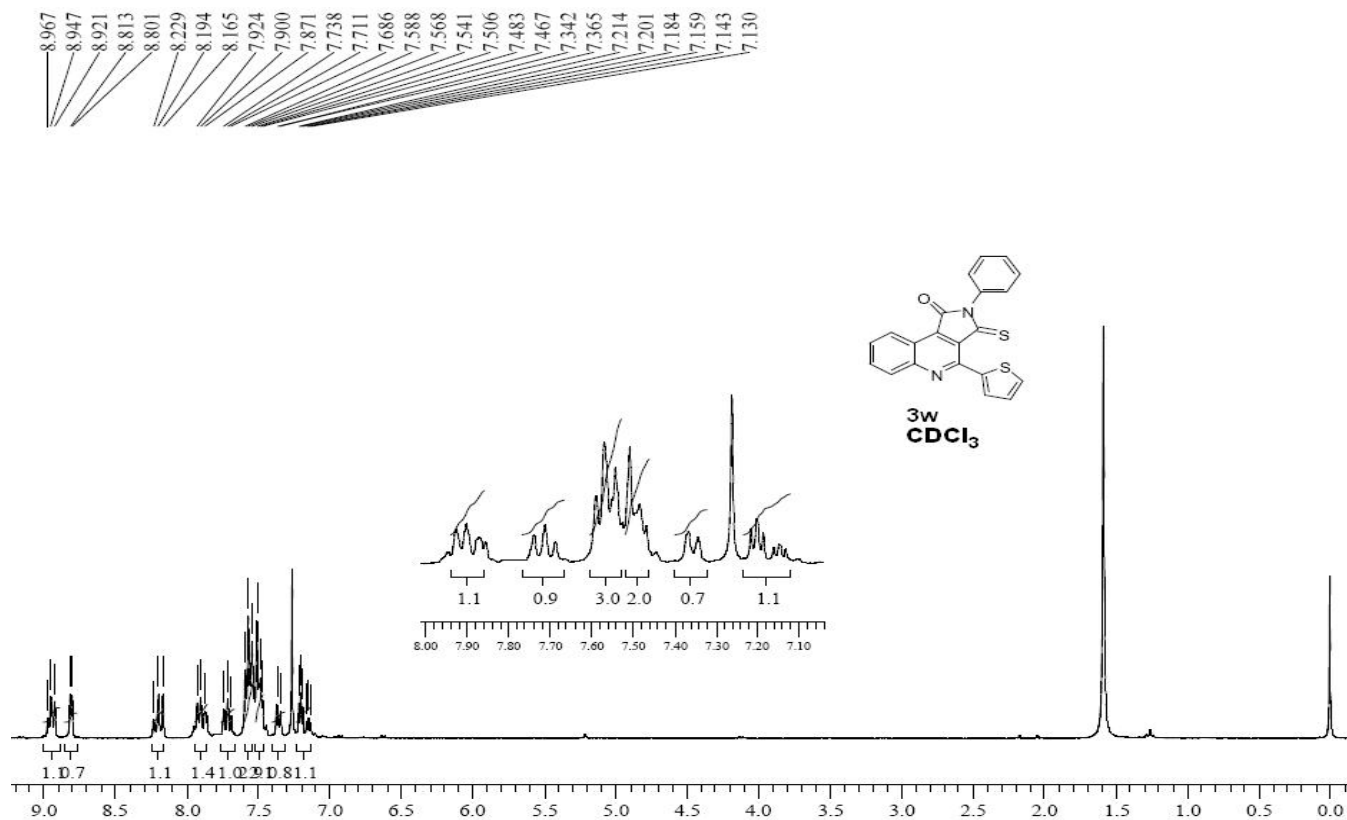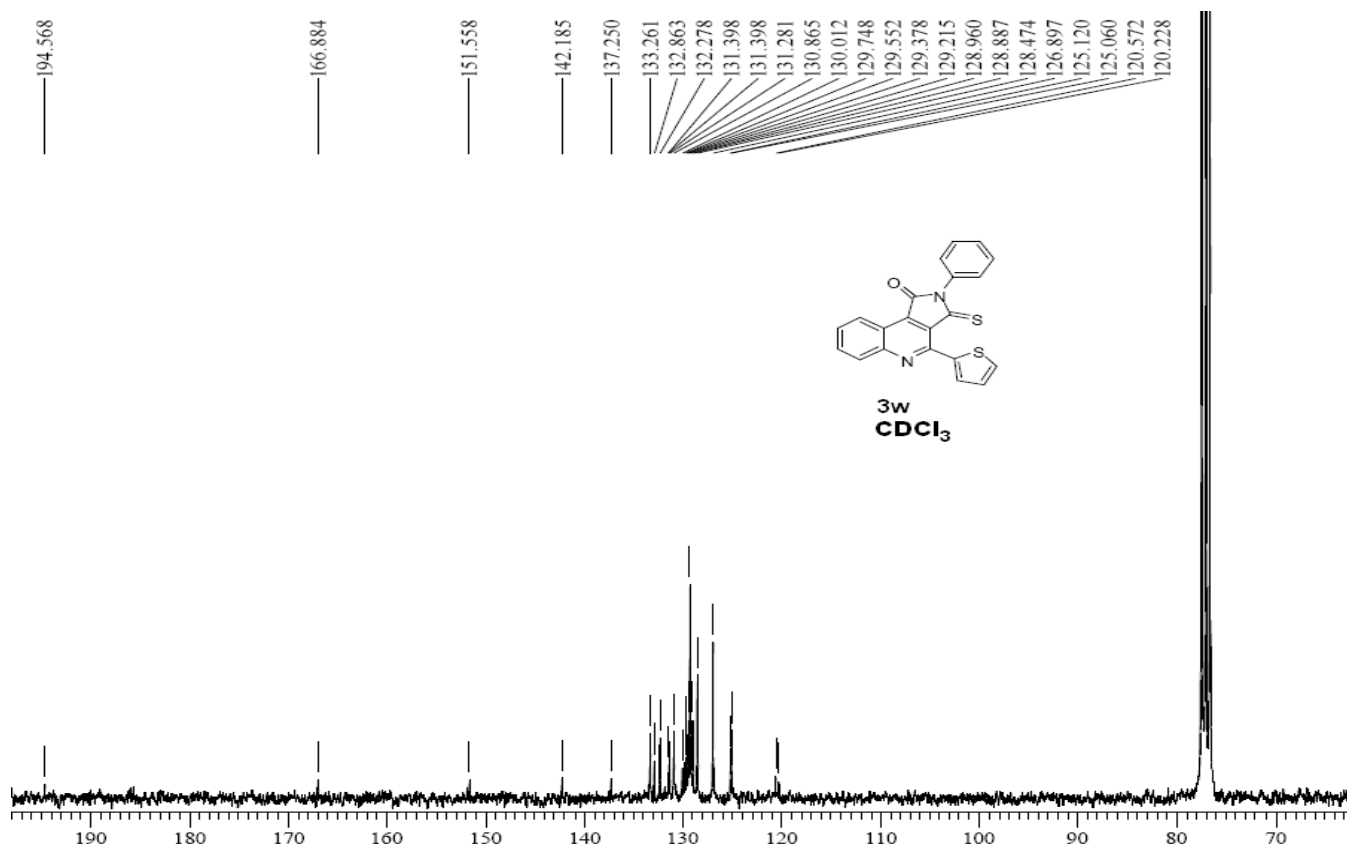

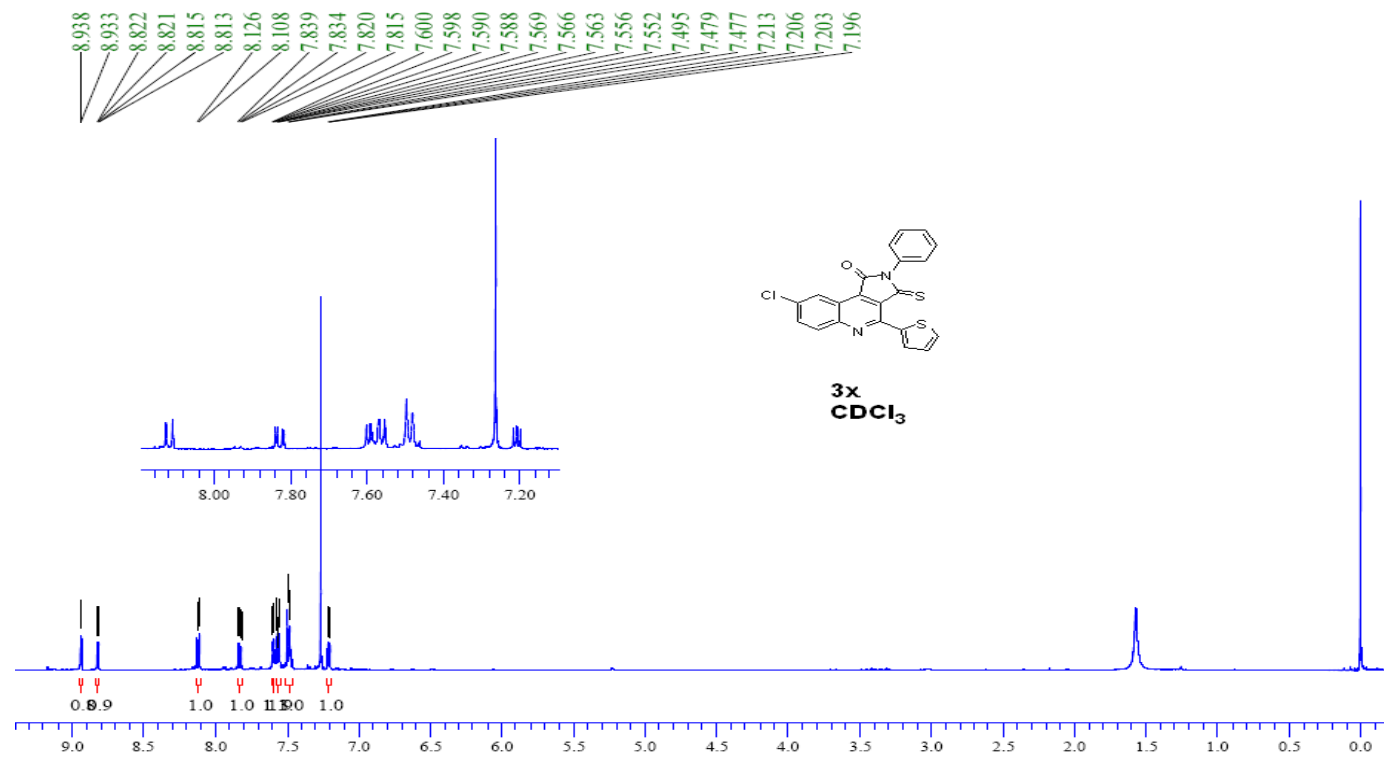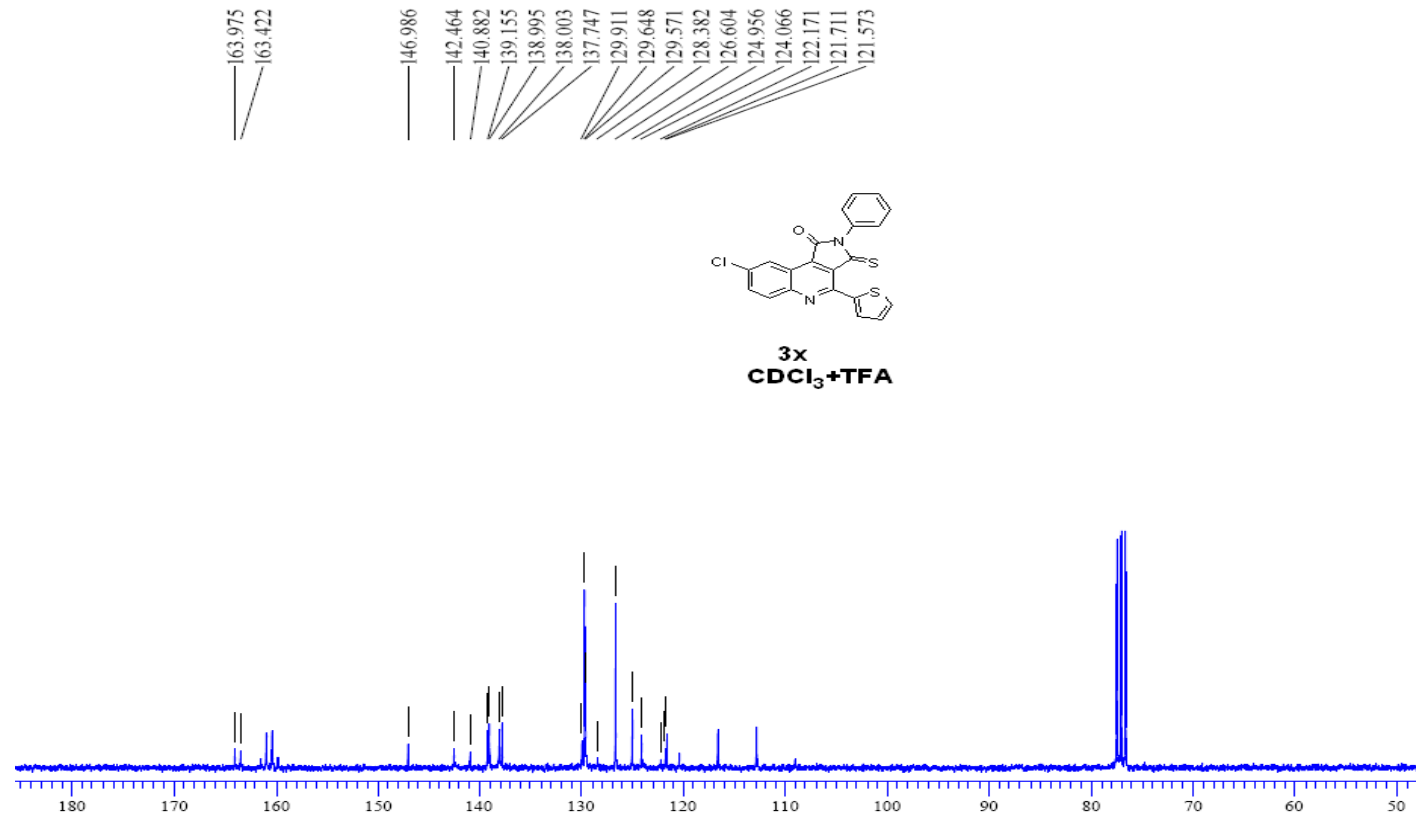

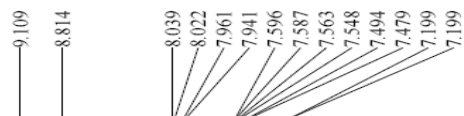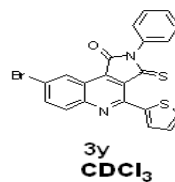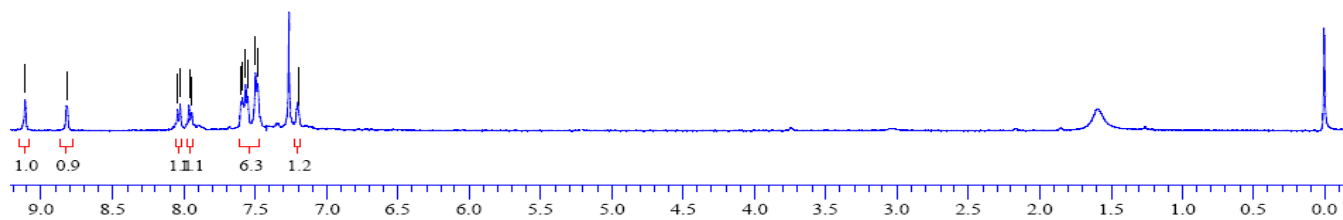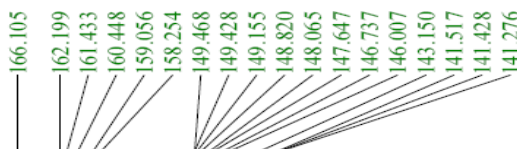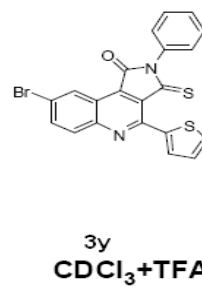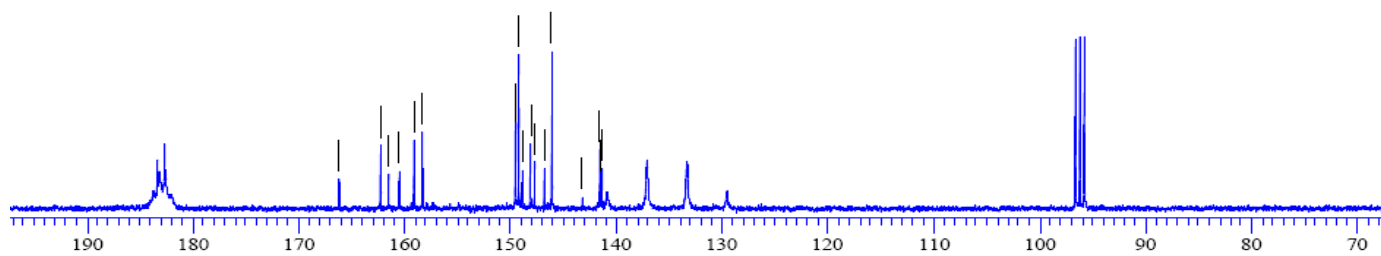

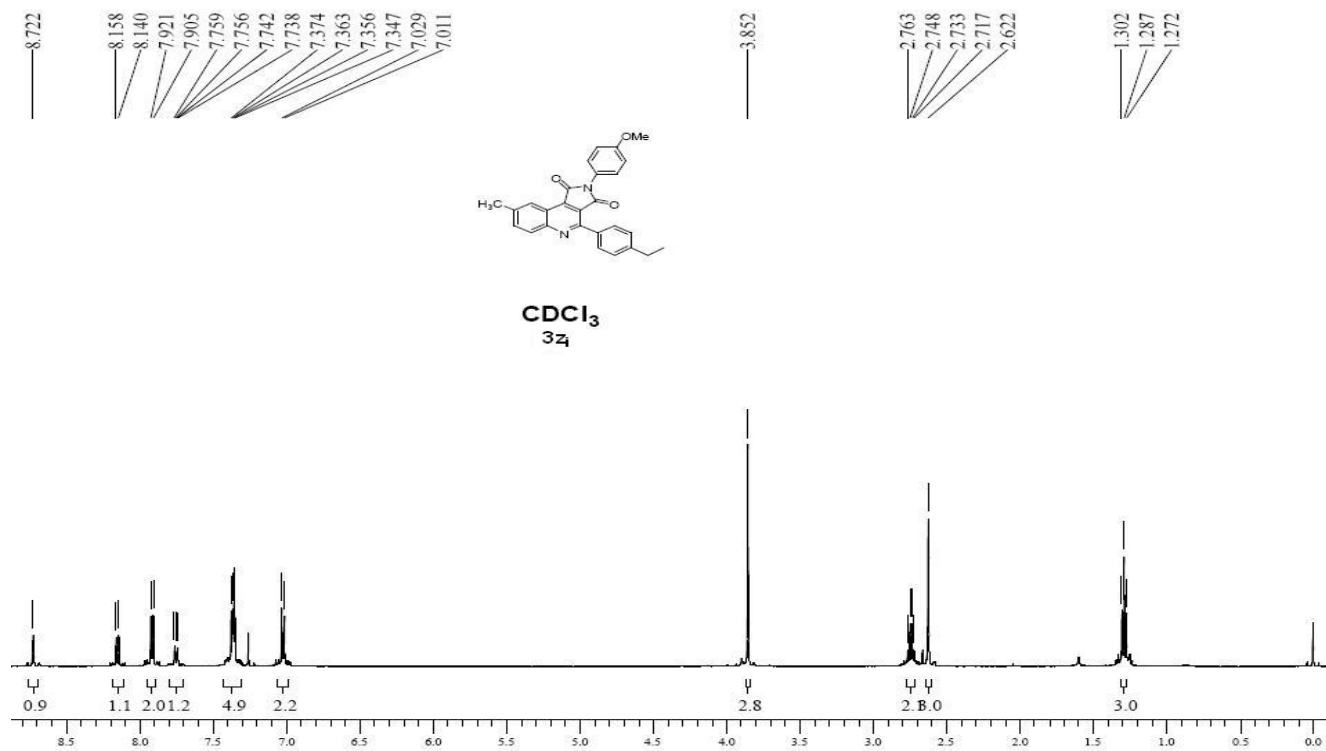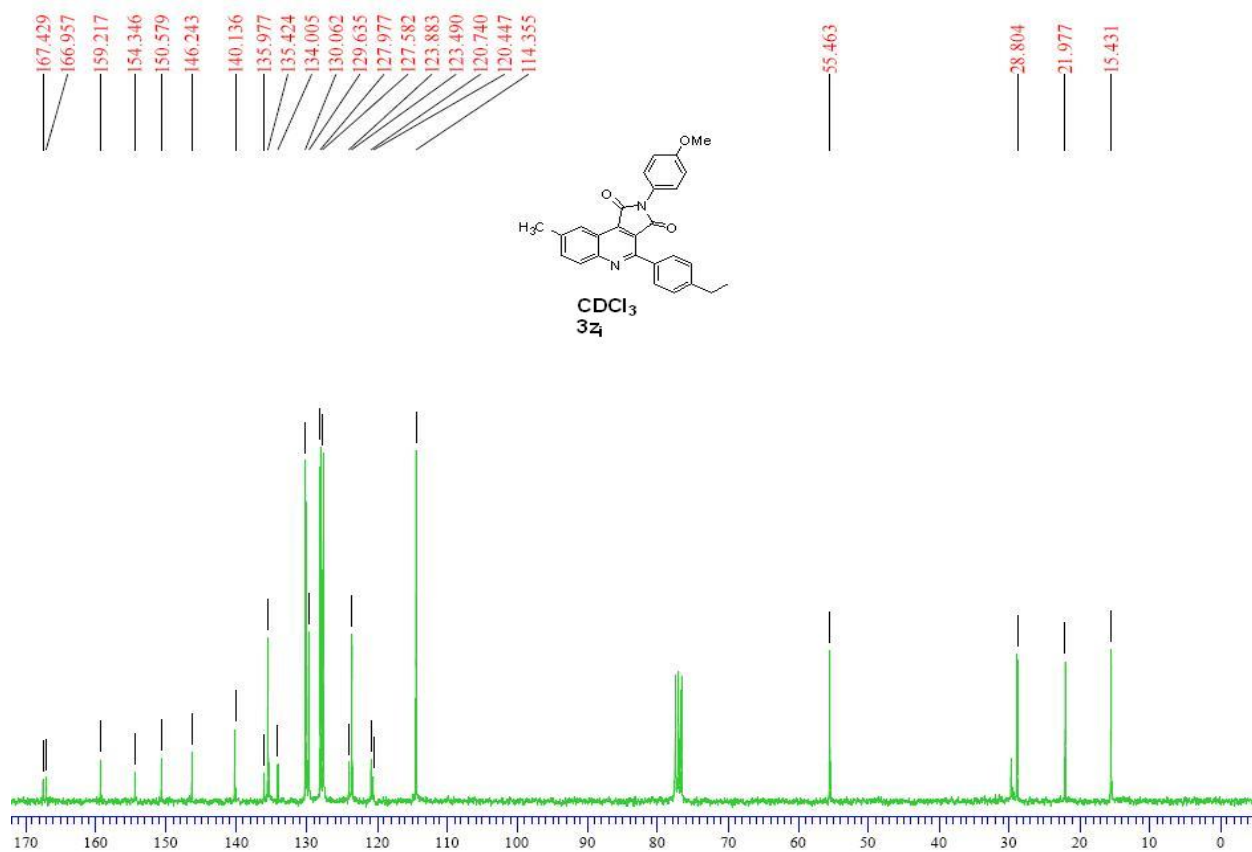

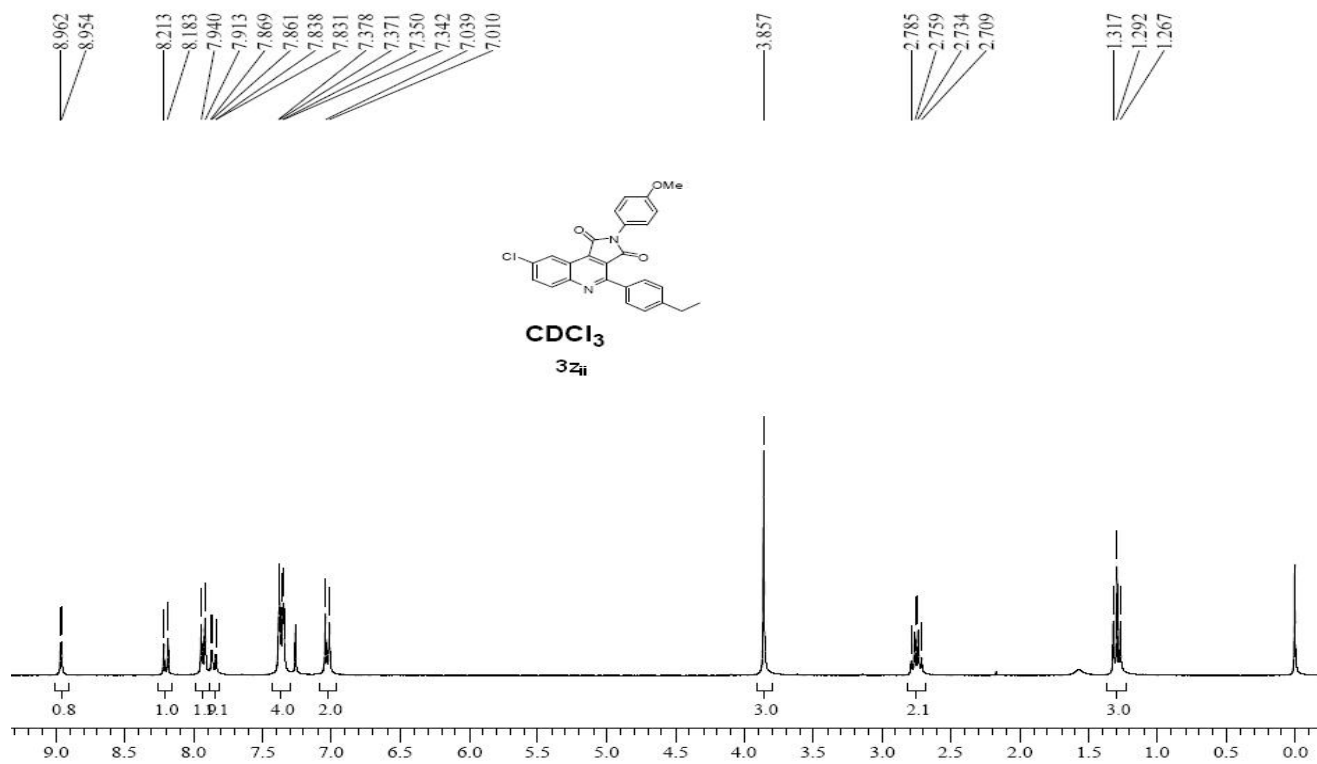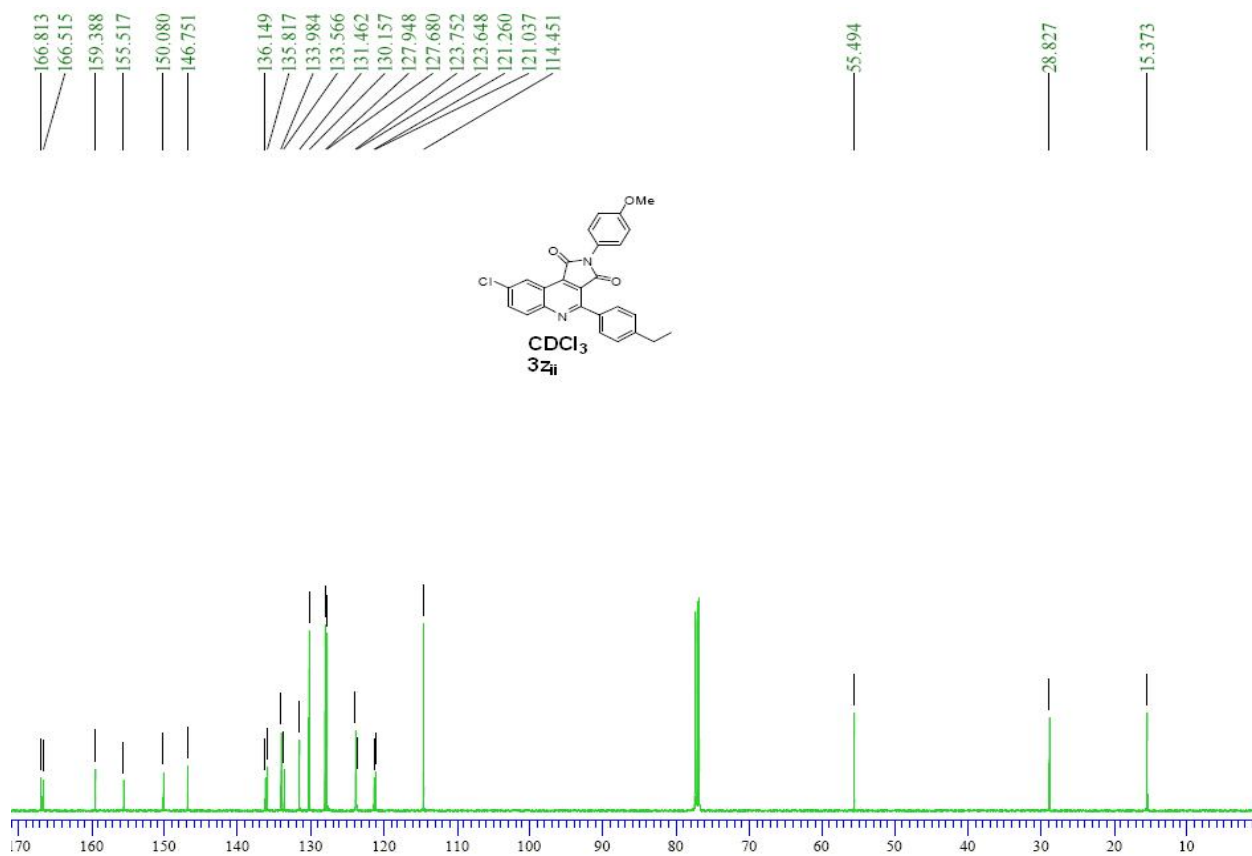

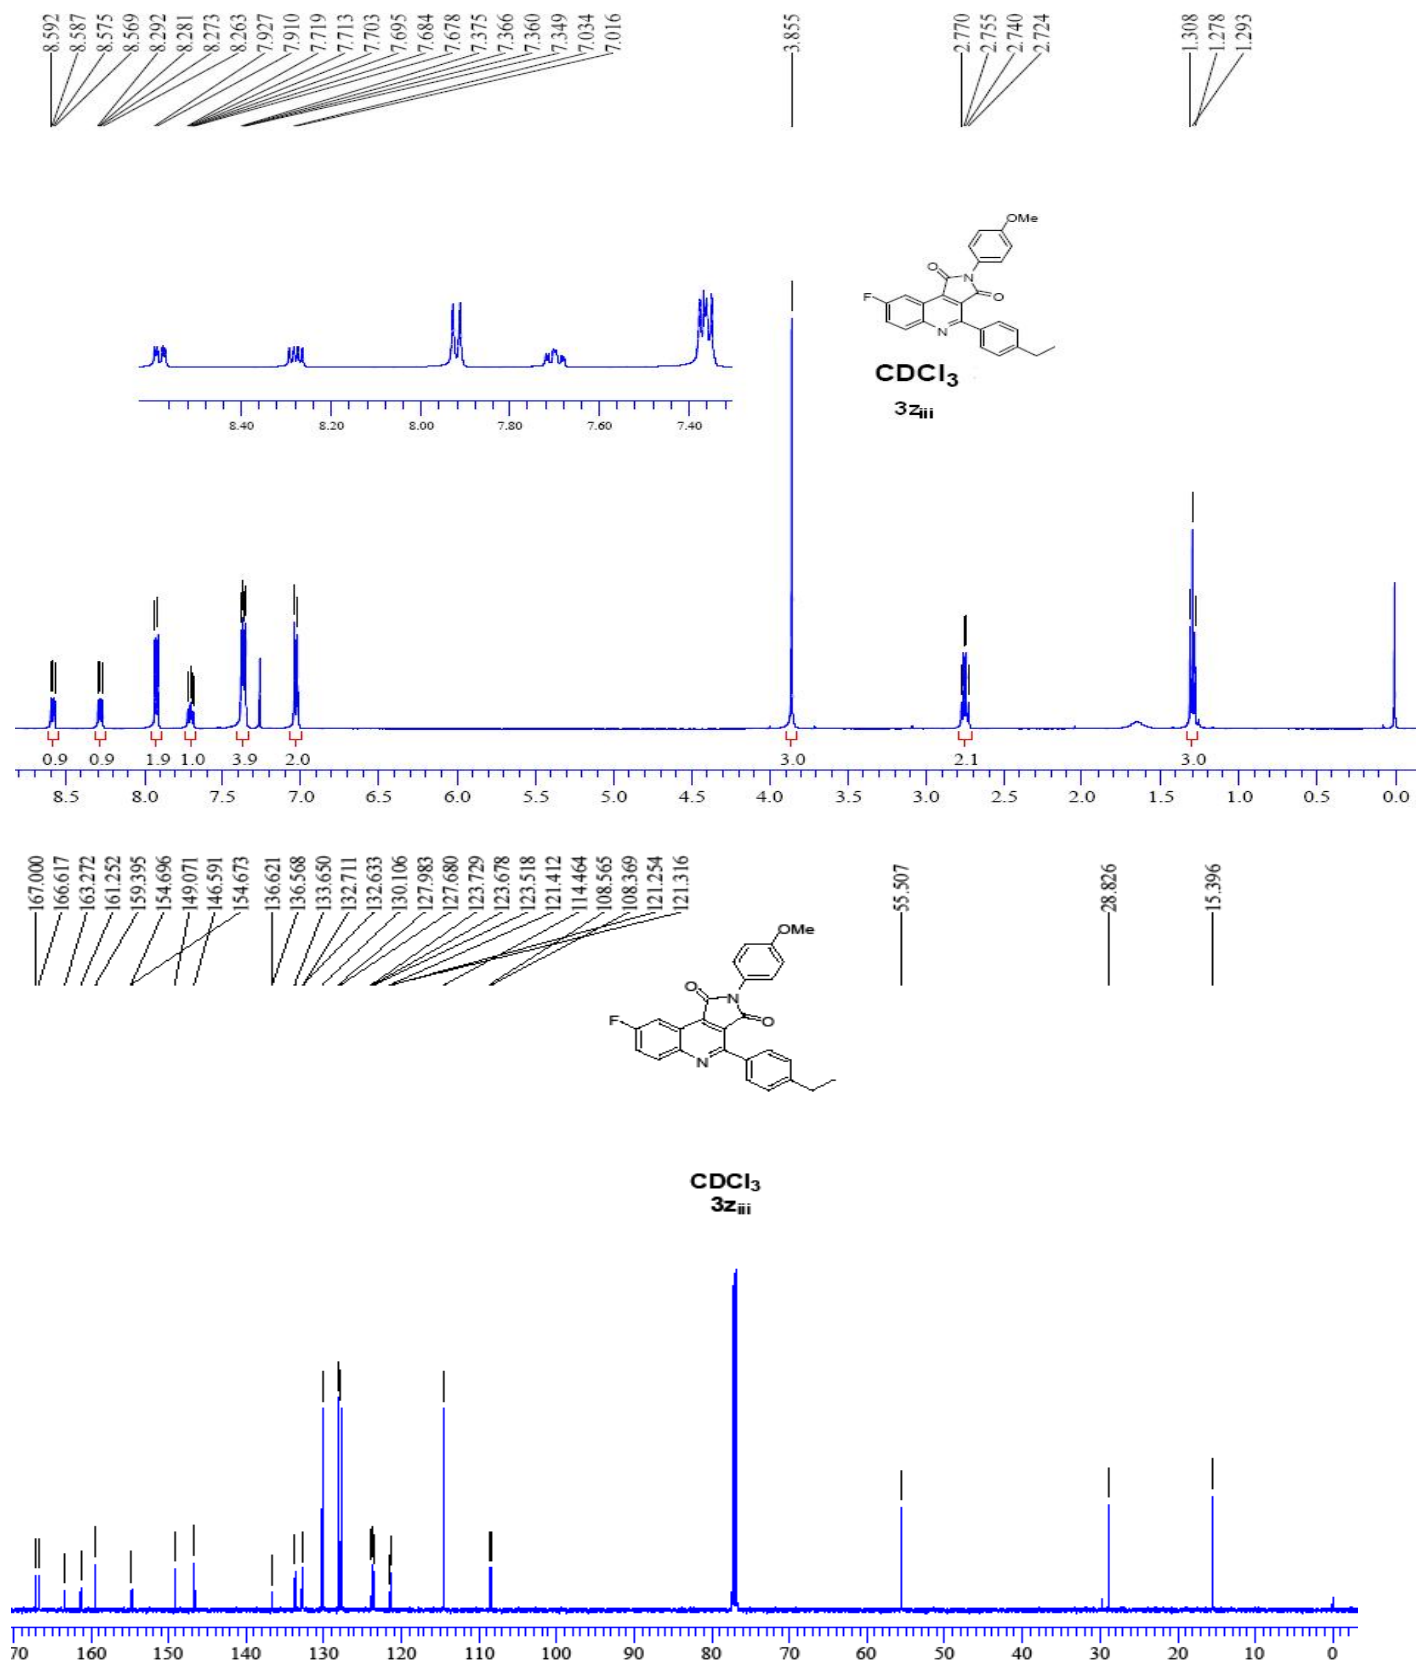



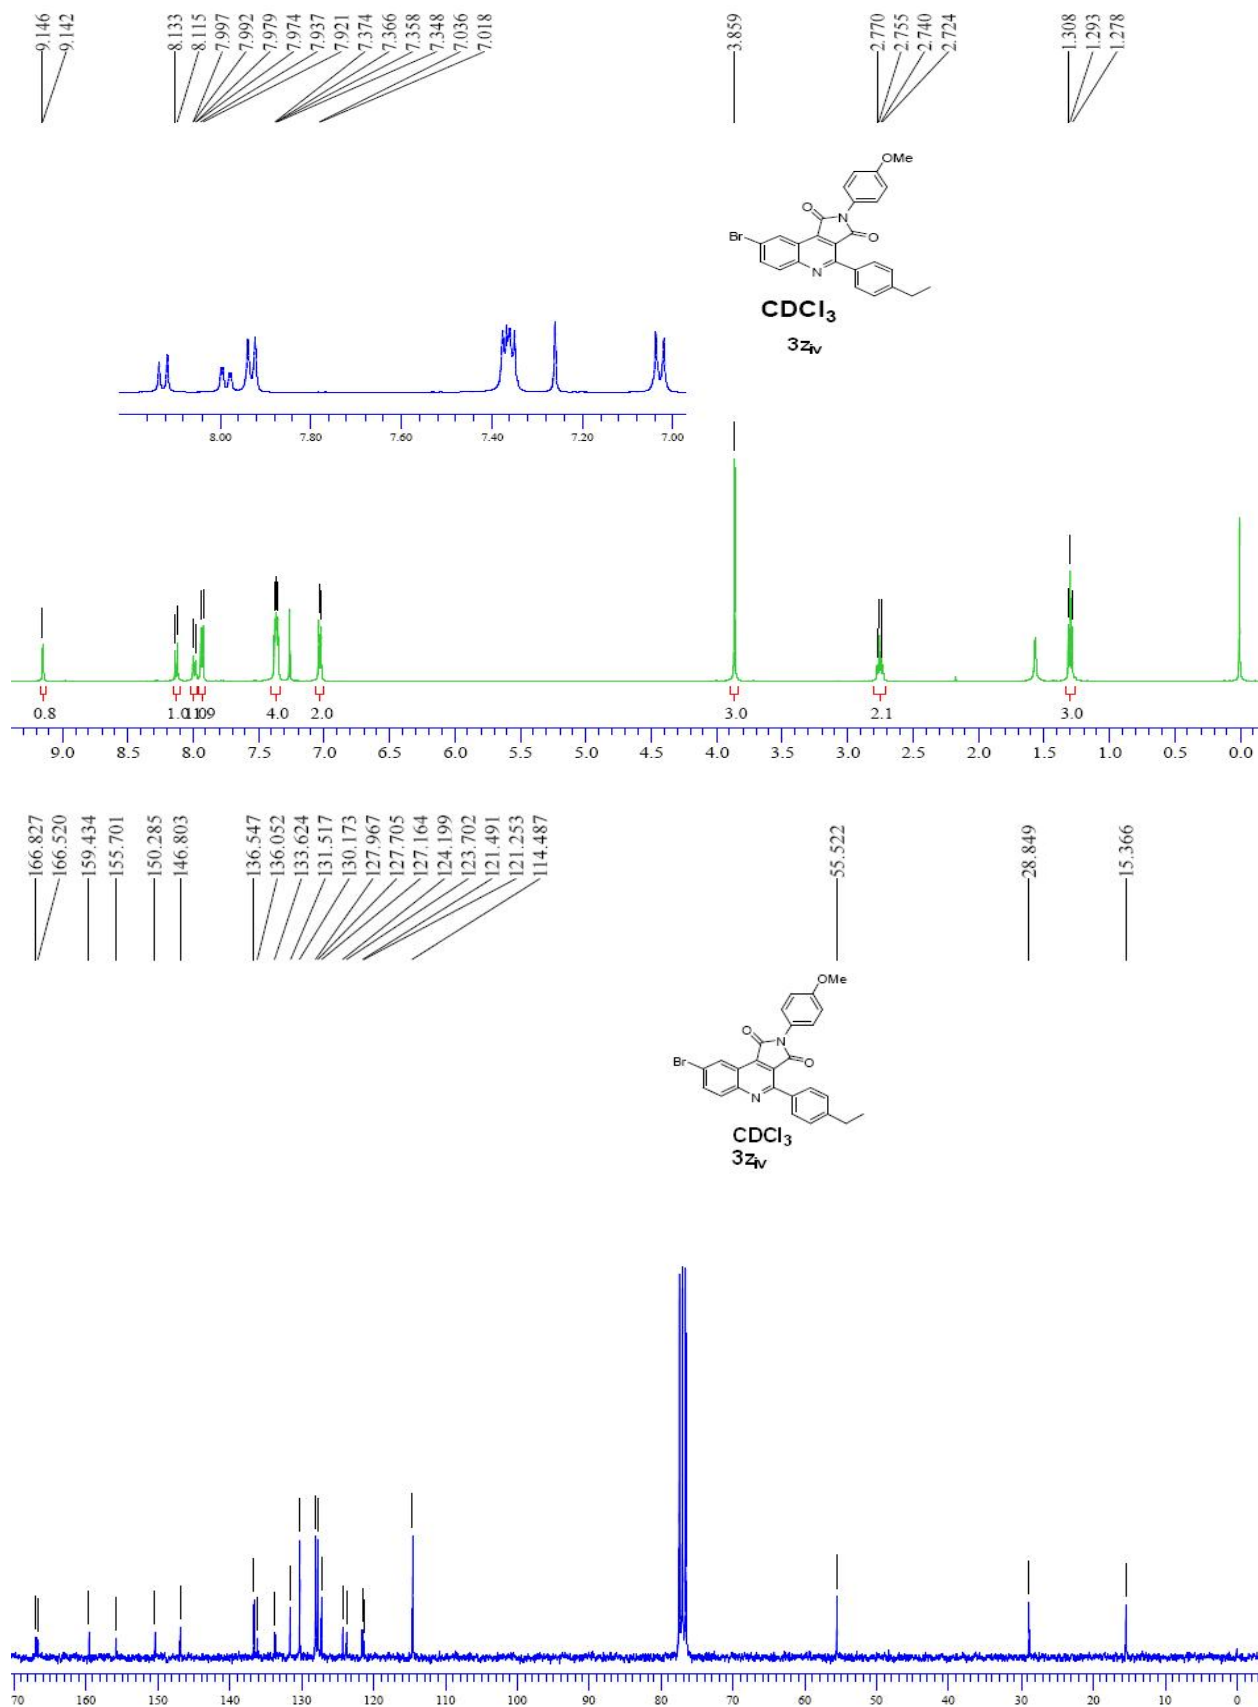

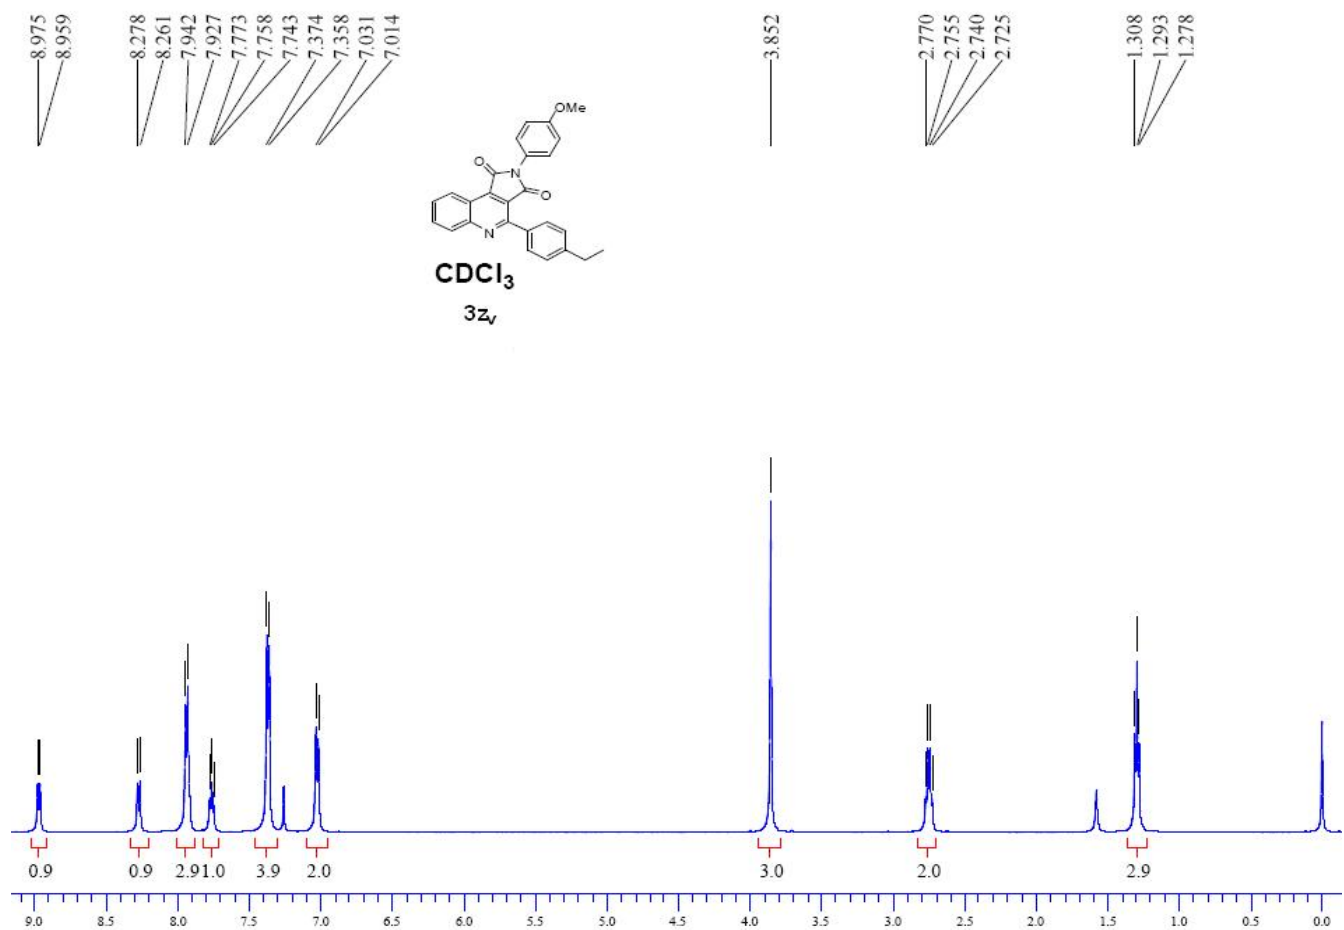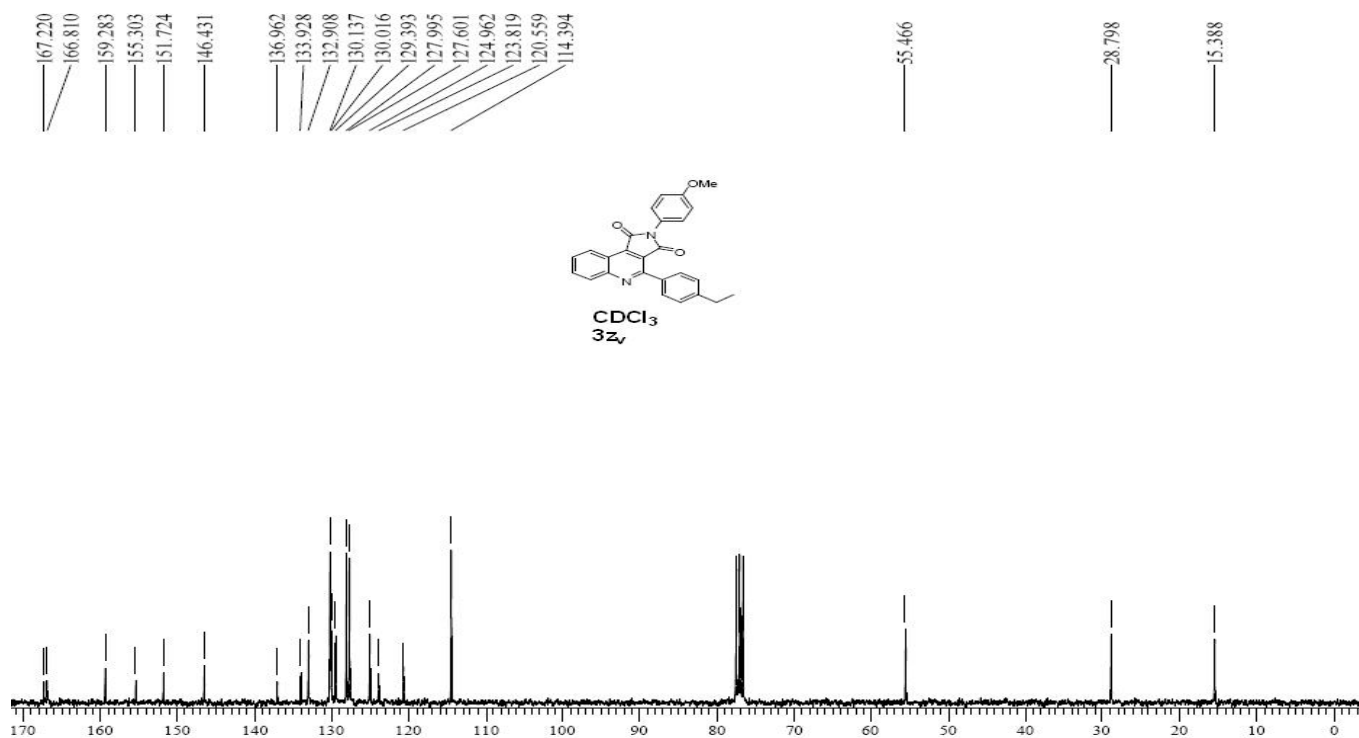

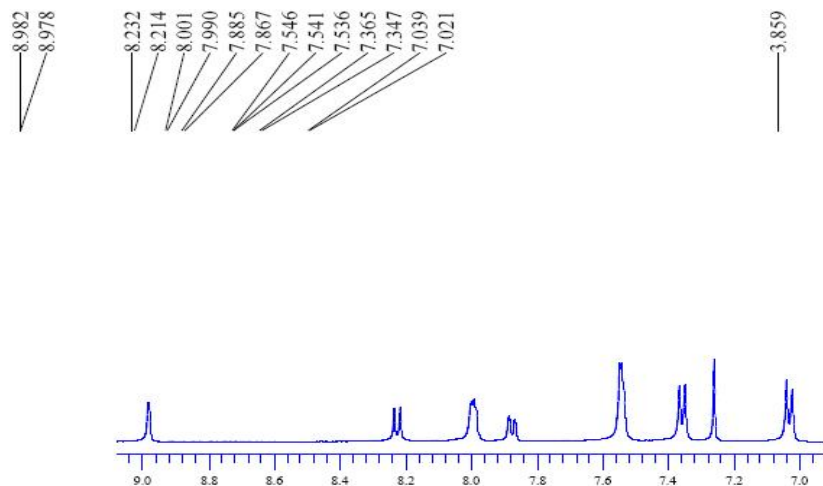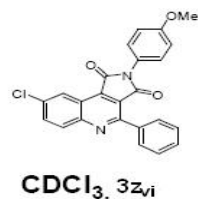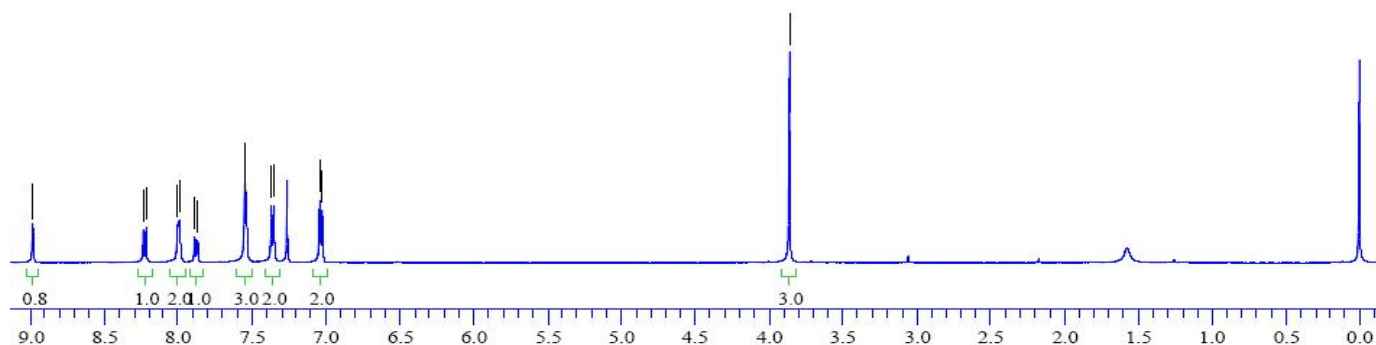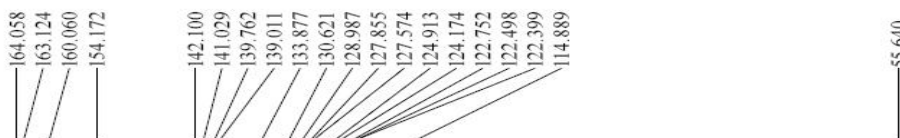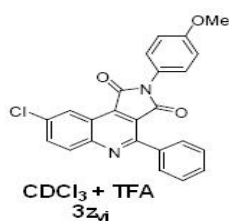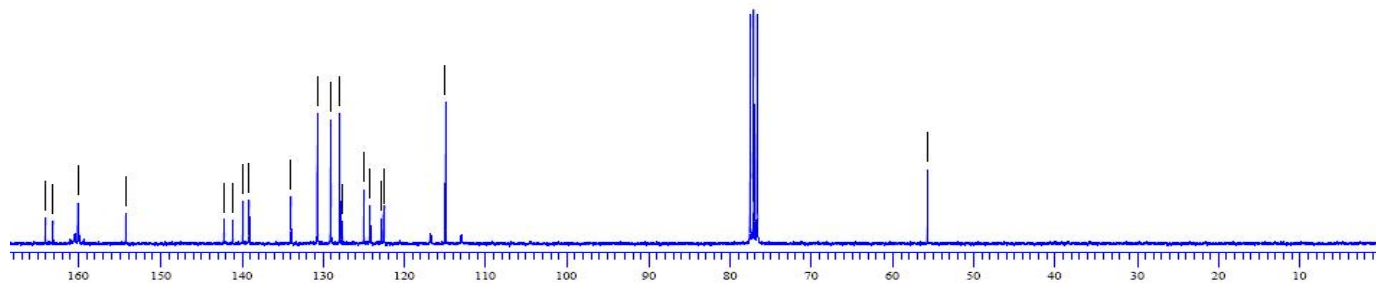

**HRMS-DATA (3a-z<sub>vi</sub>):**

A SRINIVAS  
2/6/2013 6:30:15 PM

INDIAN INSTITUTE OF CHEMICAL TECHNOLOGY  
NATIONAL CENTRE FOR MASS SPECTROMETRY

YR-QUI-1 #11 RT: 0.11 AV: 1 NL: 1.14E8  
T: FTMS (1,1) + p ESI Full ms [100.00-2000.00]

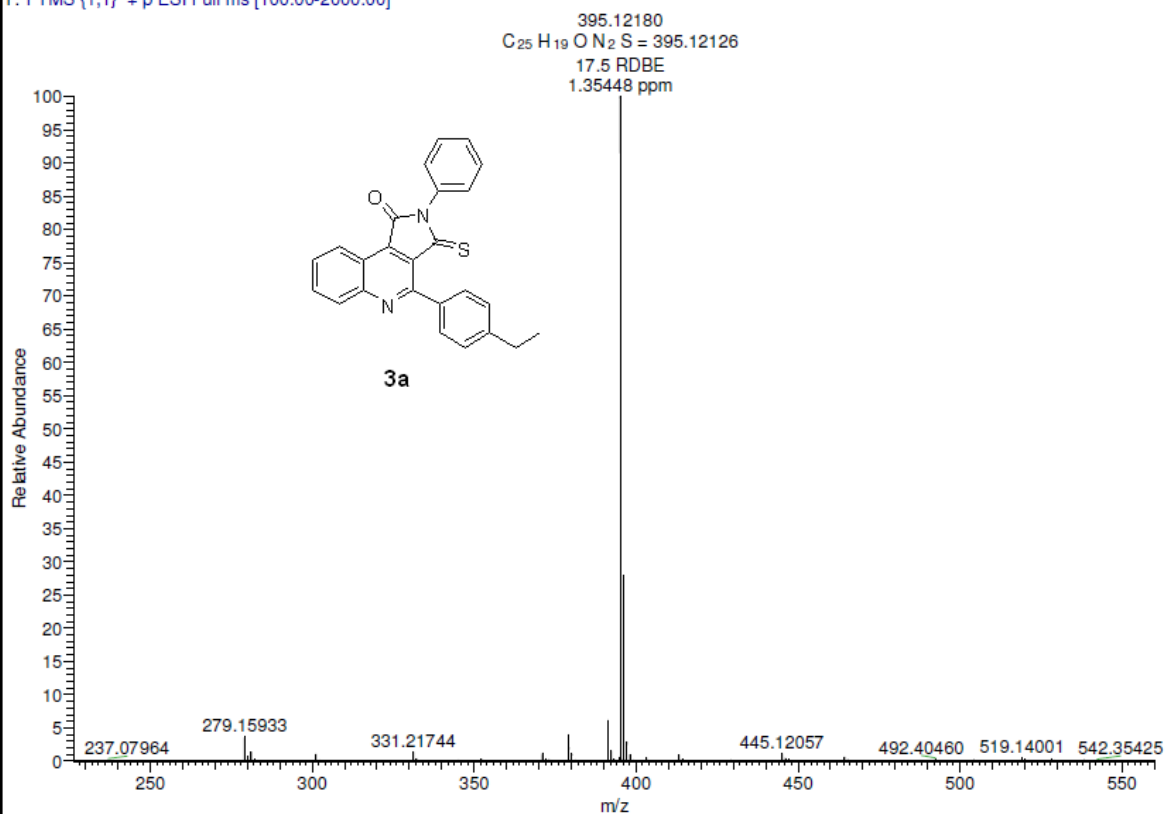

A SRINIVAS  
11/29/2012 6:24:50 PM

INDIAN INSTITUTE OF CHEMICAL TECHNOLOGY  
NATIONAL CENTRE FOR MASS SPECTROMETRY

YR-QUI-2 #13 RT: 0.13 AV: 1 NL: 4.99E6  
T: FTMS (1,1) + p ESI Full ms [125.00-2500.00]

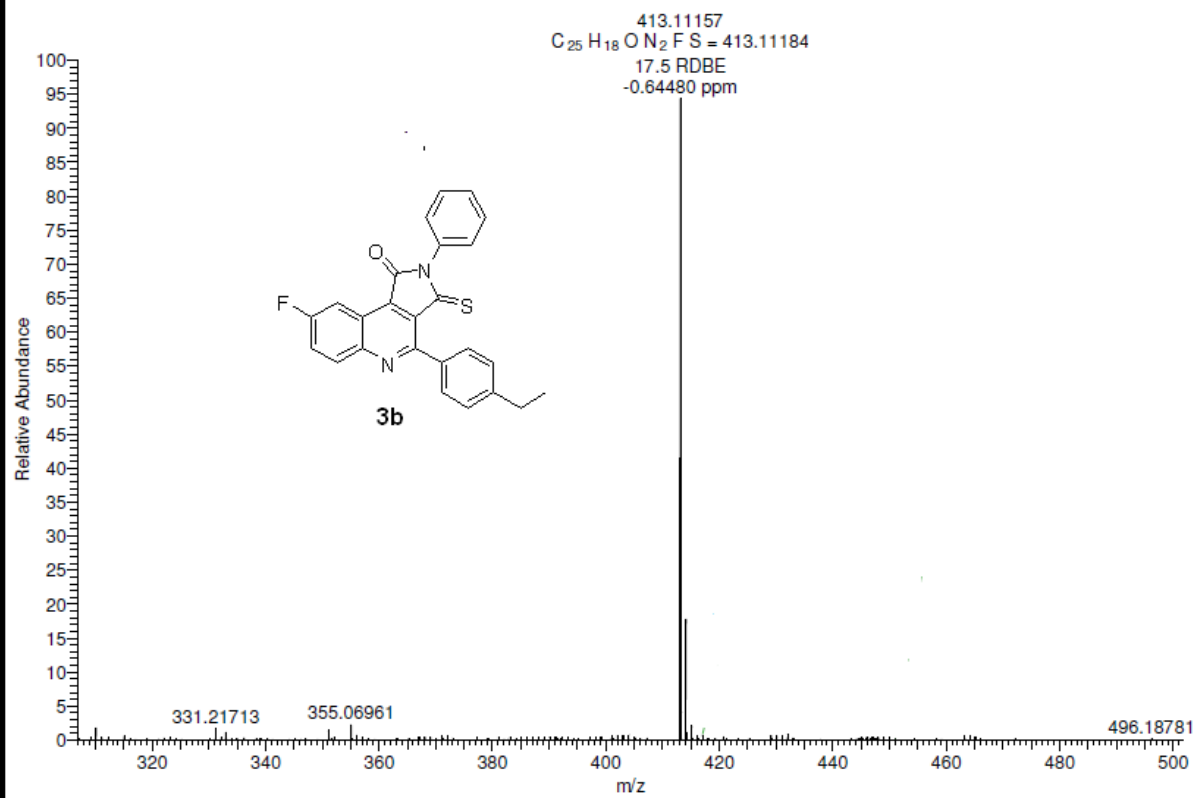

A SRINIVAS  
2/6/2013 6:14:25 PM

INDIAN INSTITUTE OF CHEMICAL TECHNOLOGY  
NATIONAL CENTRE FOR MASS SPECTROMETRY

YR-QUI-22 #11 RT: 0.11 AV: 1 NL: 3.48E7  
T: FTMS (1,1) + p ESI Full ms [100.00-2000.00]

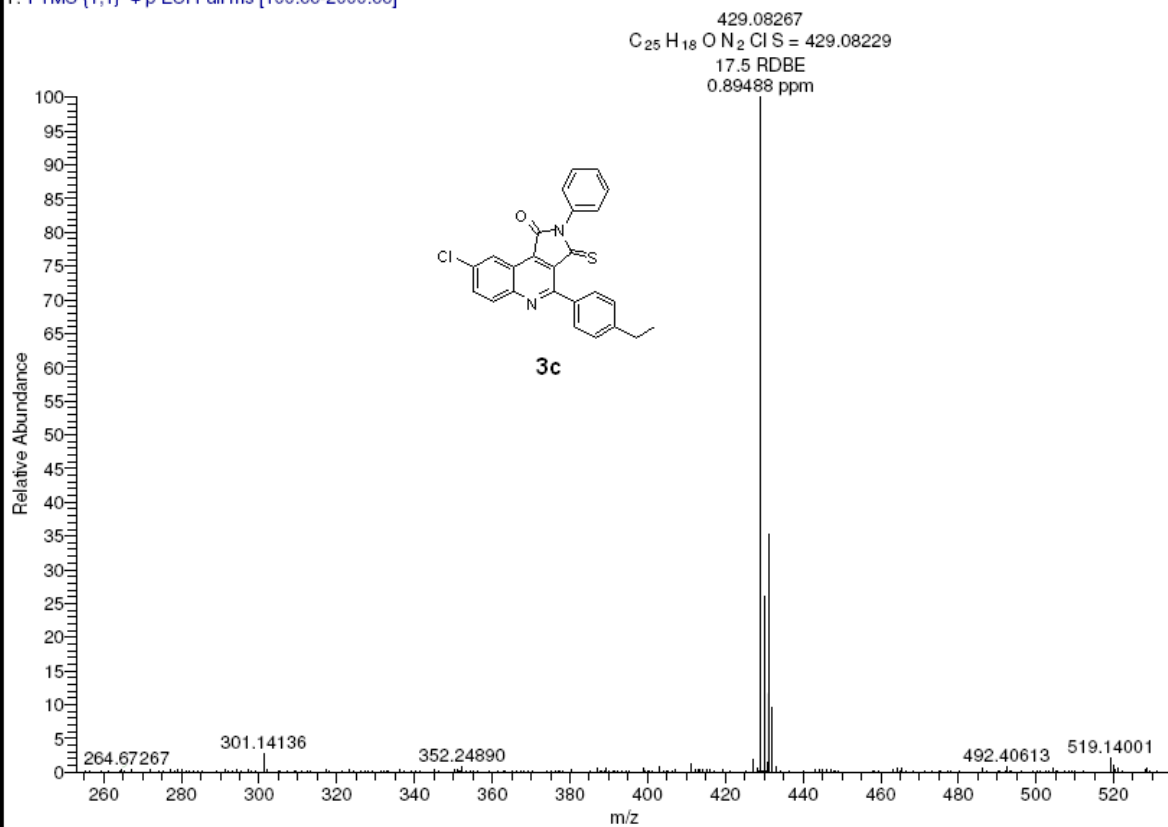

SRINIVAS  
3/7/2013 10:12:30 PM

INDIAN INSTITUTE OF CHEMICAL TECHNOLOGY  
NATIONAL CENTRE FOR MASS SPECTROMETRY

YR-QUI-3 #6-28 RT: 0.06-0.28 AV: 23 NL: 5.92E6  
T: FTMS (1,1) + p ESI Full ms [100.00-2000.00]

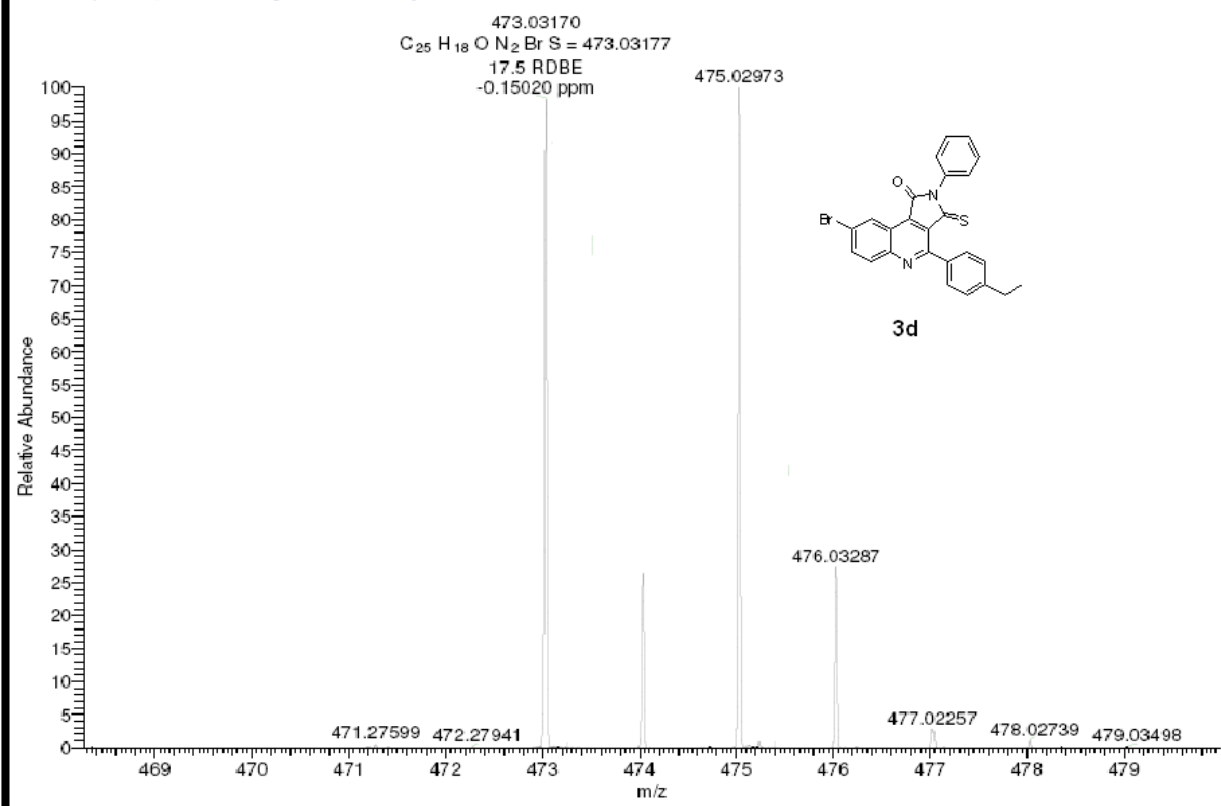



A SRINIVAS  
11/29/2012 6:19:28 PM

INDIAN INSTITUTE OF CHEMICAL TECHNOLOGY  
NATIONAL CENTRE FOR MASS SPECTROMETRY

YR-QUI-4 #12 RT: 0.12 AV: 1 NL: 2.06E7  
T: FTMS (1,1) +p ESI Full ms [125.00-2500.00]

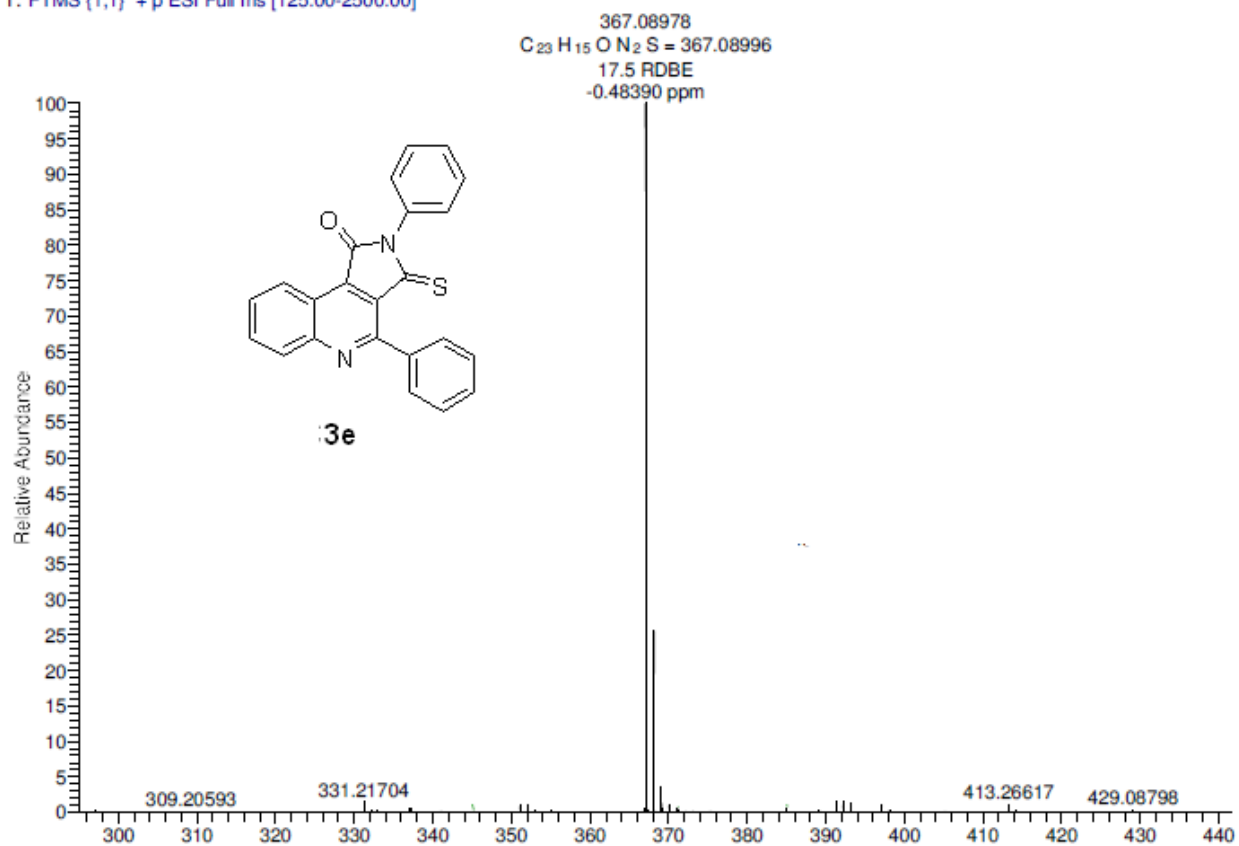

A SRINIVAS  
11/29/2012 6:16:42 PM

INDIAN INSTITUTE OF CHEMICAL TECHNOLOGY  
NATIONAL CENTRE FOR MASS SPECTROMETRY

YR-QUI-5 #12 RT: 0.12 AV: 1 NL: 7.94E6  
T: FTMS (1,1) + p ESI Full ms [125.00-2500.00]

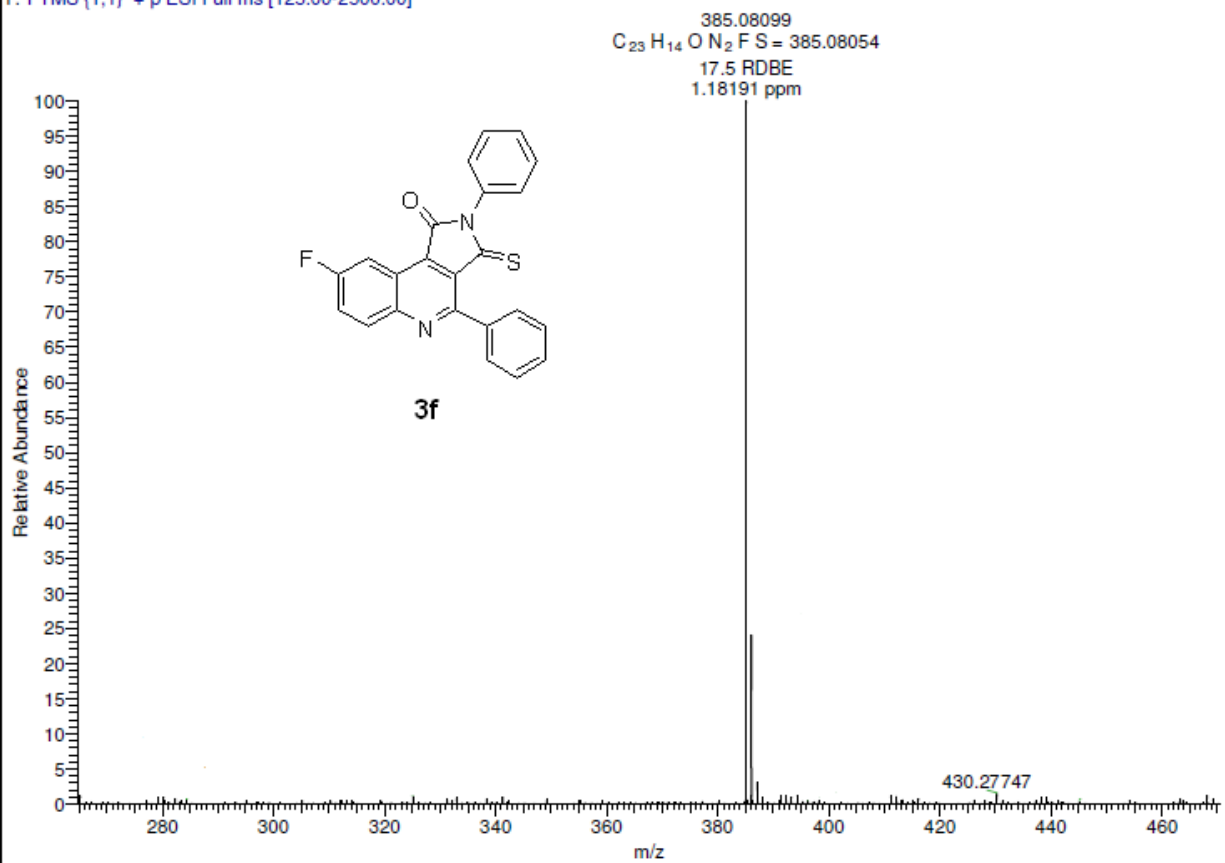

A SRINIVAS  
2/6/2013 6:27:37 PM

INDIAN INSTITUTE OF CHEMICAL TECHNOLOGY  
NATIONAL CENTRE FOR MASS SPECTROMETRY

YR-QUI-24 #11 RT: 0.11 AV: 1 NL: 3.56E7  
T: FTMS (1,1) +p ESI Full ms [100.00-2000.00]

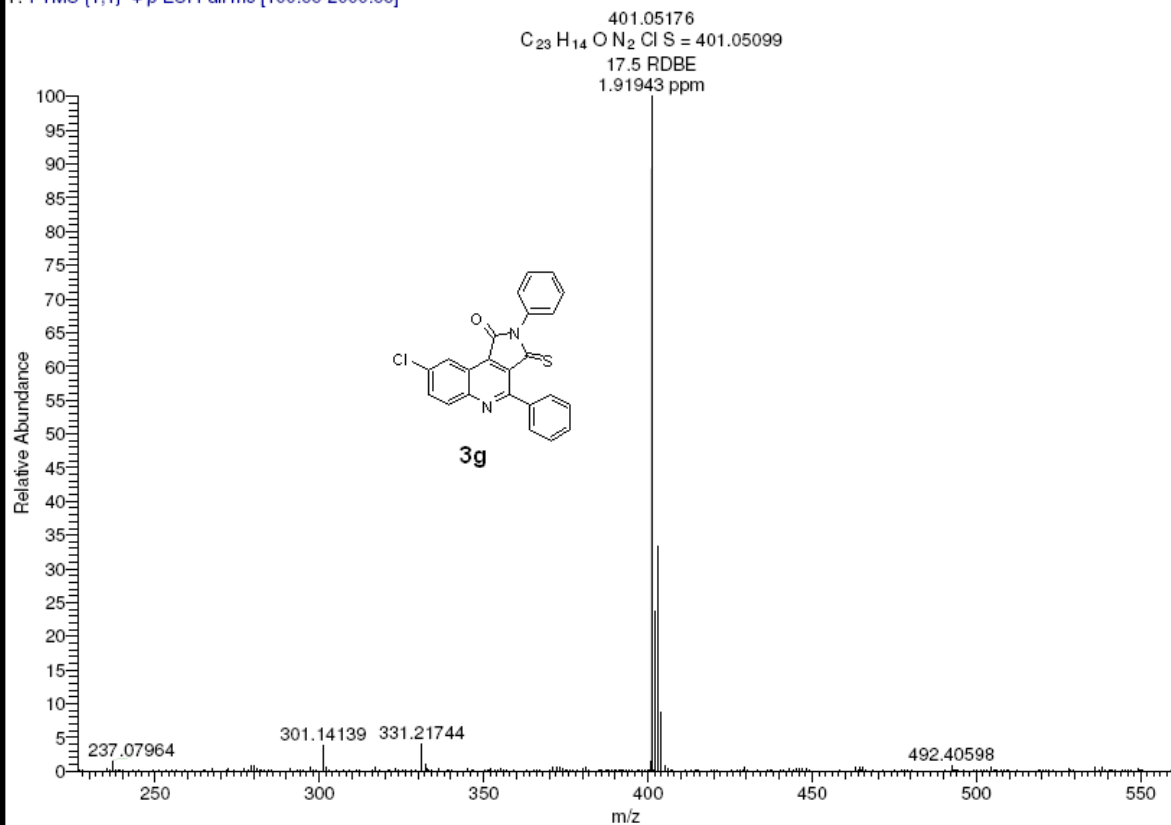

A SRINIVAS  
11/29/2012 6:14:08 PM

INDIAN INSTITUTE OF CHEMICAL TECHNOLOGY  
NATIONAL CENTRE FOR MASS SPECTROMETRY

YR-QUI-6 #12 RT: 0.12 AV: 1 NL: 6.21E6  
T: FTMS (1,1) + p ESI Full ms [125.00-2500.00]

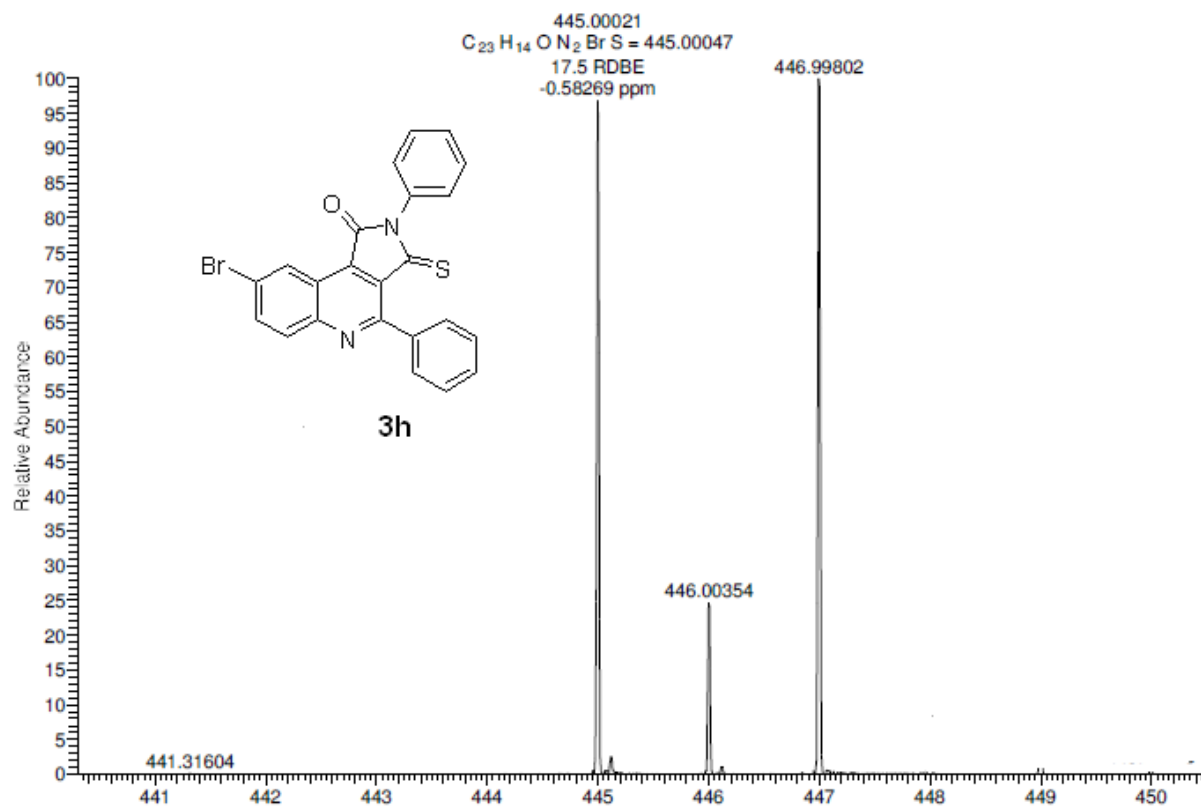

A SRINIVAS  
2/19/2013 4:47:00 PM

INDIAN INSTITUTE OF CHEMICAL TECHNOLOGY  
NATIONAL CENTRE FOR MASS SPECTROMETRY

YR-QUI-27 #63 RT: 0.22 AV: 1 NL: 6.86E6  
T: FTMS (1,1) + p ESI Full ms [100.00-2000.00]

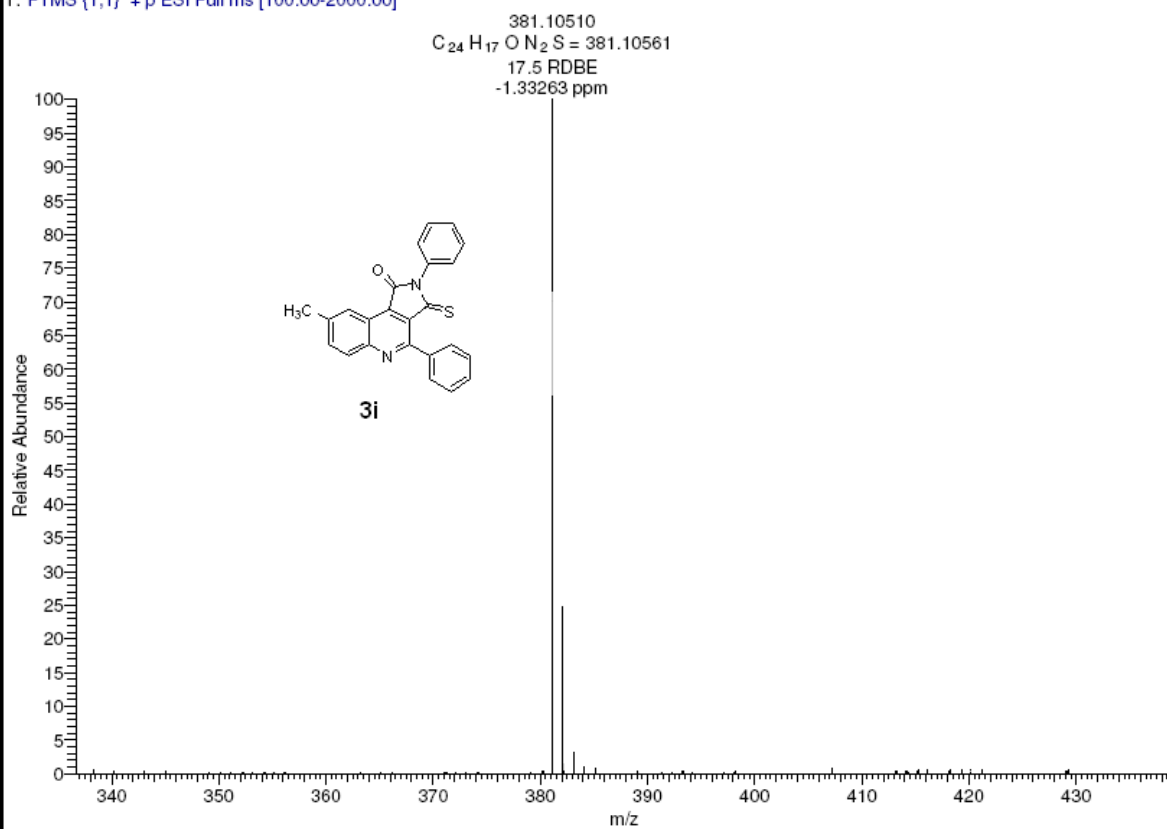

A SRINIVAS  
11/29/2012 6:11:36 PM

INDIAN INSTITUTE OF CHEMICAL TECHNOLOGY  
NATIONAL CENTRE FOR MASS SPECTROMETRY

YR-QUI-7 #12 RT: 0.12 AV: 1 NL: 8.57E6  
T: FTMS (1,1) + p ESI Full ms [125.00-2500.00]

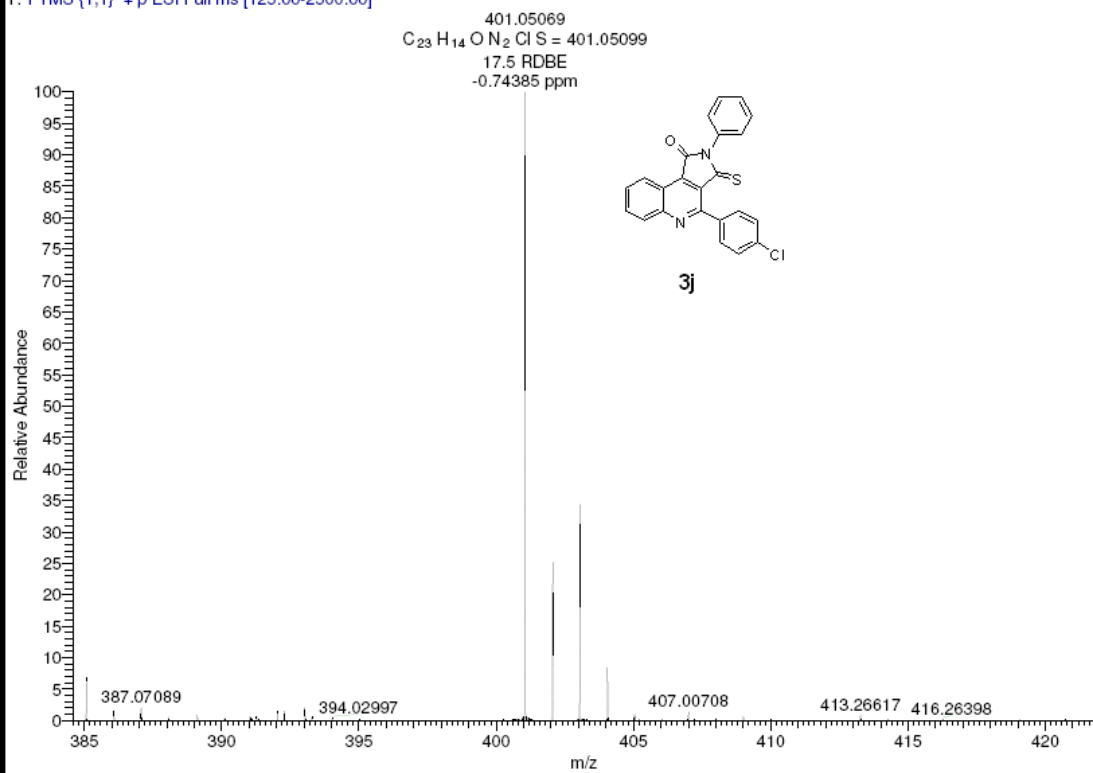

A SRINIVAS  
11/29/2012 6:09:02 PM

INDIAN INSTITUTE OF CHEMICAL TECHNOLOGY  
NATIONAL CENTRE FOR MASS SPECTROMETRY

YR-QUI-8 #13 RT: 0.13 AV: 1 NL: 1.30E6  
T: FTMS (1,1) + p ESI Full ms [125.00-2500.00]

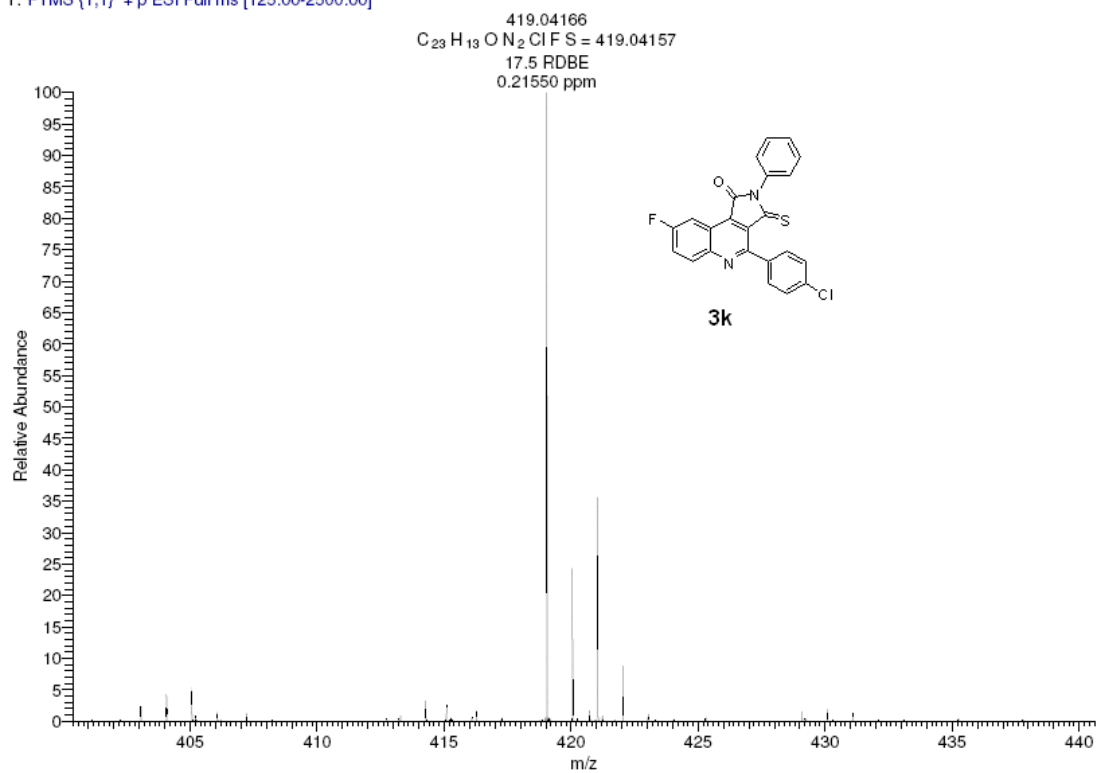

A SRINIVAS  
11/29/2012 6:06:28 PM

INDIAN INSTITUTE OF CHEMICAL TECHNOLOGY  
NATIONAL CENTRE FOR MASS SPECTROMETRY

YR-QUI-9 #12 RT: 0.12 AV: 1 NL: 6.11E4  
T: FTMS [1,1] + p ESI Full ms [125.00-2500.00]

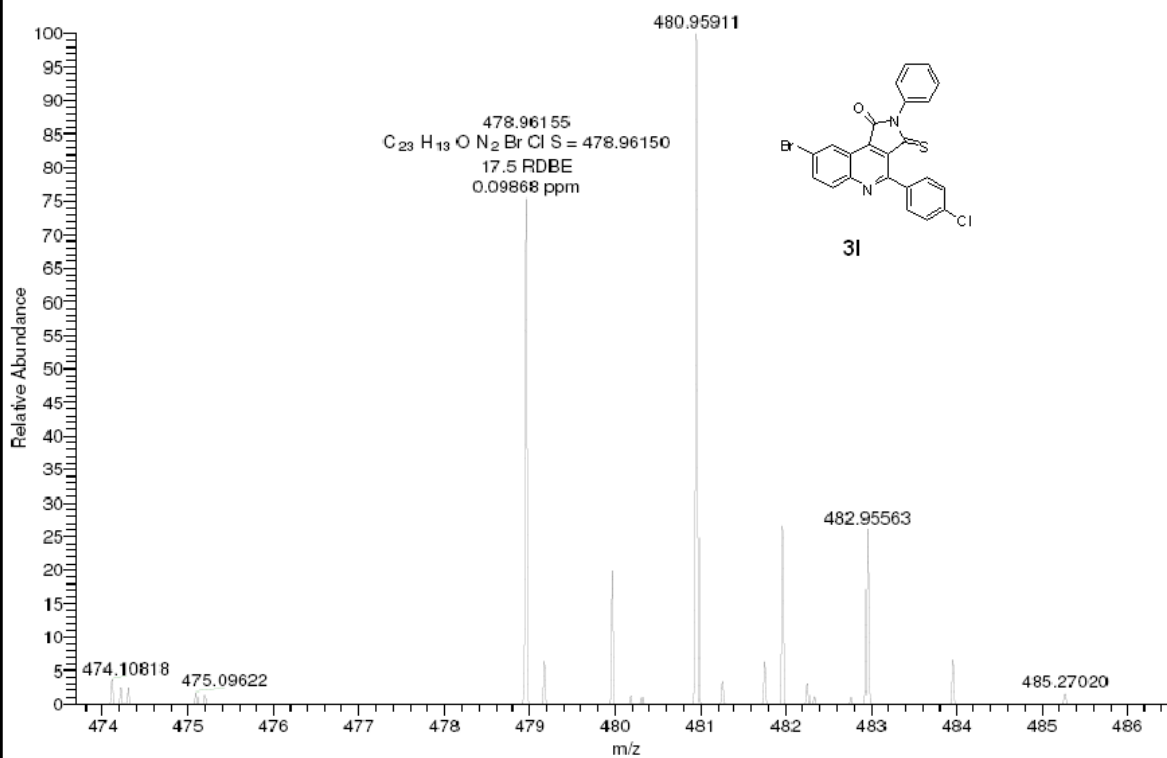



SRINIVAS  
3/7/2013 10:22:44 PM

INDIAN INSTITUTE OF CHEMICAL TECHNOLOGY  
NATIONAL CENTRE FOR MASS SPECTROMETRY

YR-QUI-28 #11 RT: 0.11 AV: 1 NL: 9.24E6  
T: FTMS (1,1) + p ESI Full ms [100.00-2000.00]

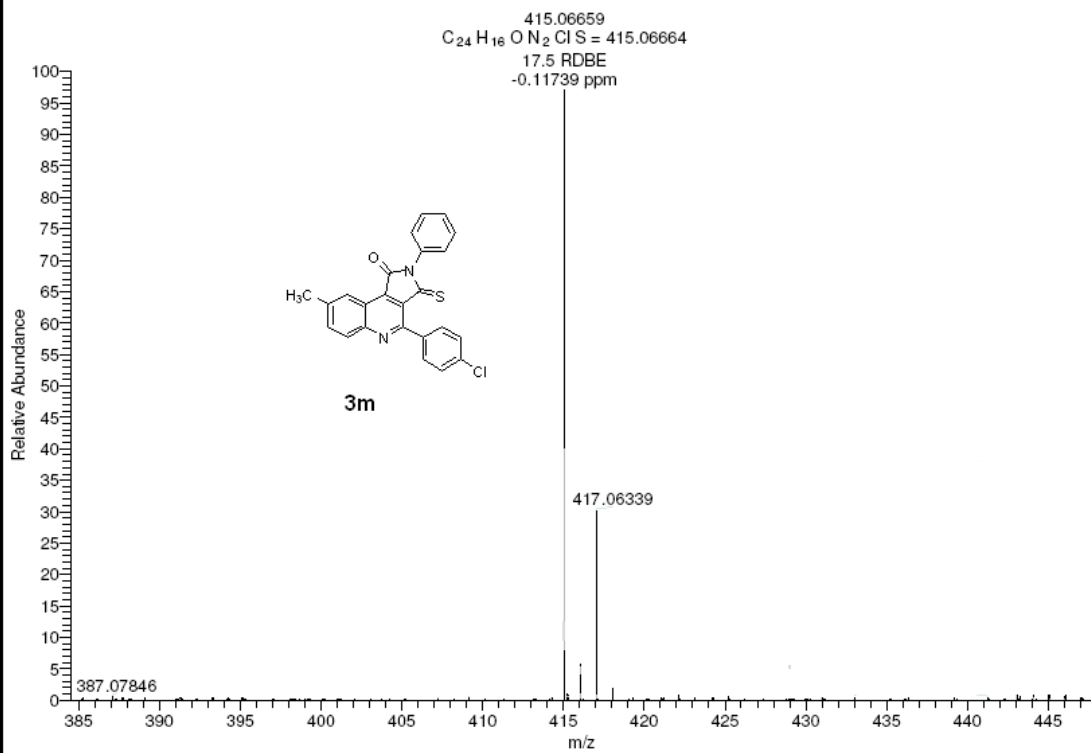

A SRINIVAS  
2/6/2013 6:24:59 PM

INDIAN INSTITUTE OF CHEMICAL TECHNOLOGY  
NATIONAL CENTRE FOR MASS SPECTROMETRY

YR-QUI-12 #11 RT: 0.11 AV: 1 NL: 7.86E7  
T: FTMS (1,1) + p ESI Full ms [100.00-2000.00]

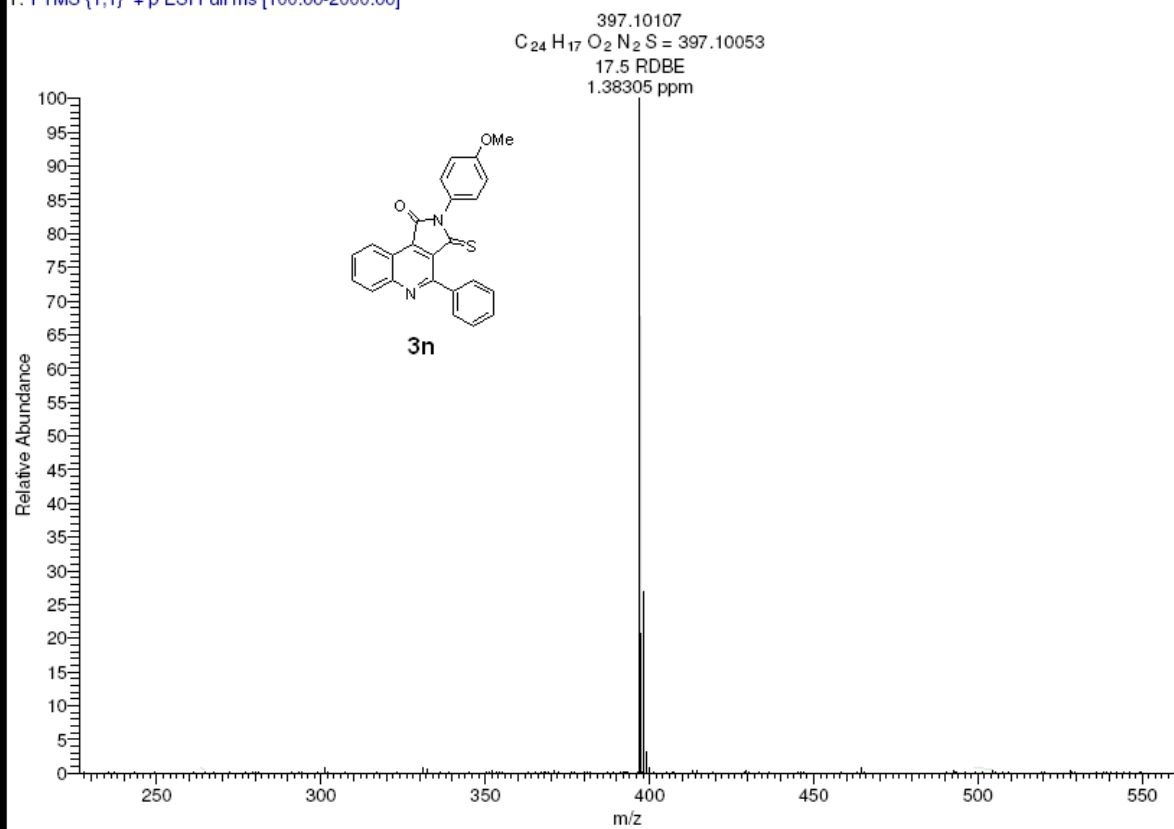

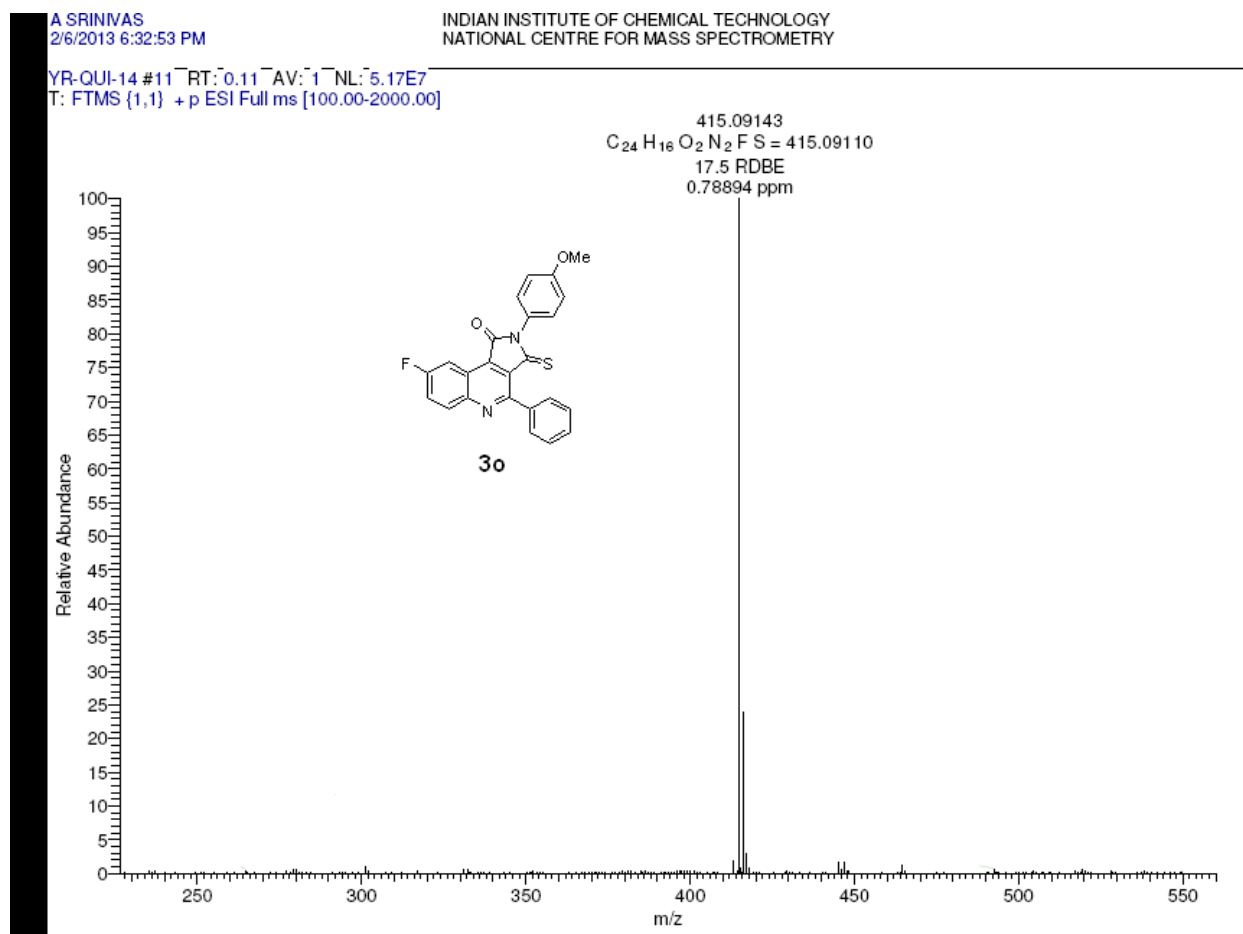

SRINIVAS  
2/22/2013 12:27:11 PM

INDIAN INSTITUTE OF CHEMICAL TECHNOLOGY  
NATIONAL CENTRE FOR MASS SPECTROMETRY

YR-QUI-25 #3-17 RT: 0.03-0.17 AV: 15 NL: 4.27E6  
T: FTMS (1,1) + p ESI Full ms [100.00-2000.00]

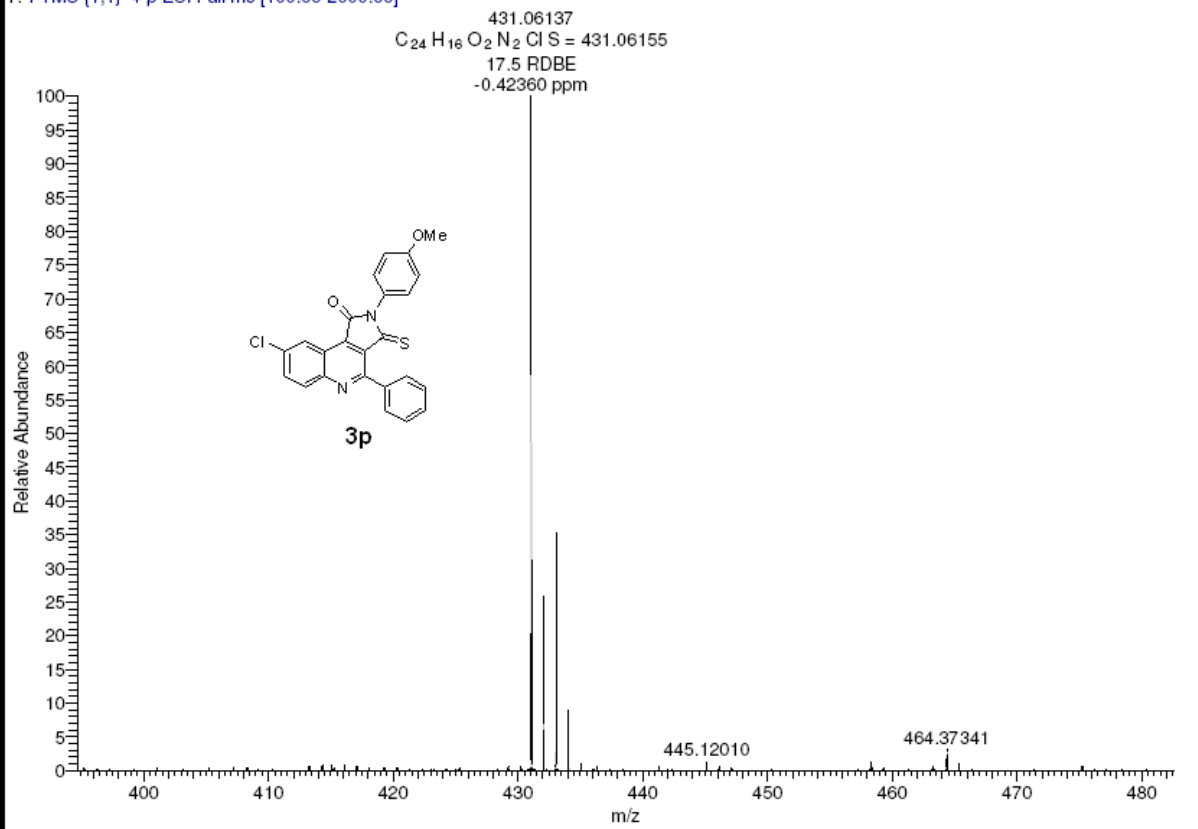

A SRINIVAS  
2/6/2013 6:19:41 PM

INDIAN INSTITUTE OF CHEMICAL TECHNOLOGY  
NATIONAL CENTRE FOR MASS SPECTROMETRY

YR-QUI-16 #11 RT: 0.11 AV: 1 NL: 7.98E7  
T: FTMS (1,1) + p ESI Full ms [100.00-2000.00]

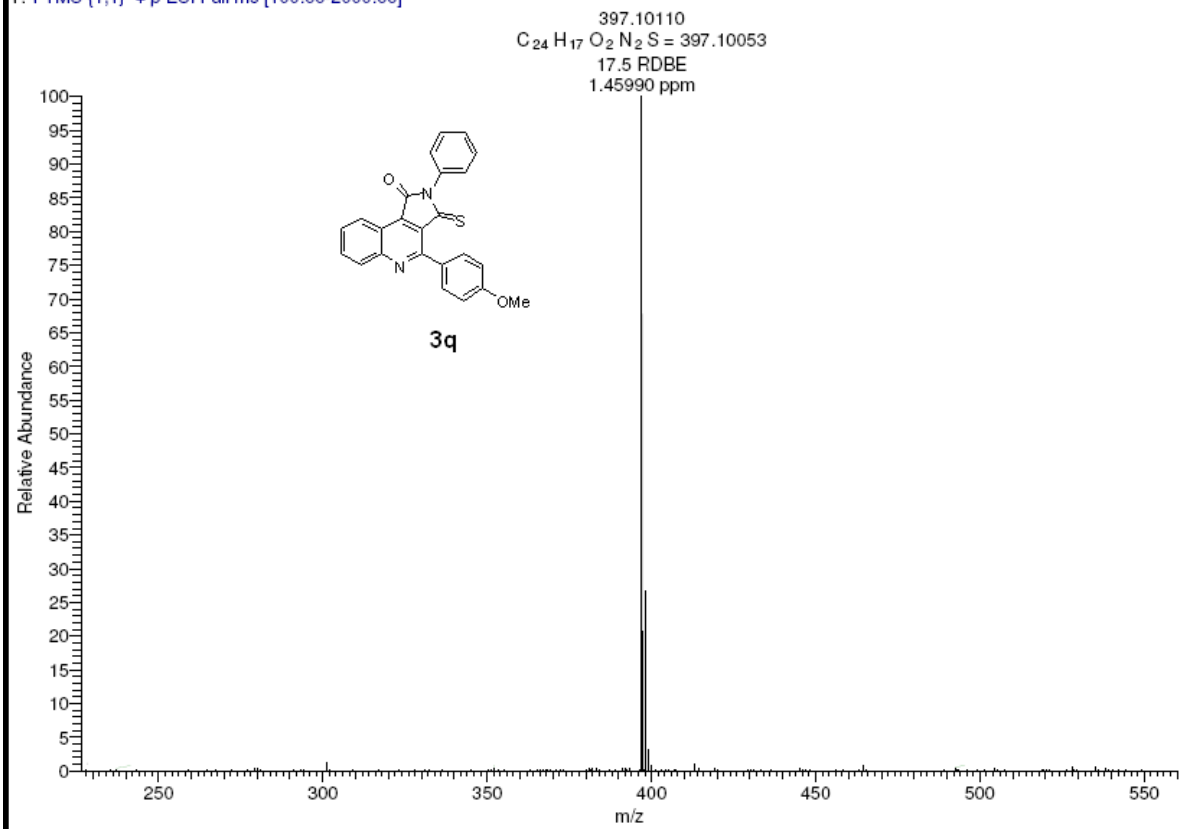

2/6/2013 6:09:07 PM

NATIONAL CENTRE FOR MASS SPECTROMETRY

YR-QUI-17 #11 RT: 0.11 AV: 1 NL: 4.65E7  
T: FTMS (1,1) + p ESI Full ms [100.00-2000.00]

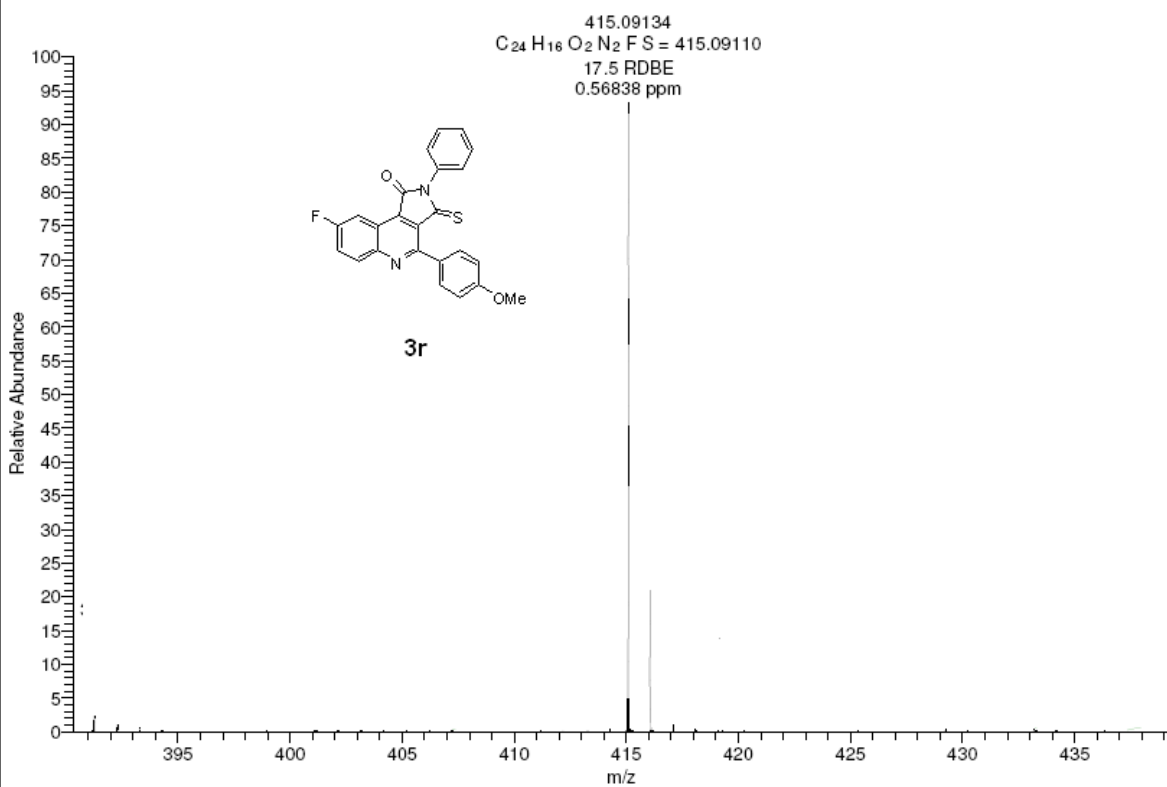

SRINIVAS  
2/22/2013 12:29:49 PM

INDIAN INSTITUTE OF CHEMICAL TECHNOLOGY  
NATIONAL CENTRE FOR MASS SPECTROMETRY

YR-QUI-29 #3-17 RT: 0.03-0.17 AV: 15 NL: 4.05E6  
T: FTMS (1,1) +p ESI Full ms [100.00-2000.00]

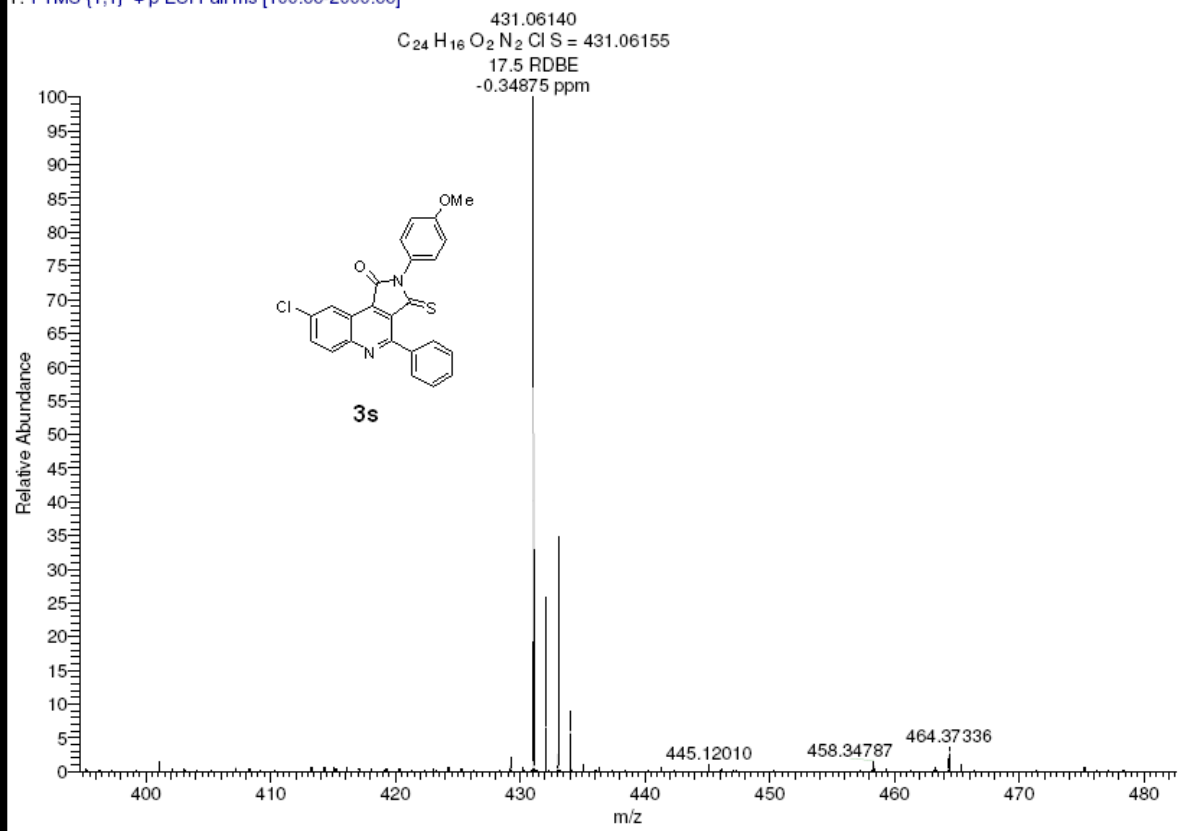

2/6/2013 6:17:03 PM

NATIONAL CENTRE FOR MASS SPECTROMETRY

YR-QUI-18 #11 RT: 0.11 AV: 1 NL: 1.09E7  
T: FTMS (1,1) + p ESI Full ms [100.00-2000.00]

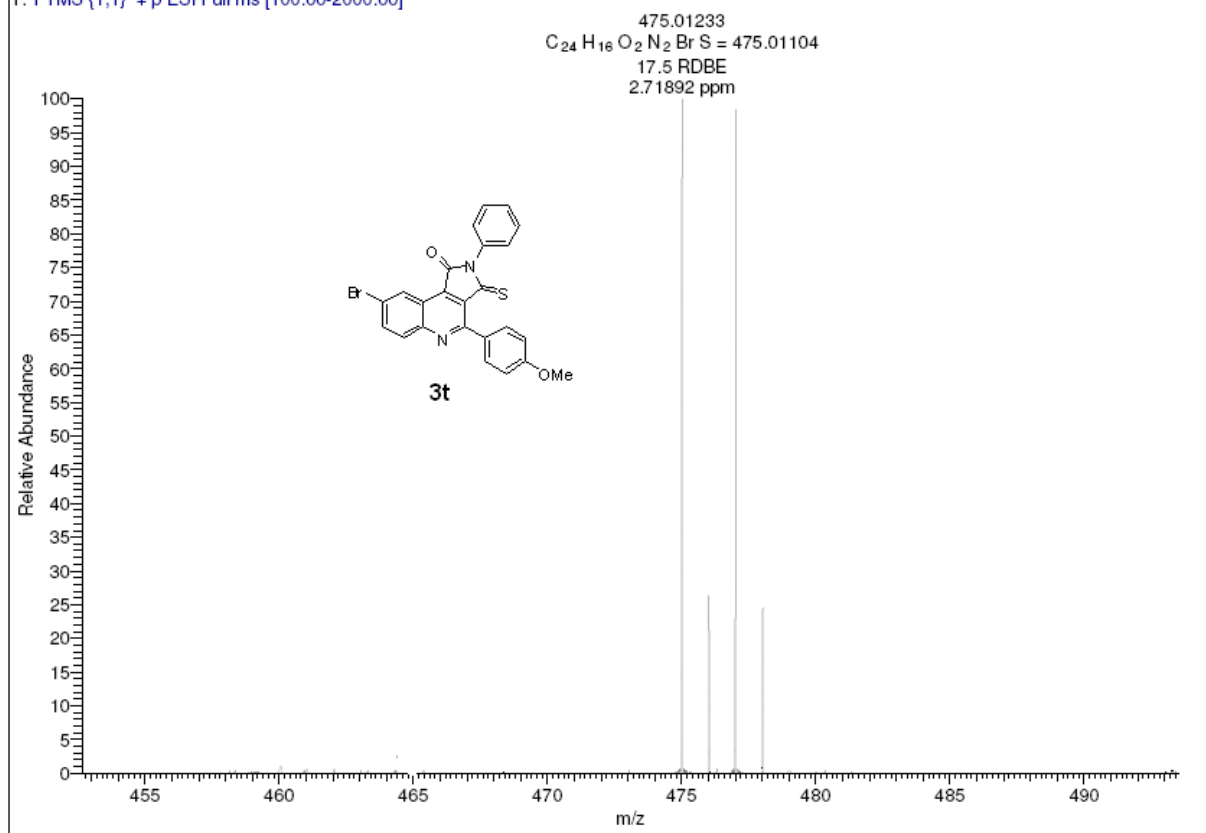



A SRINIVAS  
2/6/2013 6:22:19 PM

INDIAN INSTITUTE OF CHEMICAL TECHNOLOGY  
NATIONAL CENTRE FOR MASS SPECTROMETRY

YR-QUI-21 #11 RT: 0.11 AV: 1 NL: 7.20E7  
T: FTMS (1,1) + p ESI Full ms [100.00-2000.00]

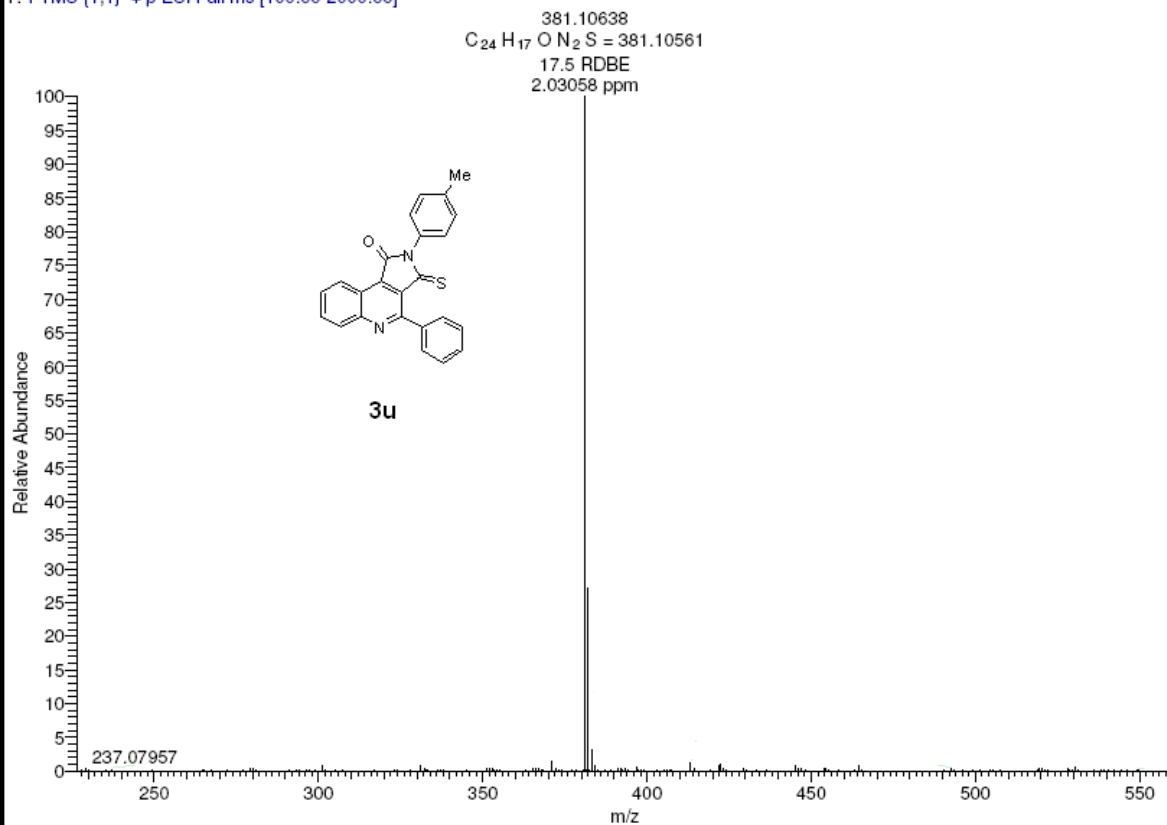

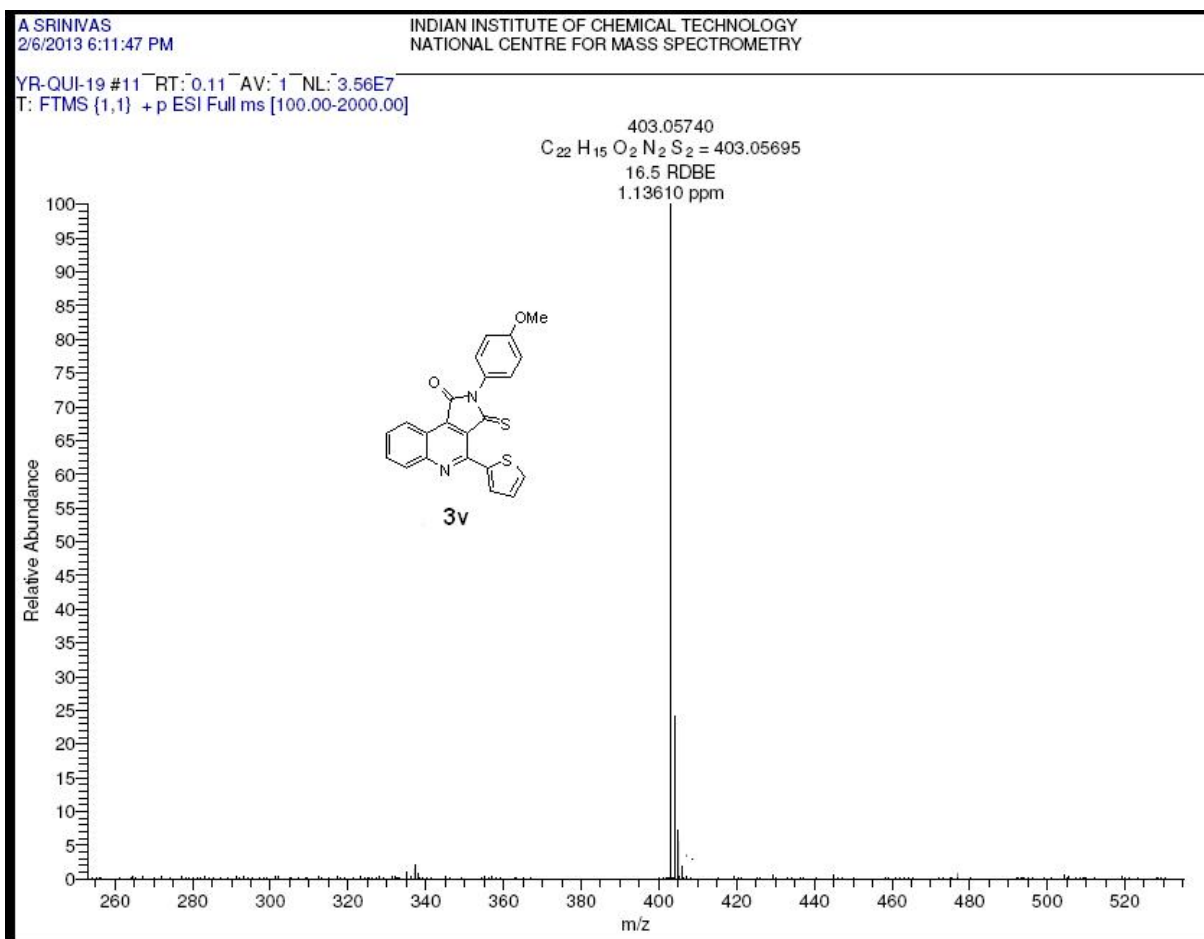

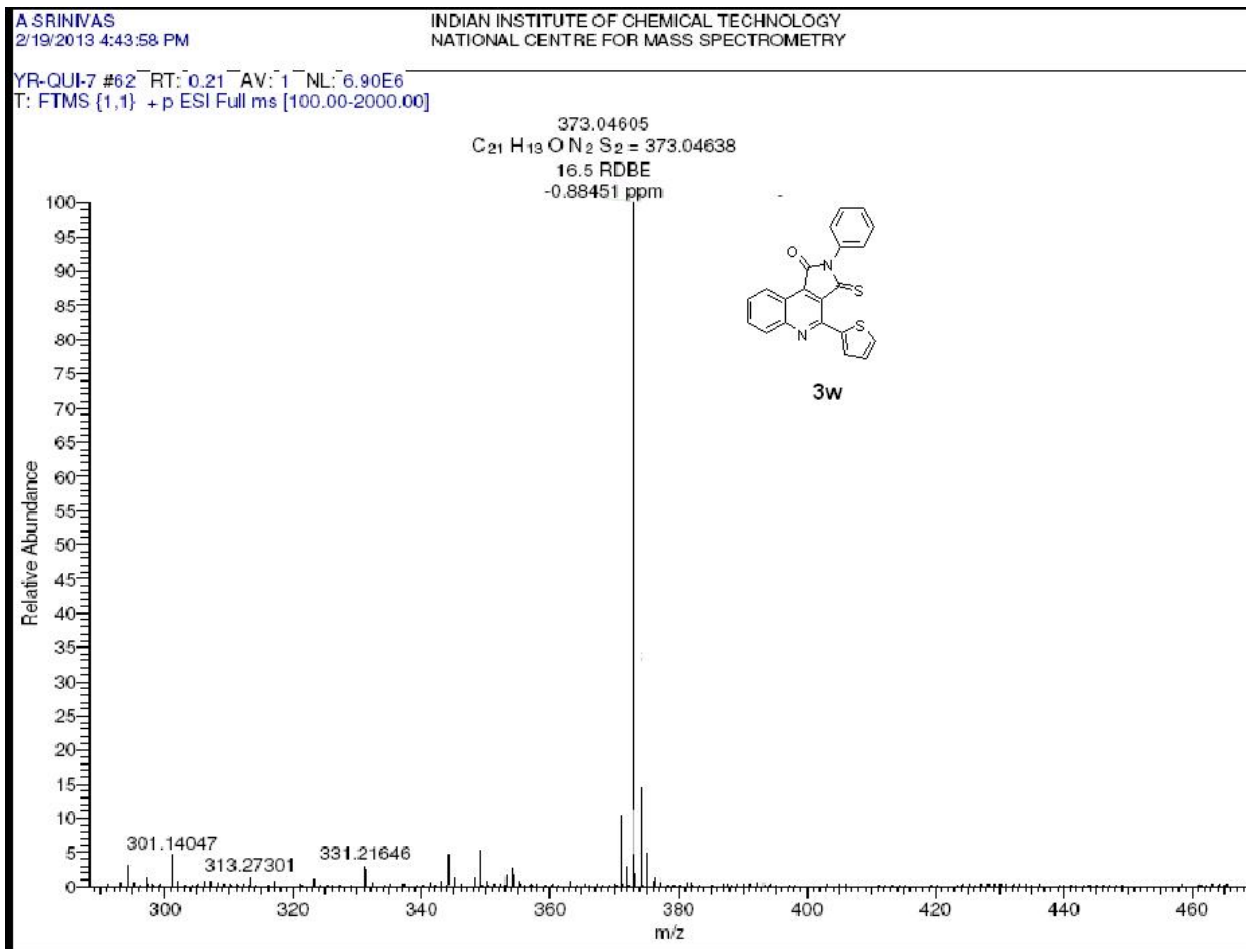

SRINIVAS  
3/7/2013 10:17:38 PM

INDIAN INSTITUTE OF CHEMICAL TECHNOLOGY  
NATIONAL CENTRE FOR MASS SPECTROMETRY

YR-QUI-12 #11 RT: 0.11 AV: 1 NL: 2.96E5  
T: FTMS (1,1) + p ESI Full ms [100.00-2000.00]

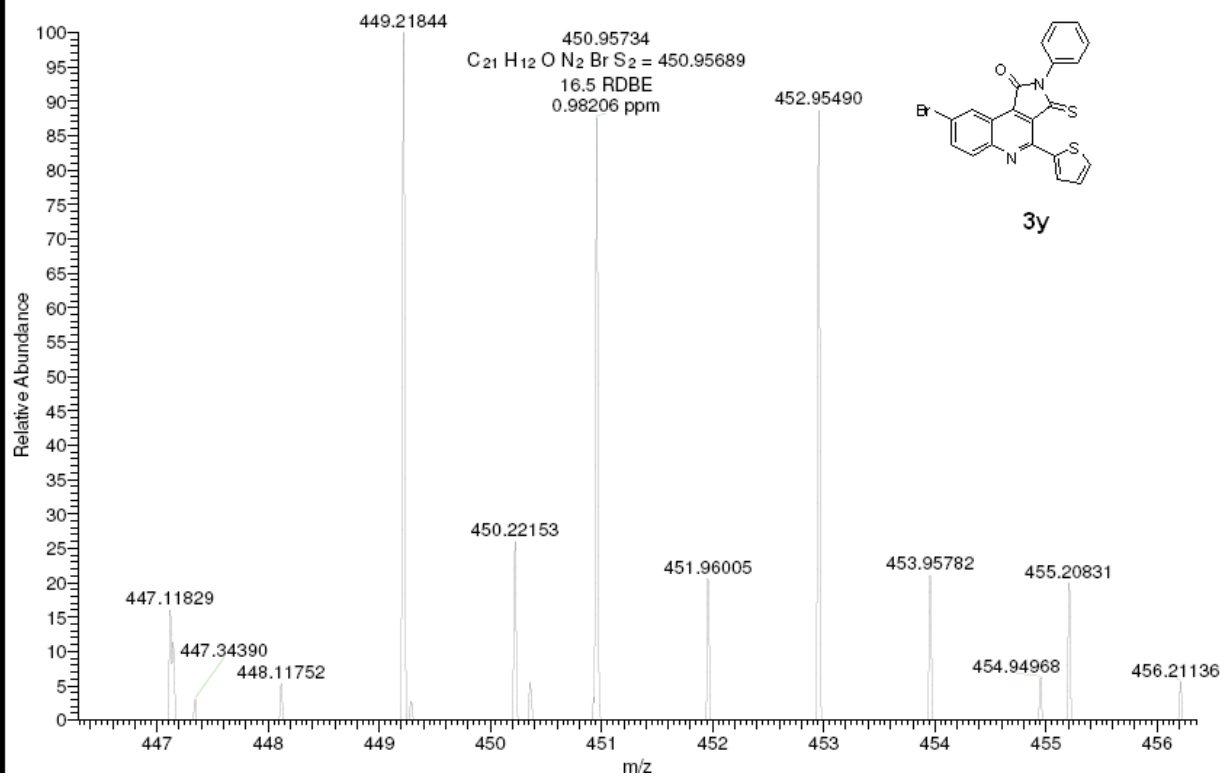

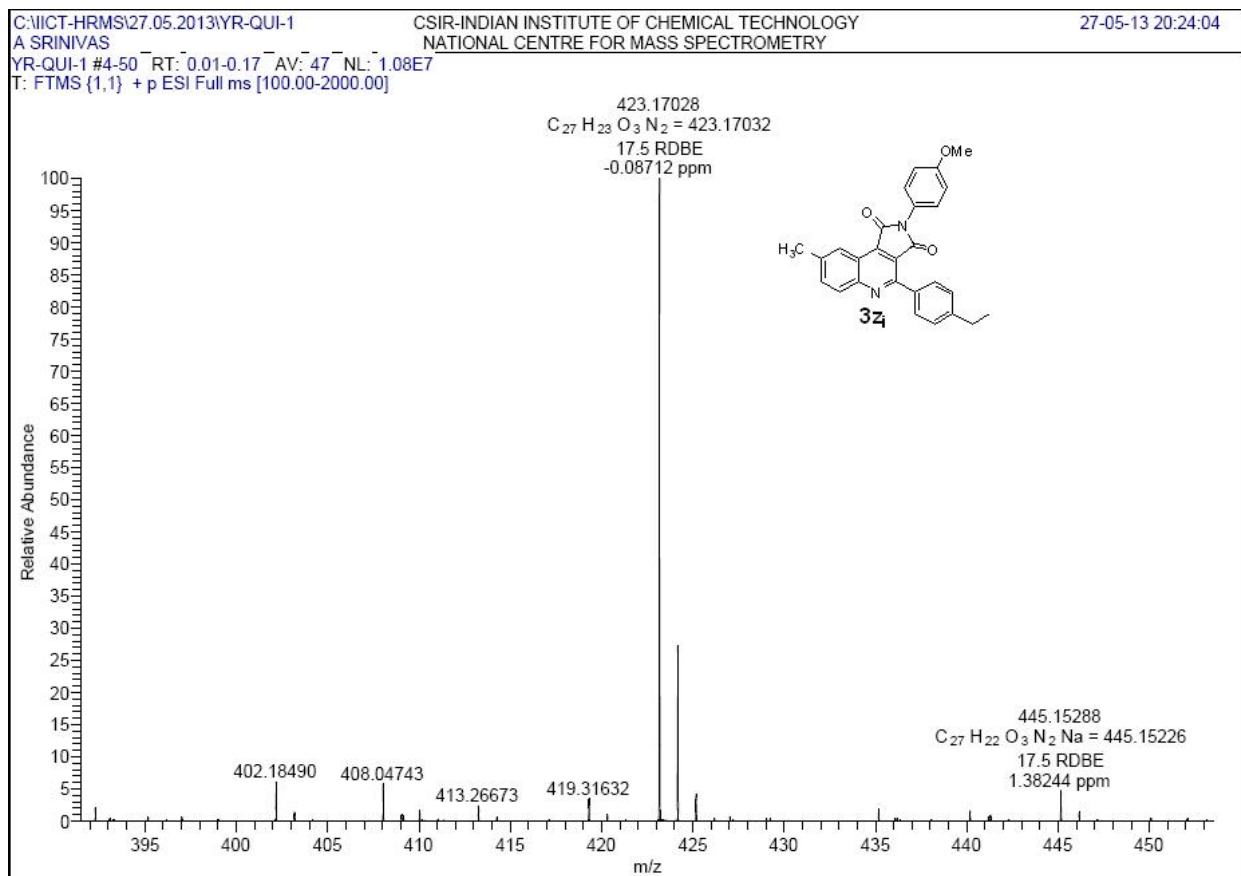

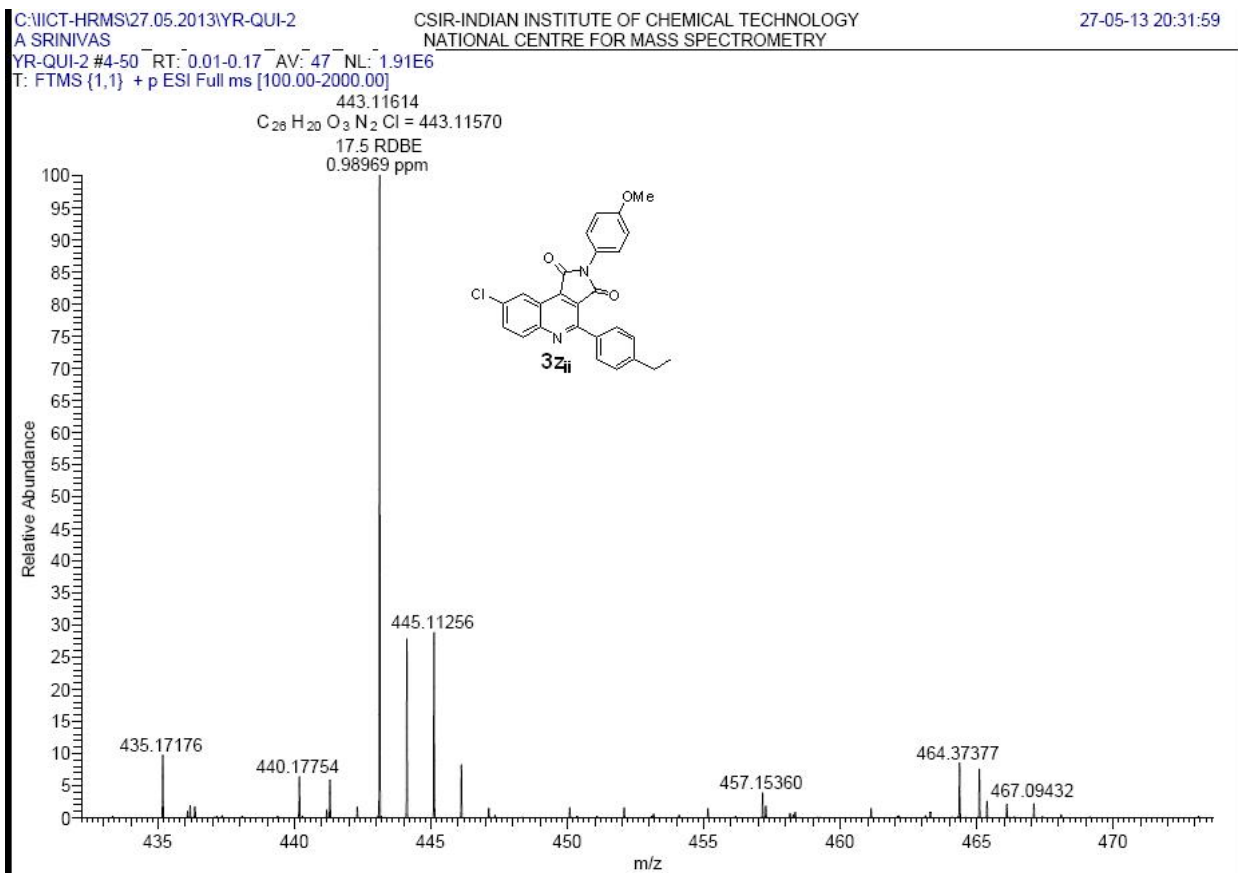

C:\NICT-HRMS\27.05.2013\YR-QUI-3

CSIR-INDIAN INSTITUTE OF CHEMICAL TECHNOLOGY

27-05-13 20:29:18

A SRINIVAS

NATIONAL CENTRE FOR MASS SPECTROMETRY

YR-QUI-3 #4-50 RT: 0.01-0.17 AV: 47 NL: 3.30E6

T: FTMS {1,1} + p ESI Full ms [100.00-2000.00]

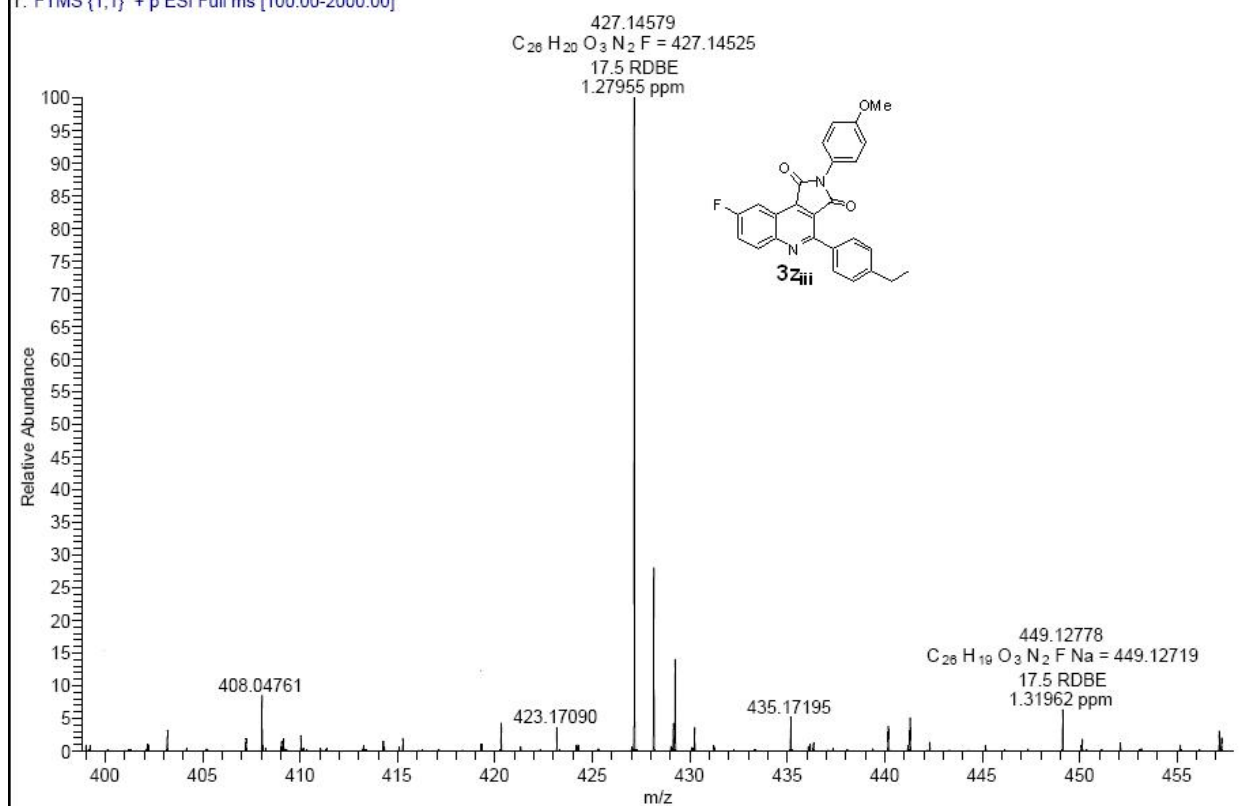

C:\NICT-HRMS\27.05.2013\YR-QUI-4

CSIR-INDIAN INSTITUTE OF CHEMICAL TECHNOLOGY

27-05-13 20:37:13

A SRINIVAS

NATIONAL CENTRE FOR MASS SPECTROMETRY

YR-QUI-4 #4-50 RT: 0.01-0.17 AV: 47 NL: 9.05E5

T: FTMS (1,1) + p ESI Full ms [100.00-2000.00]

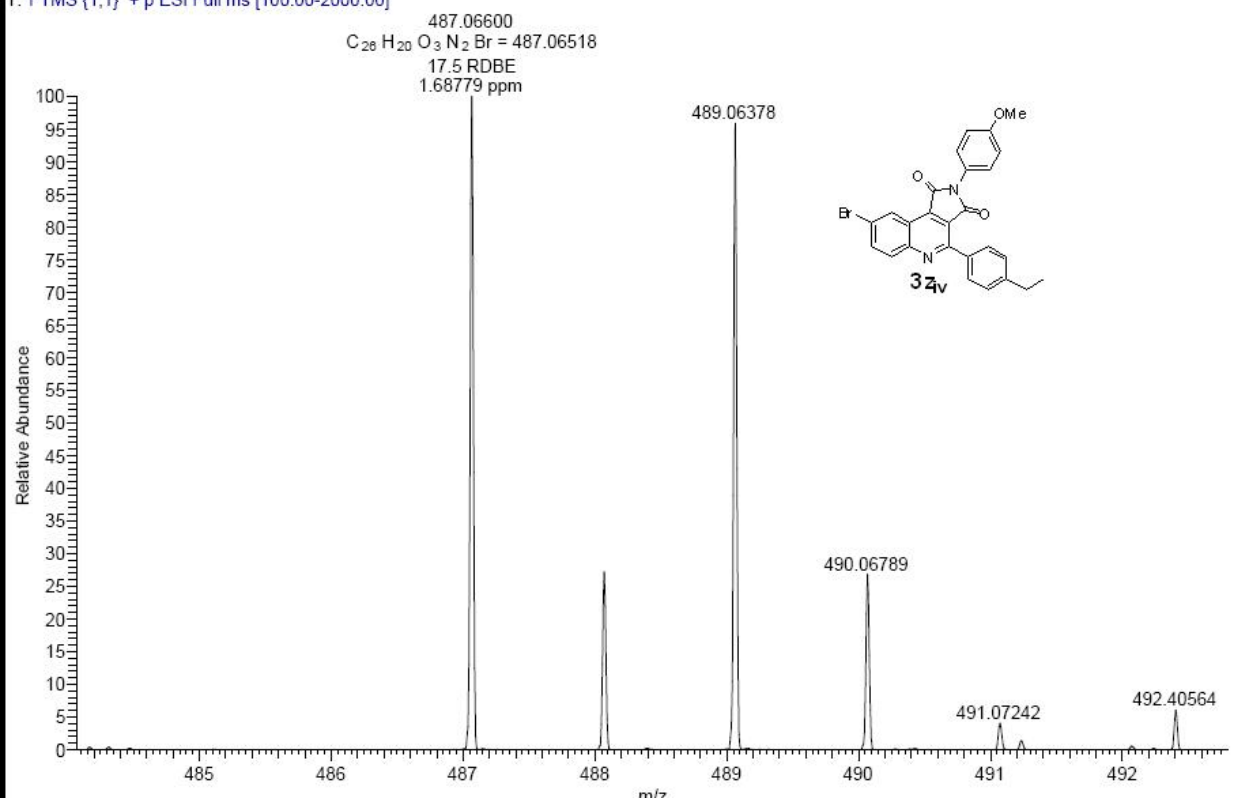



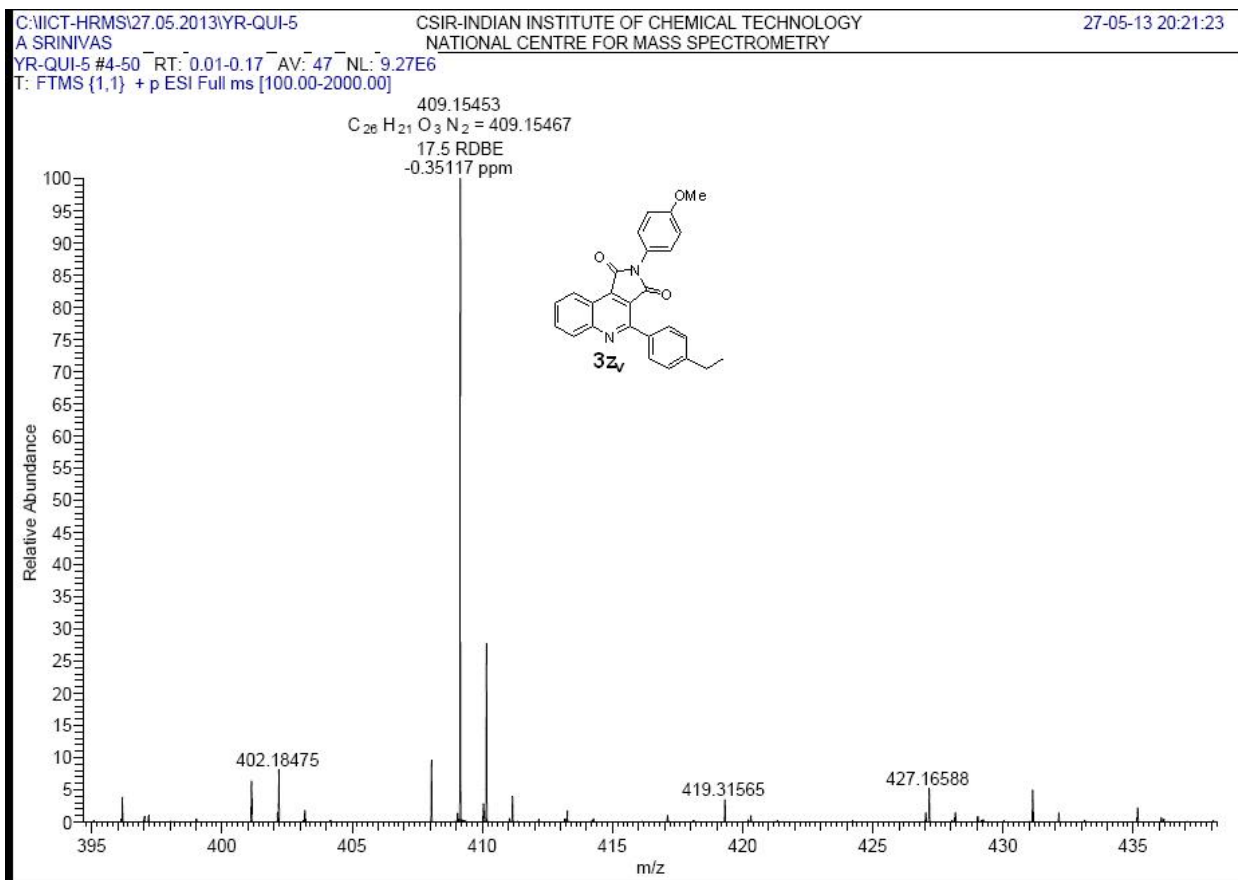

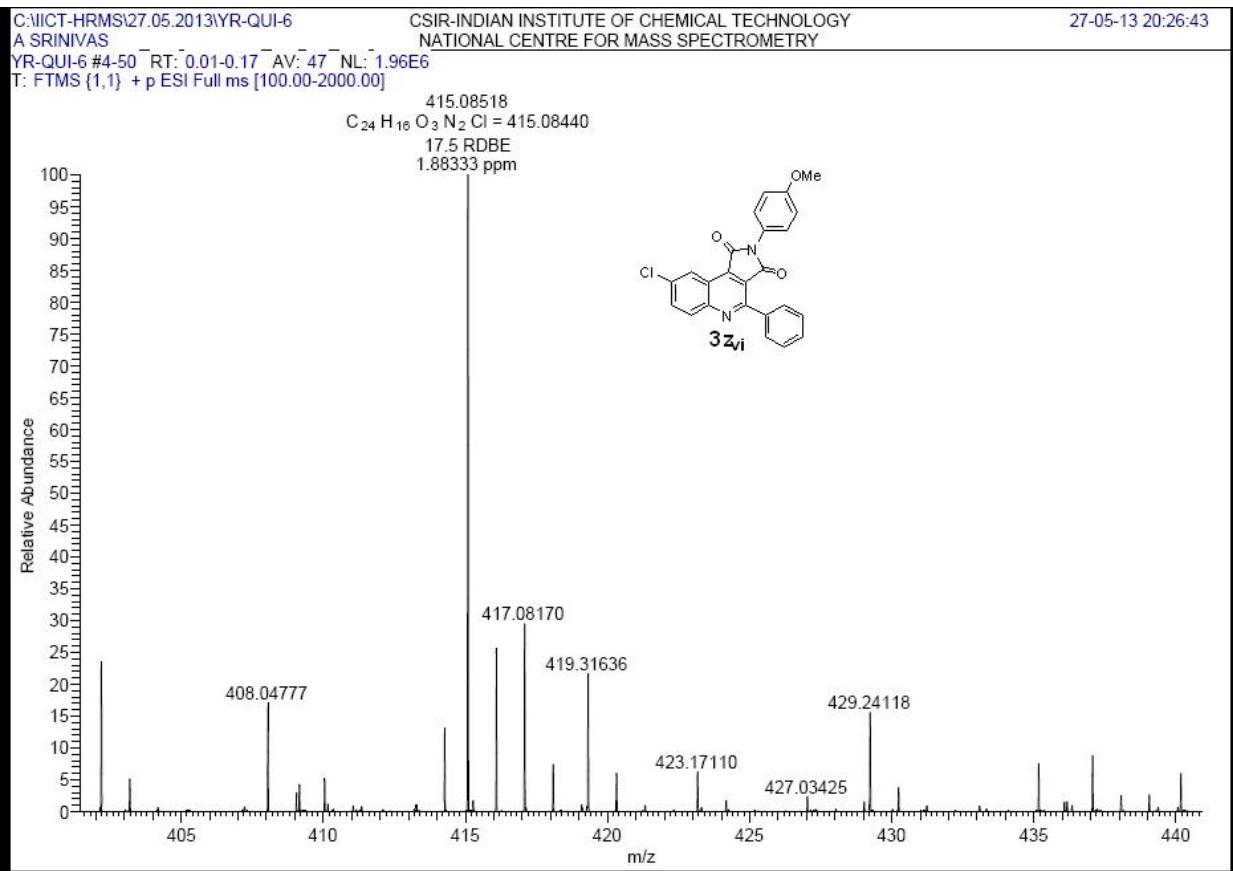

Supplement: c3ra43489c.pdf [file c3ra43489c.pdf]
